# Supplementary material
Source: PubMed Central journal article supplement (PMC4856474)

# Data S4A

Count of Expressed Cancer-Restricted SEREX Genes

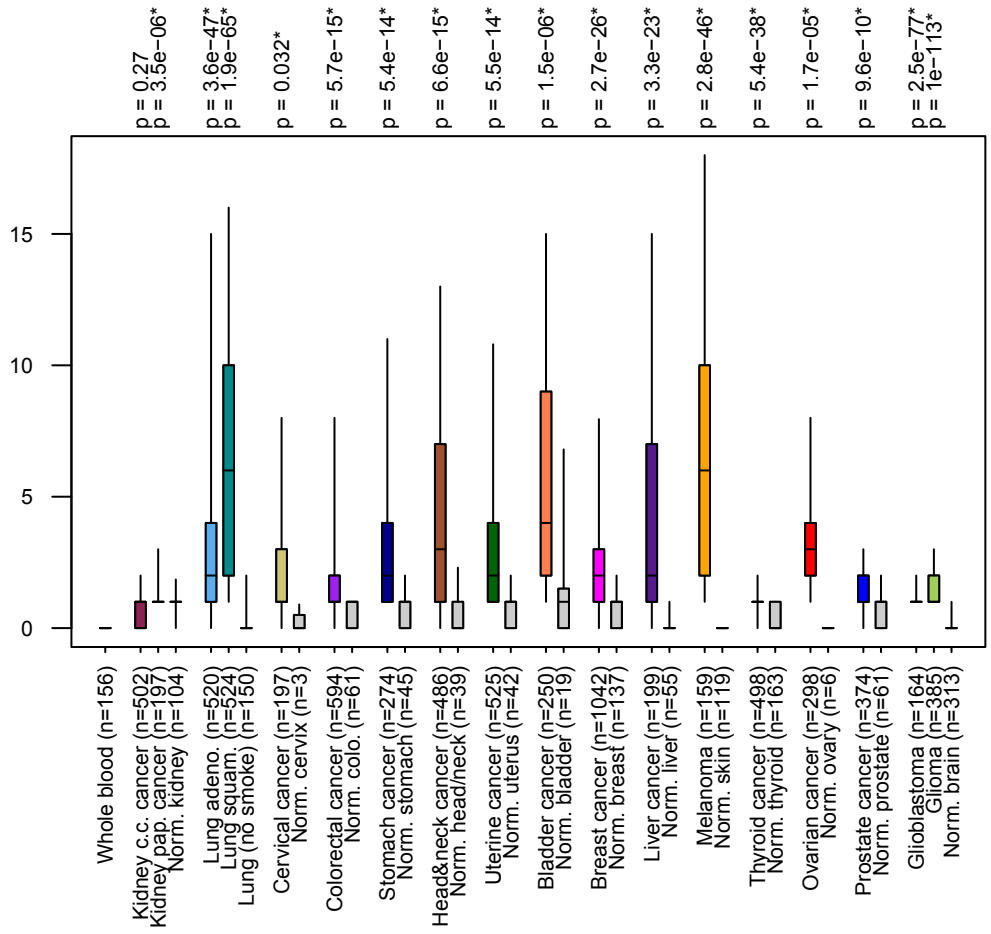

# Data S4B

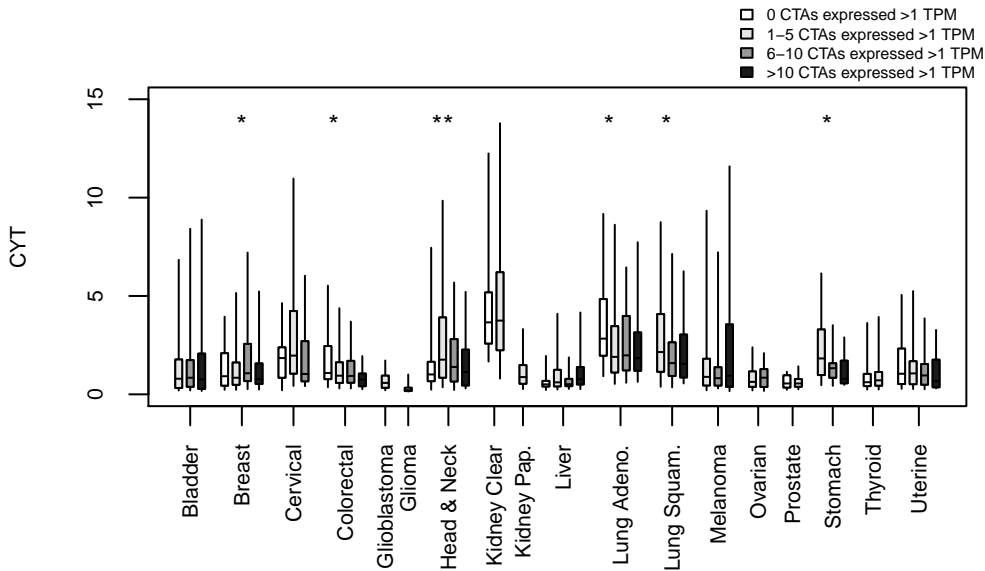

# Data S4C

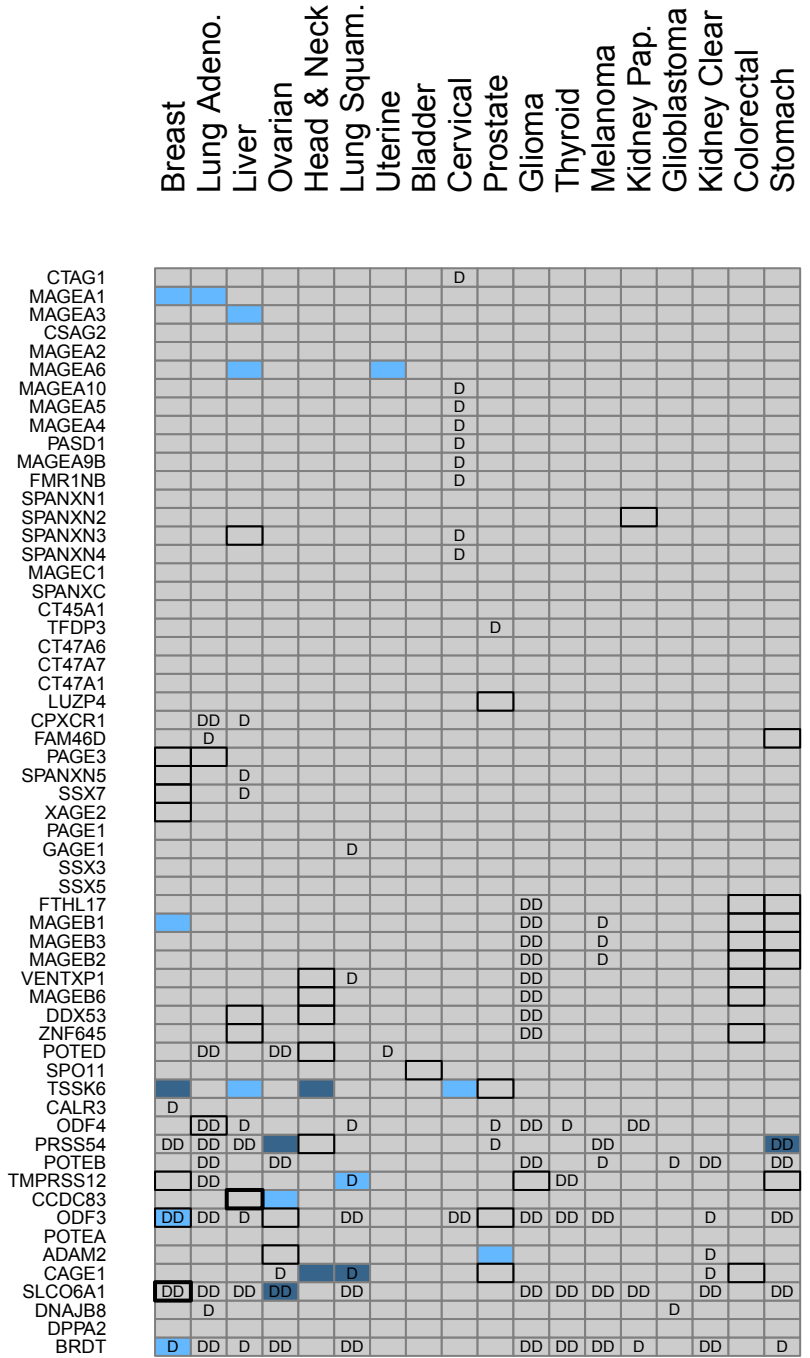

- Deletion associated with lower cis expression,  $p < 0.1$
- Deletion associated with lower cis expression,  $p < 0.01$
- Deletion associated with higher CYT,  $p < 0.1$
- Deletion associated with higher CYT,  $p < 0.01$
- D More often deleted than amplified,  $p < 0.1$
- DD More often deleted than amplified,  $p < 0.01$

# Data S4D

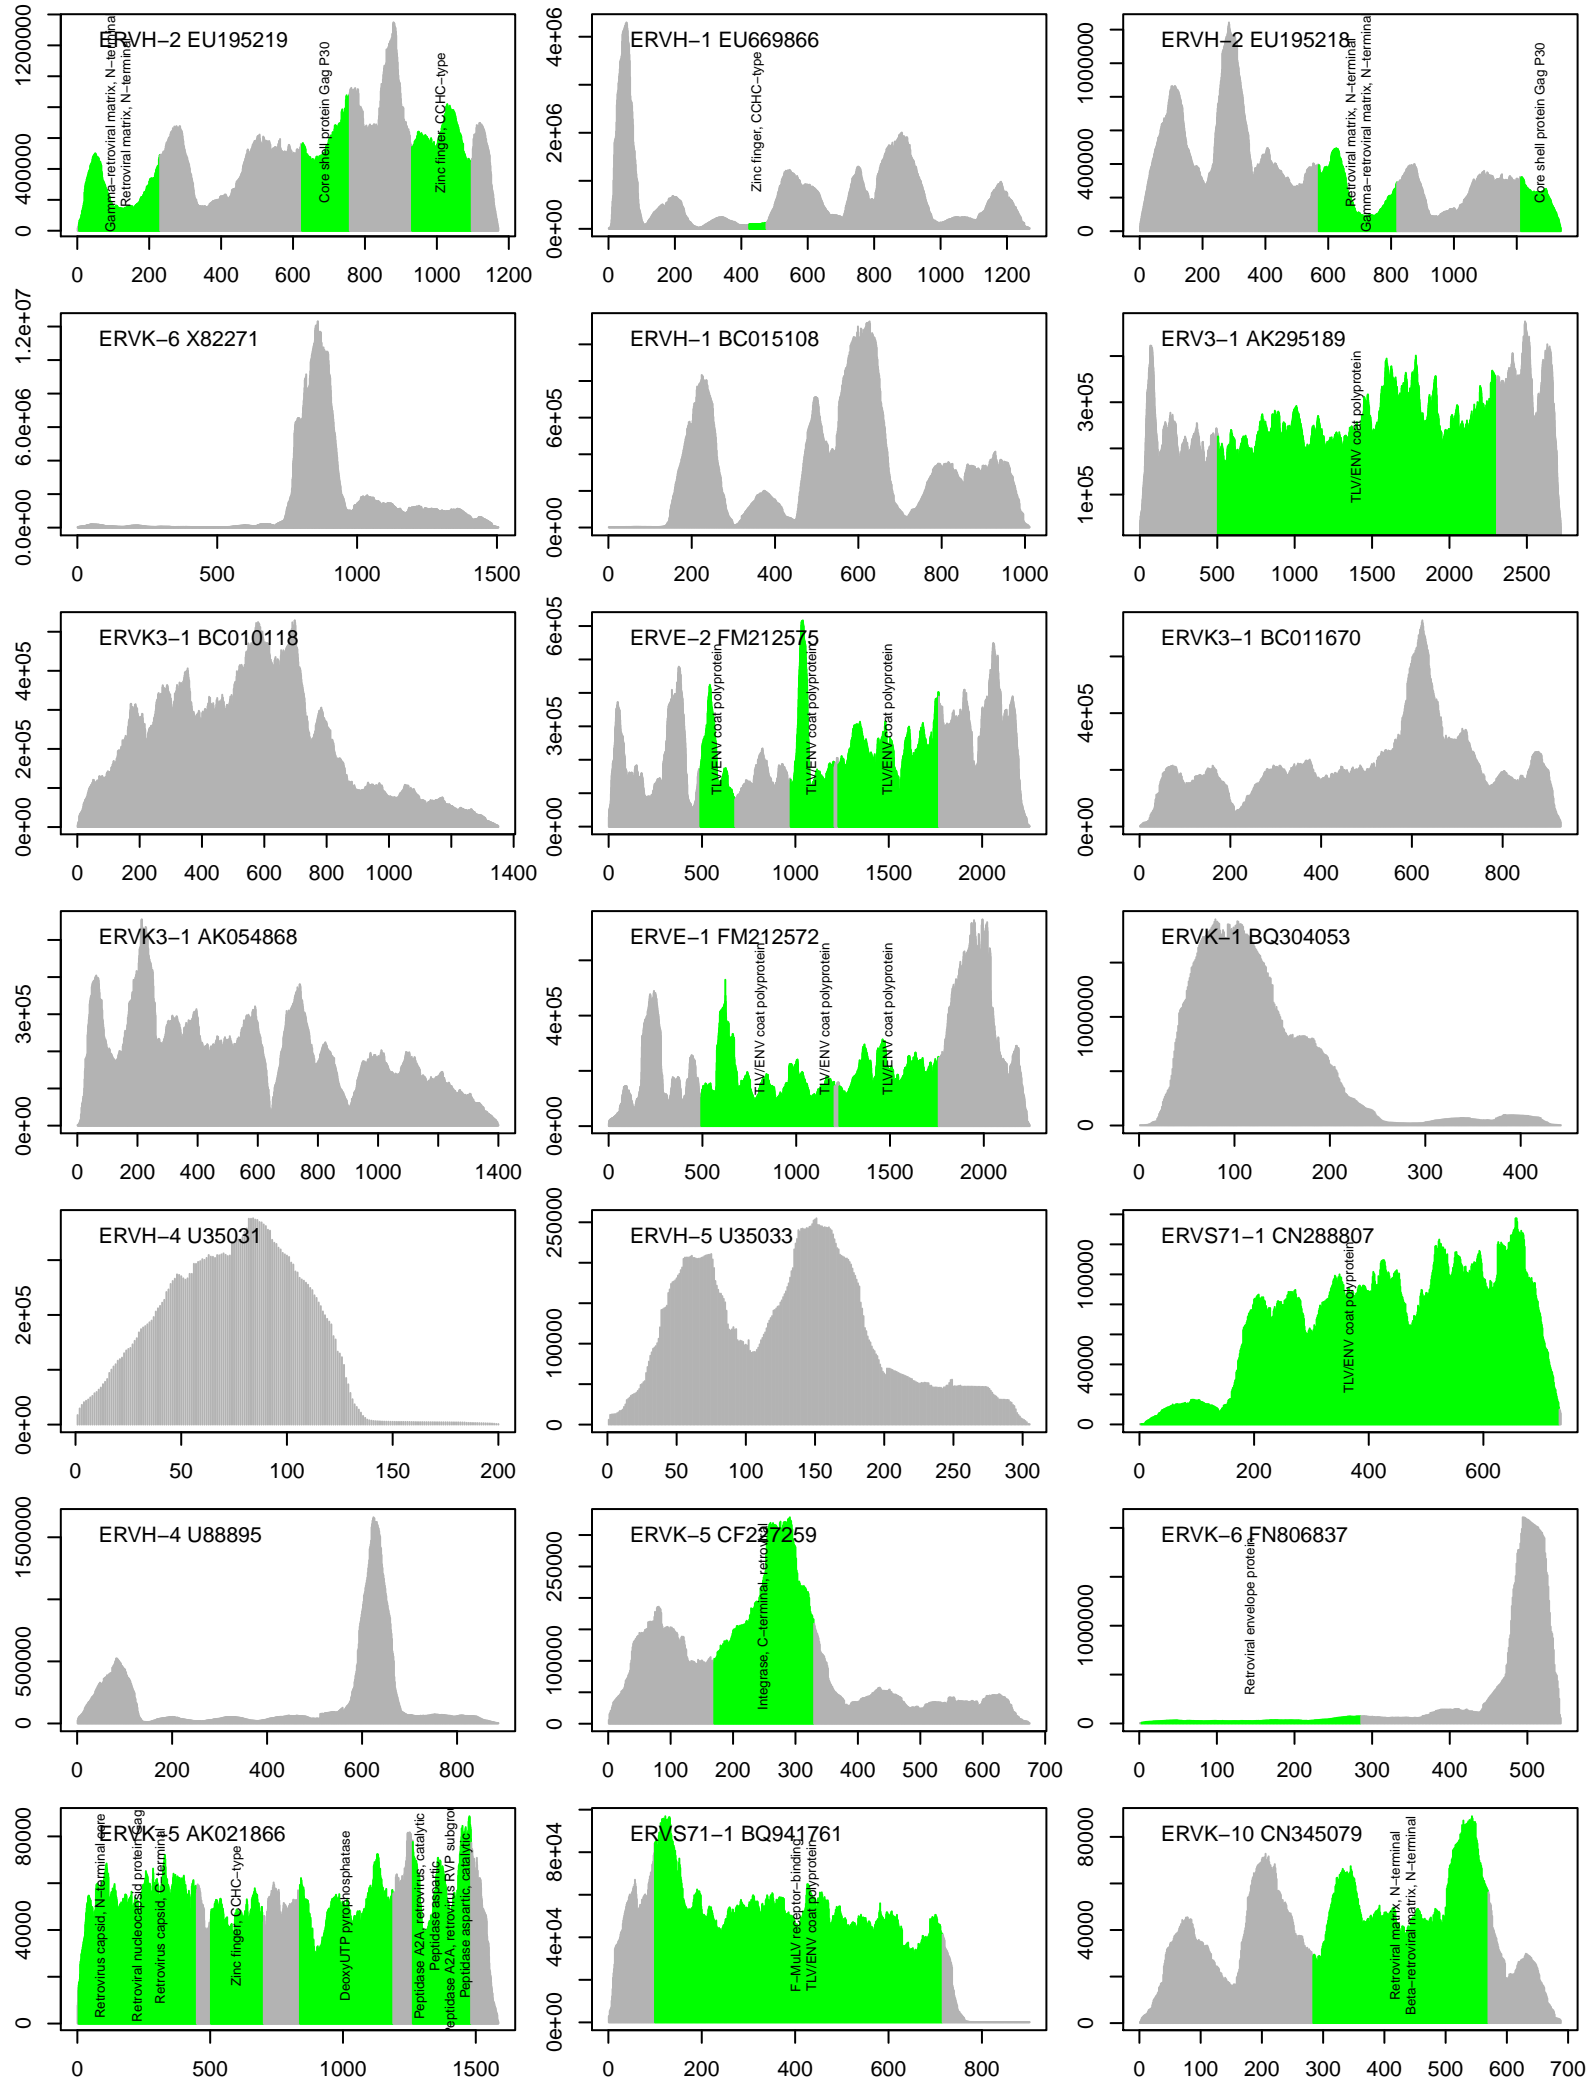



# Data S4D, cont...

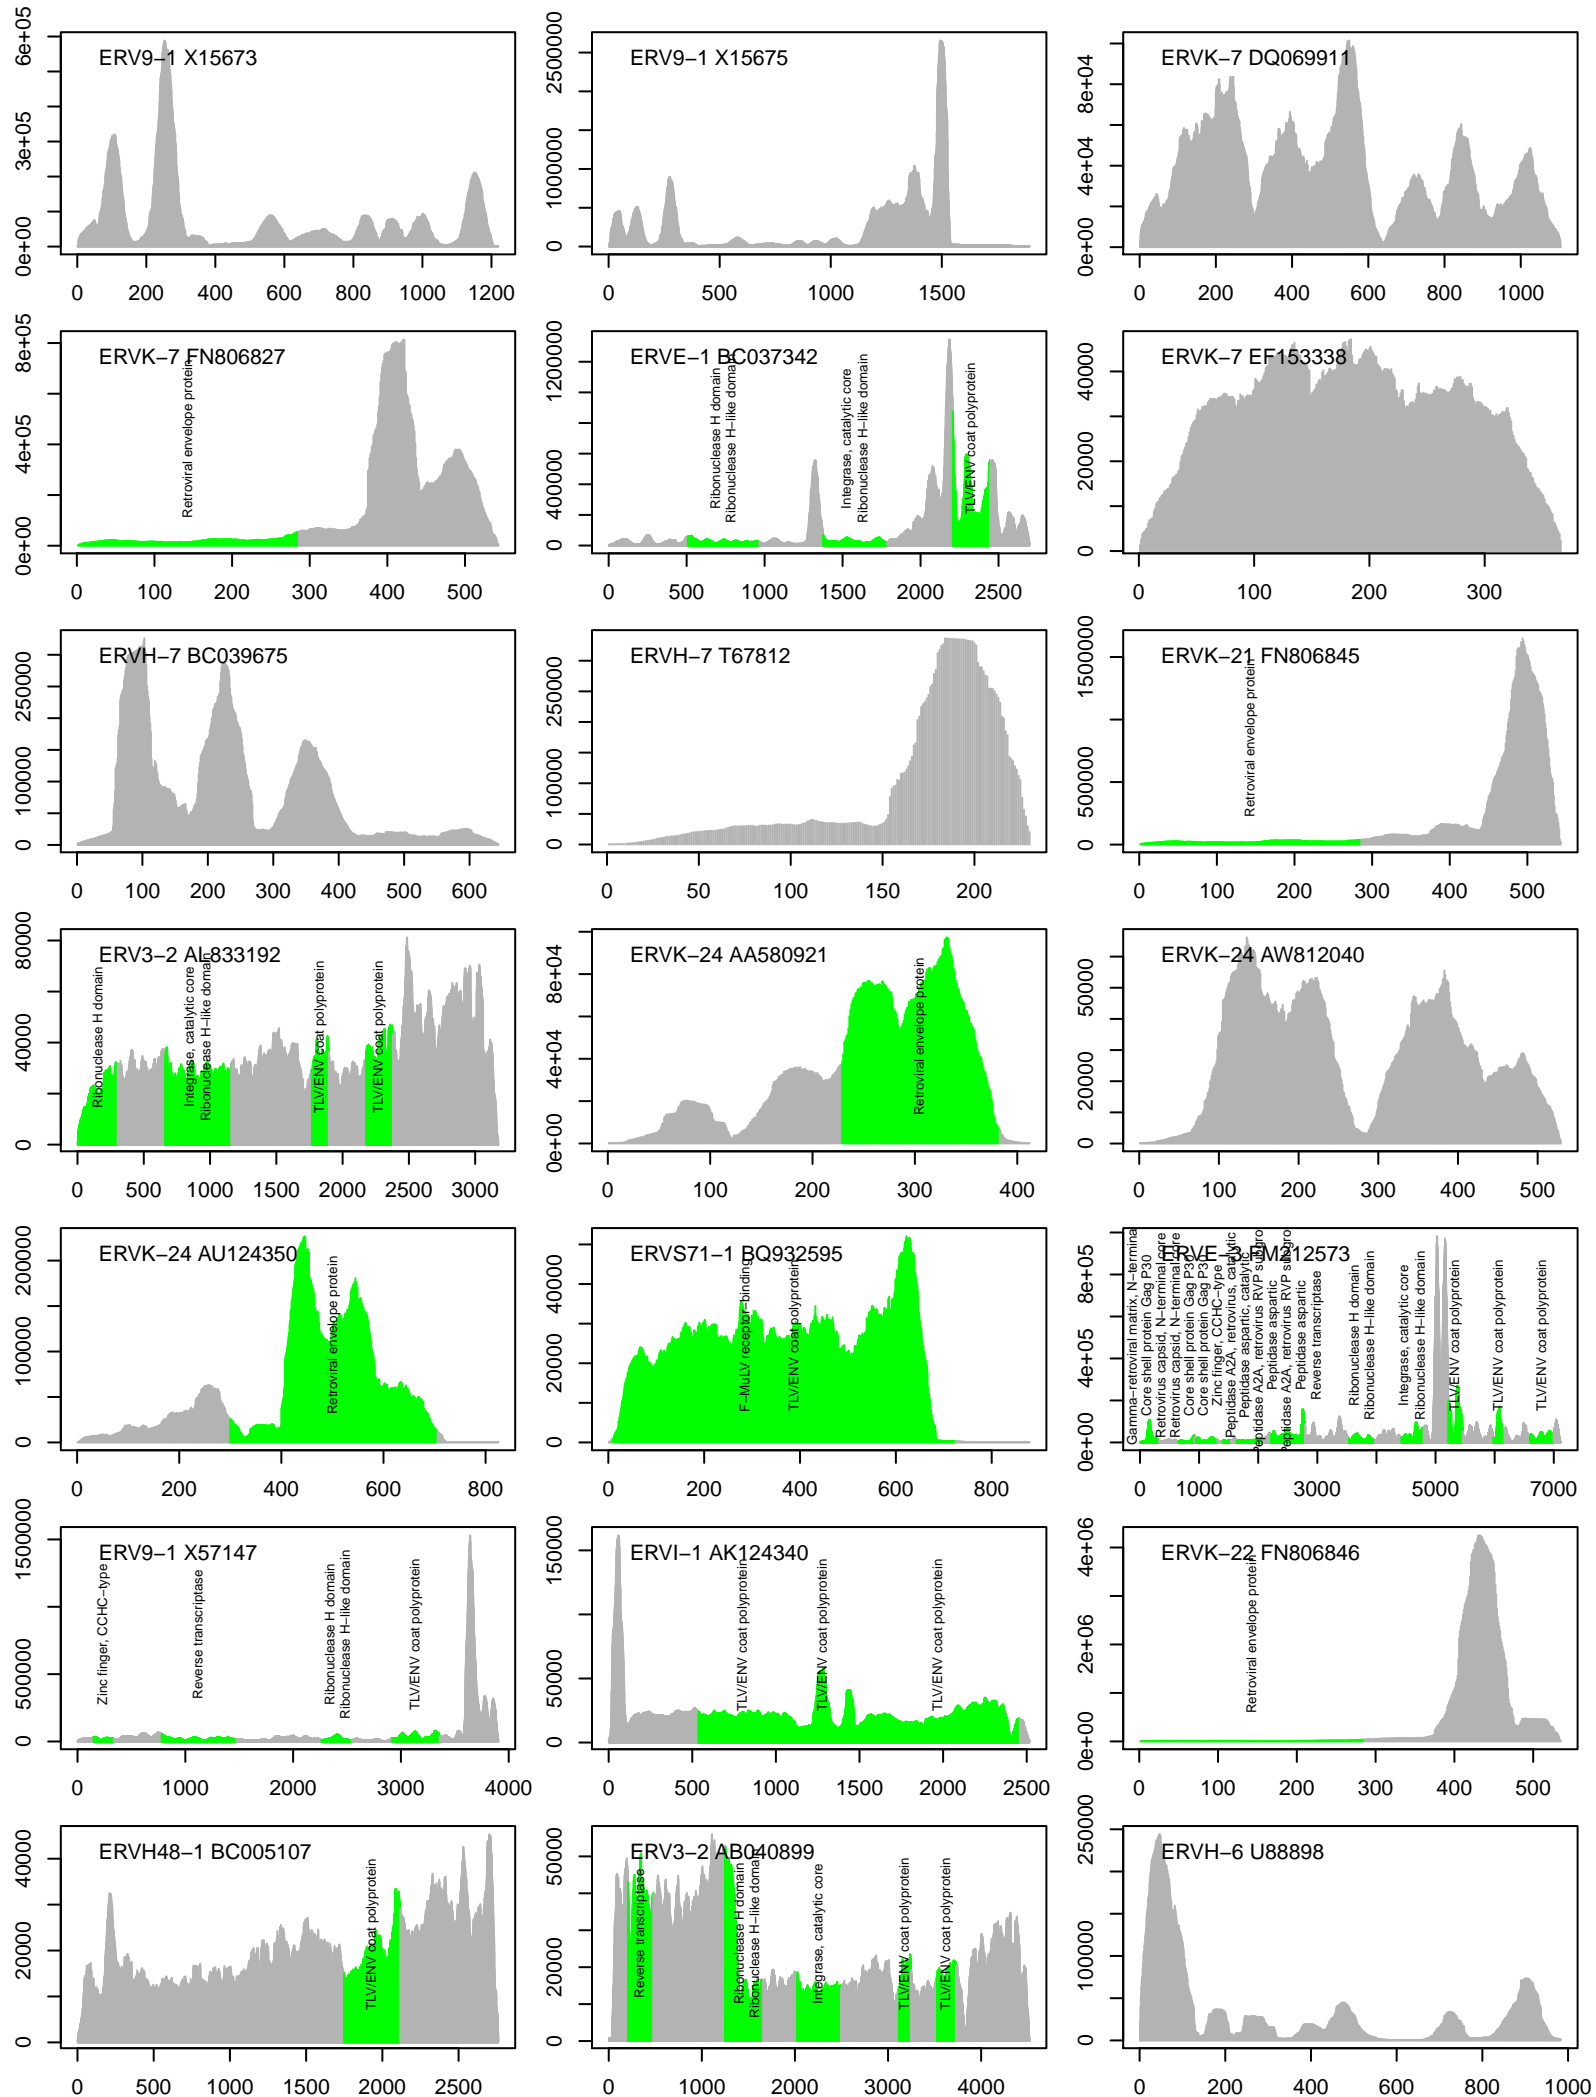

# Data S4D, cont...

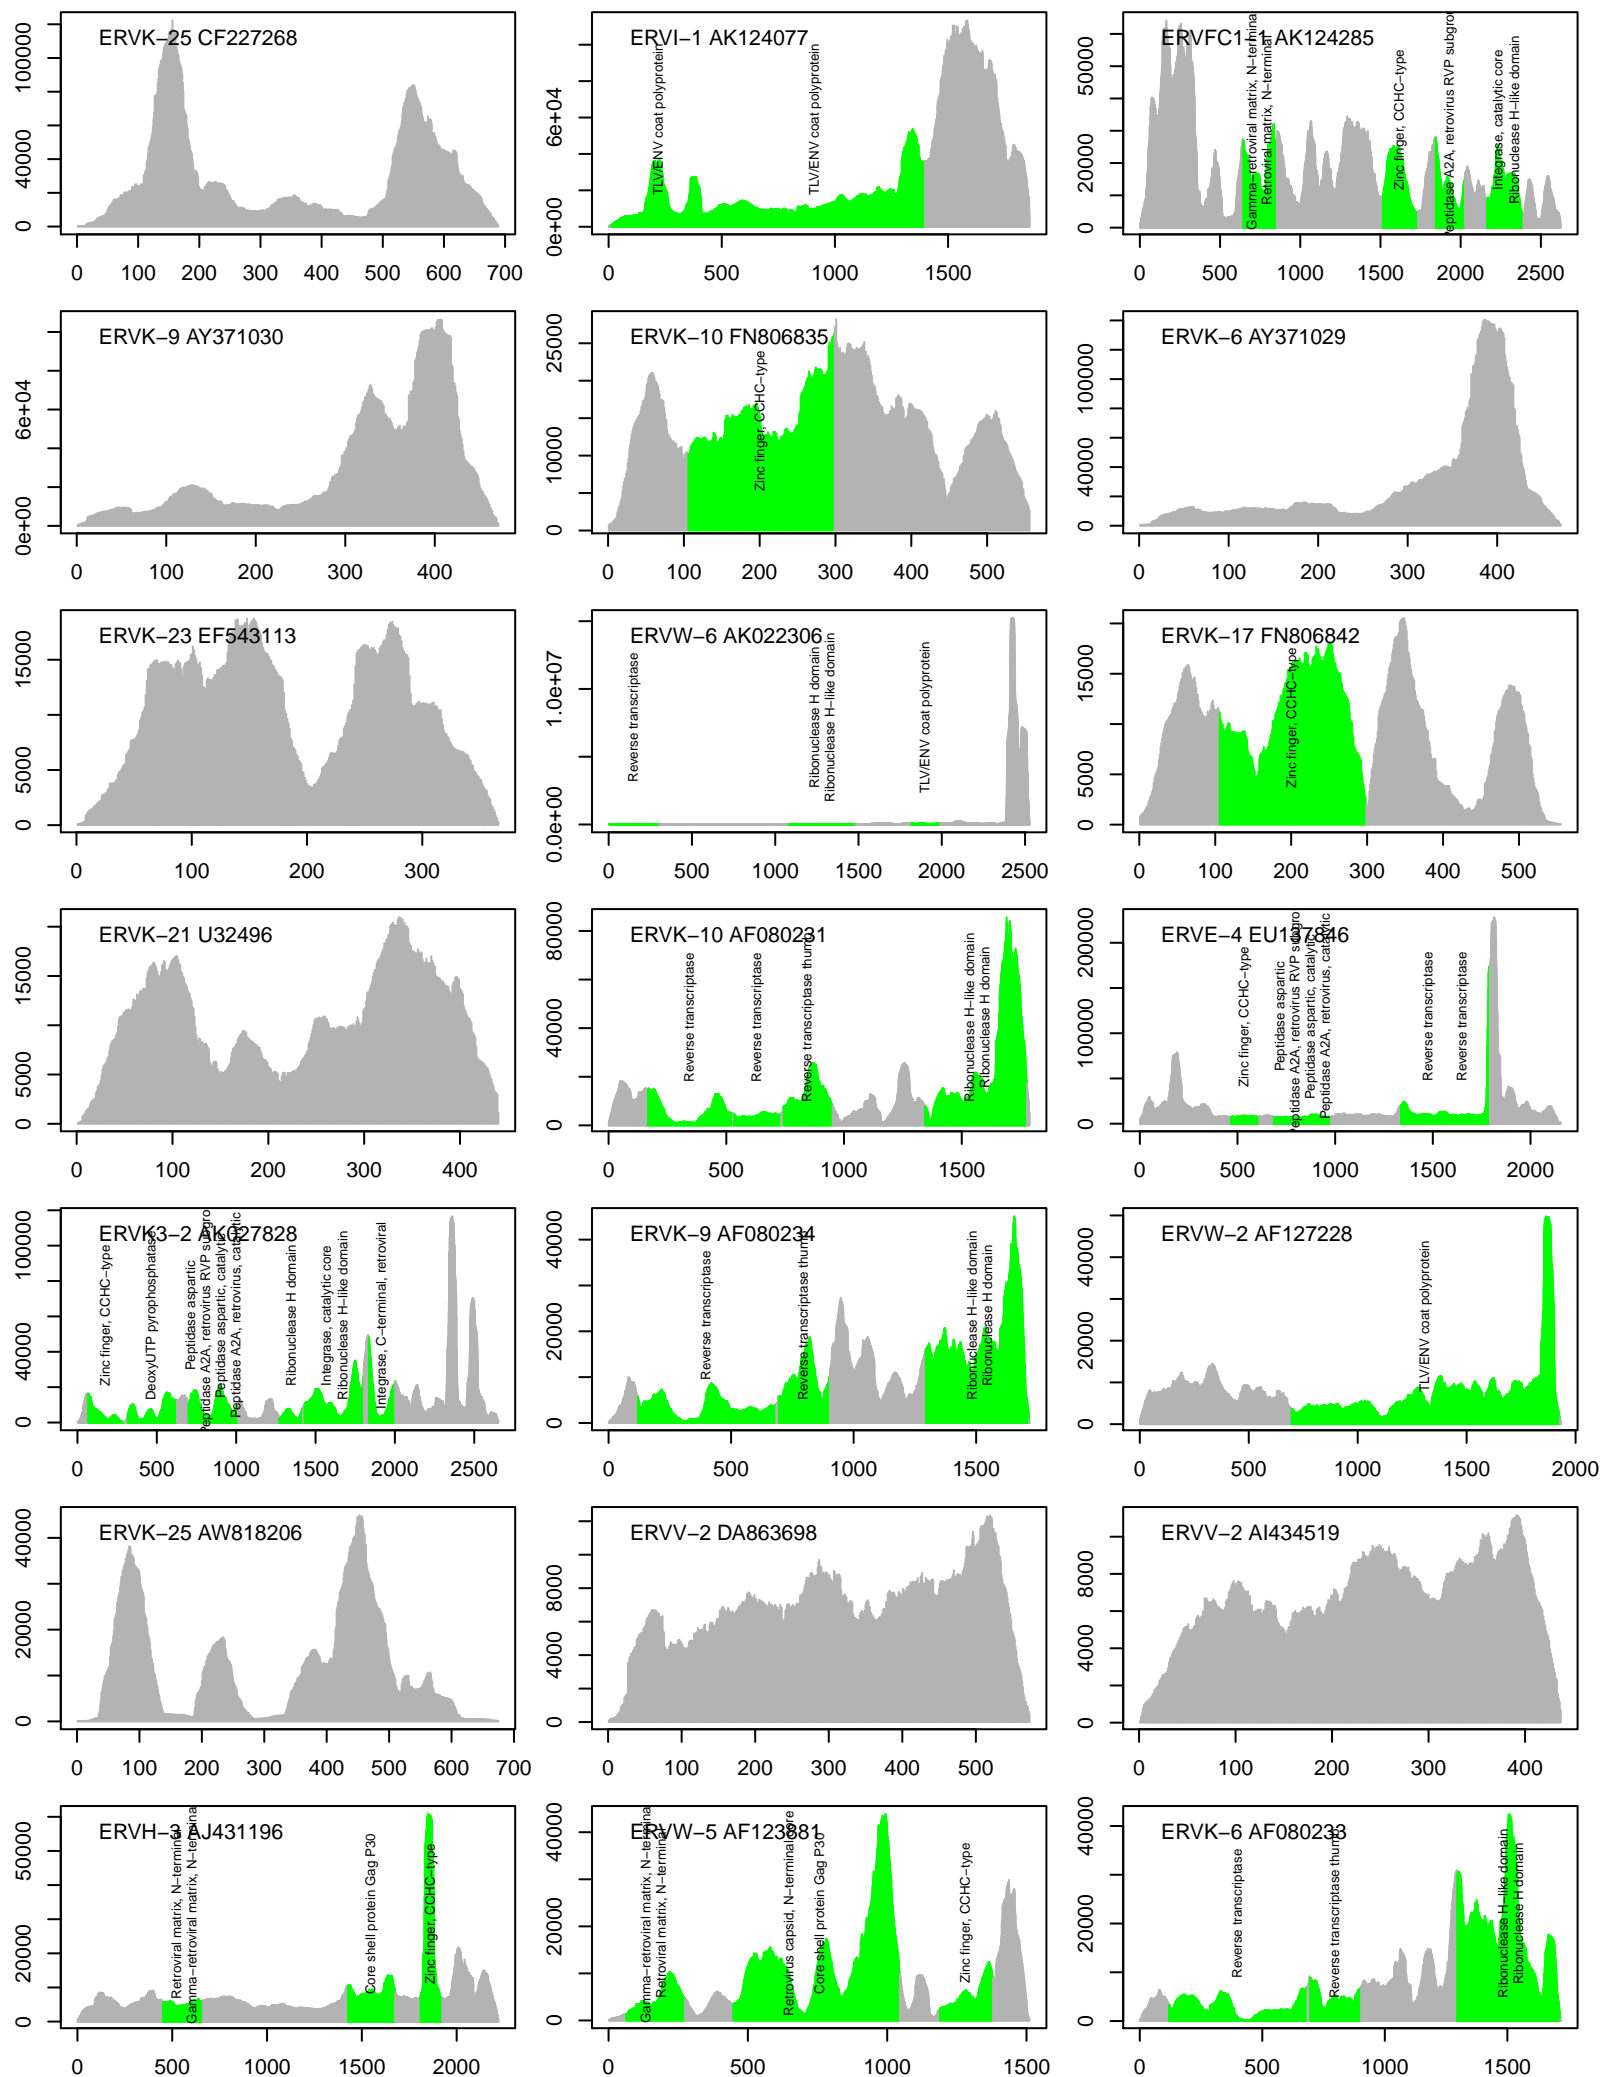

# Data S4D, cont...

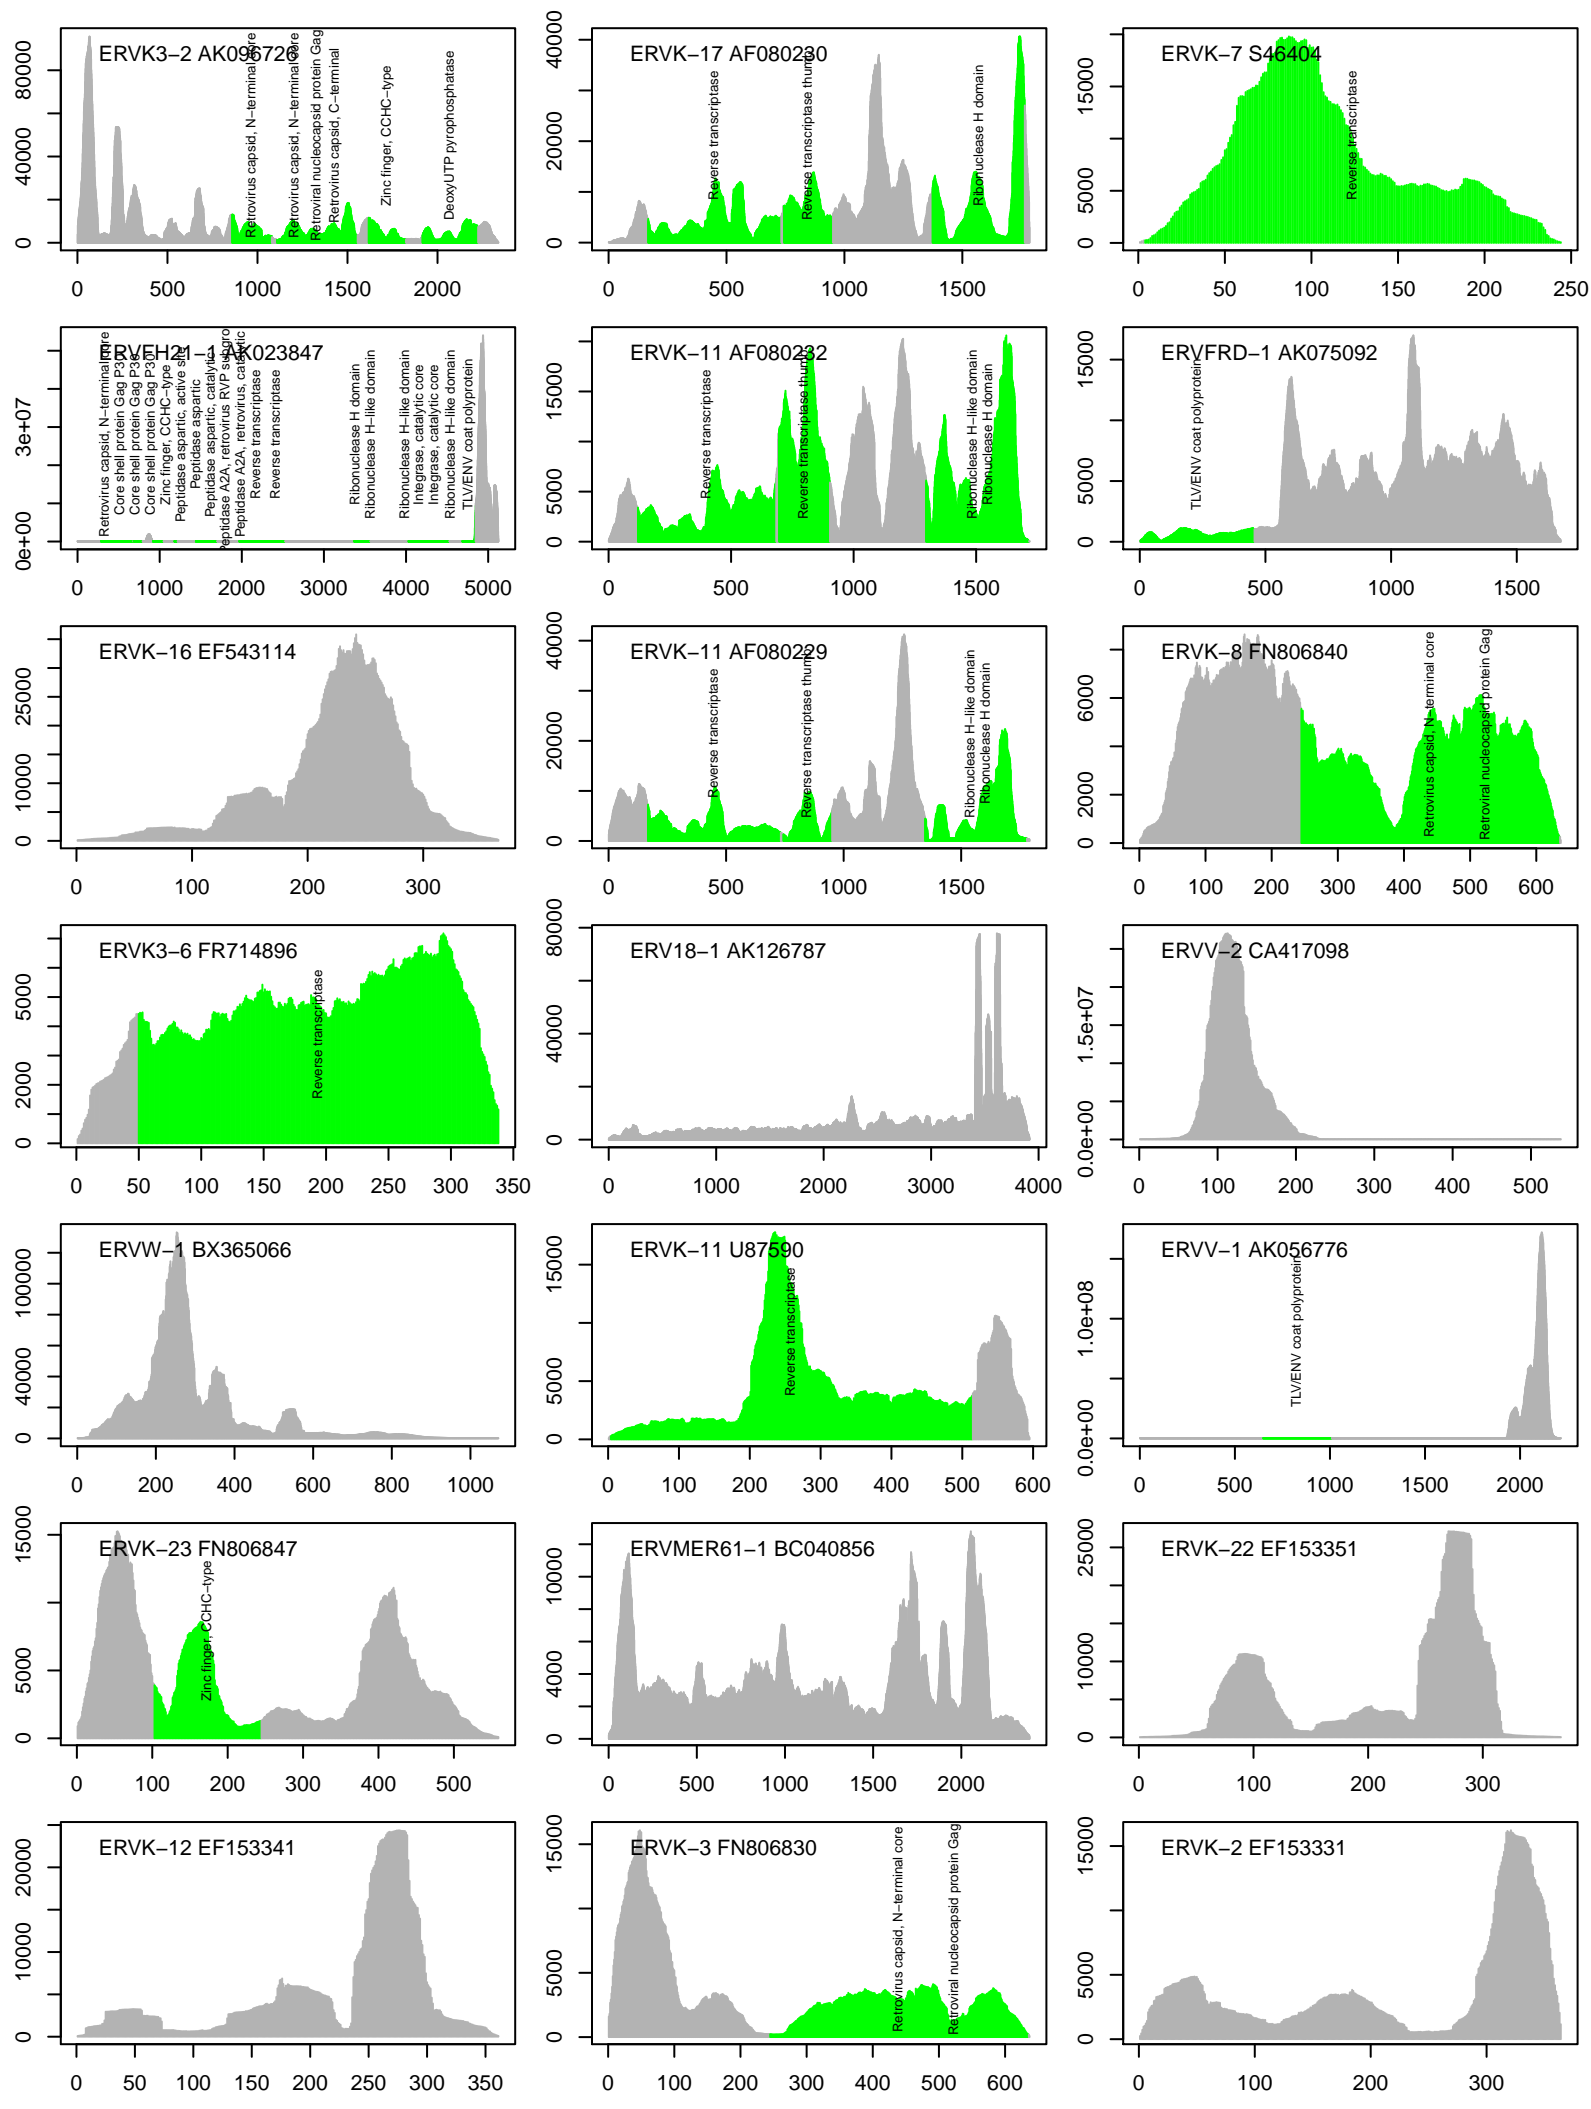

# Data S4D, cont...

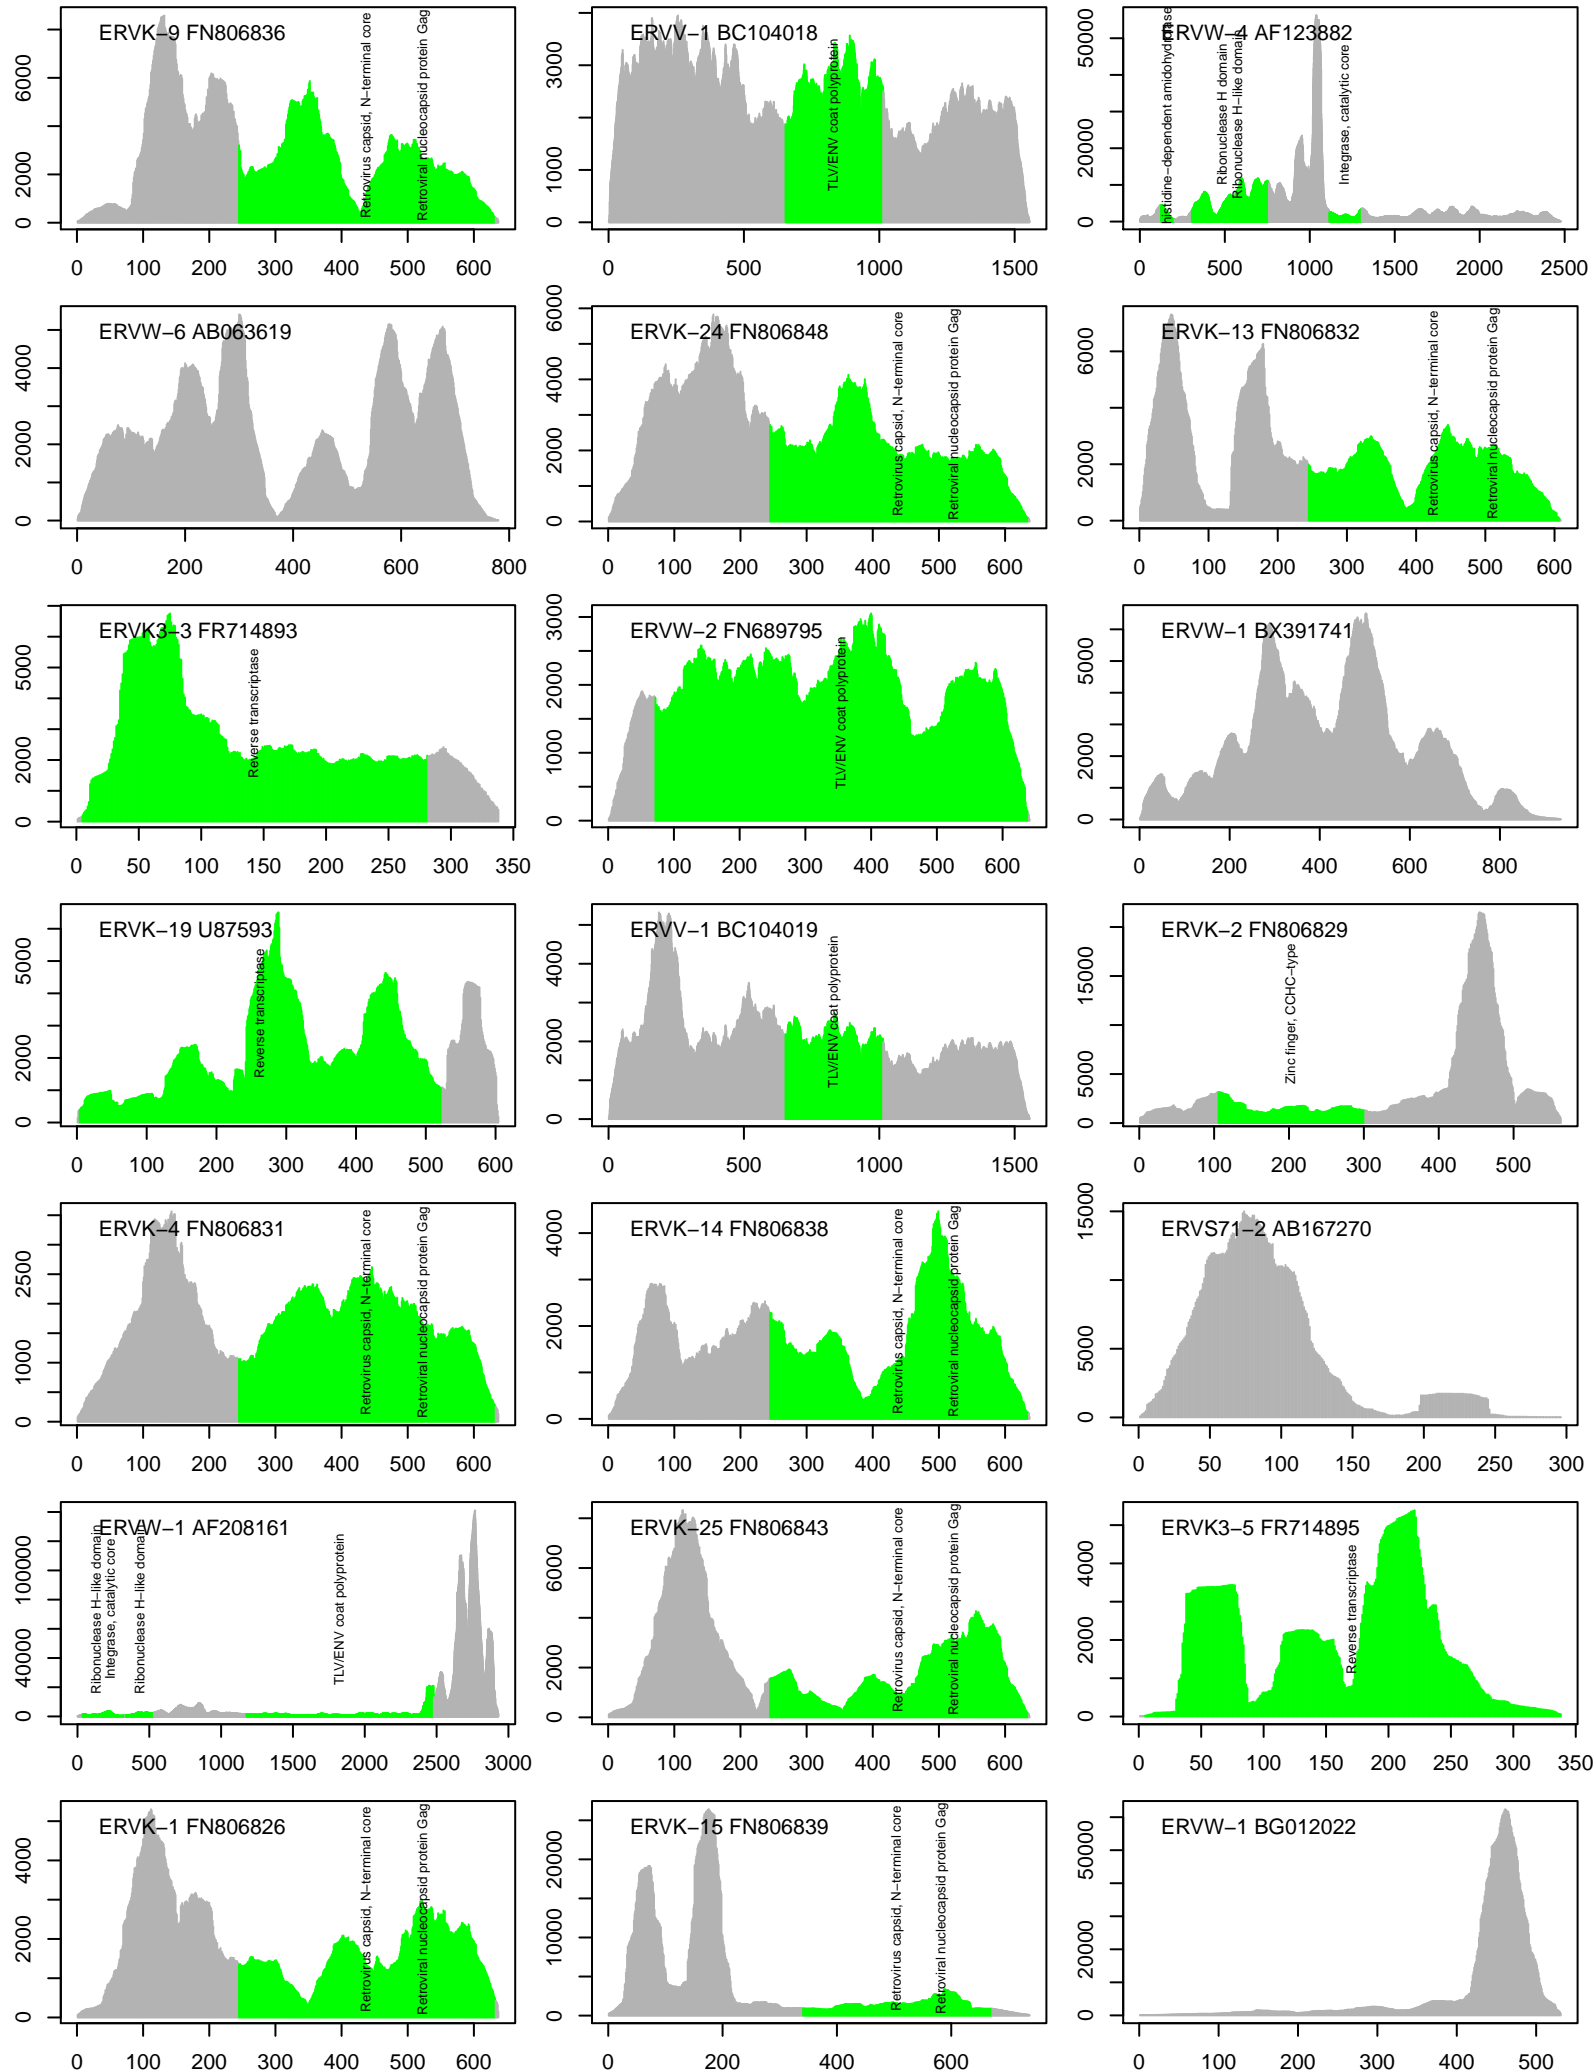

# Data S4D, cont...

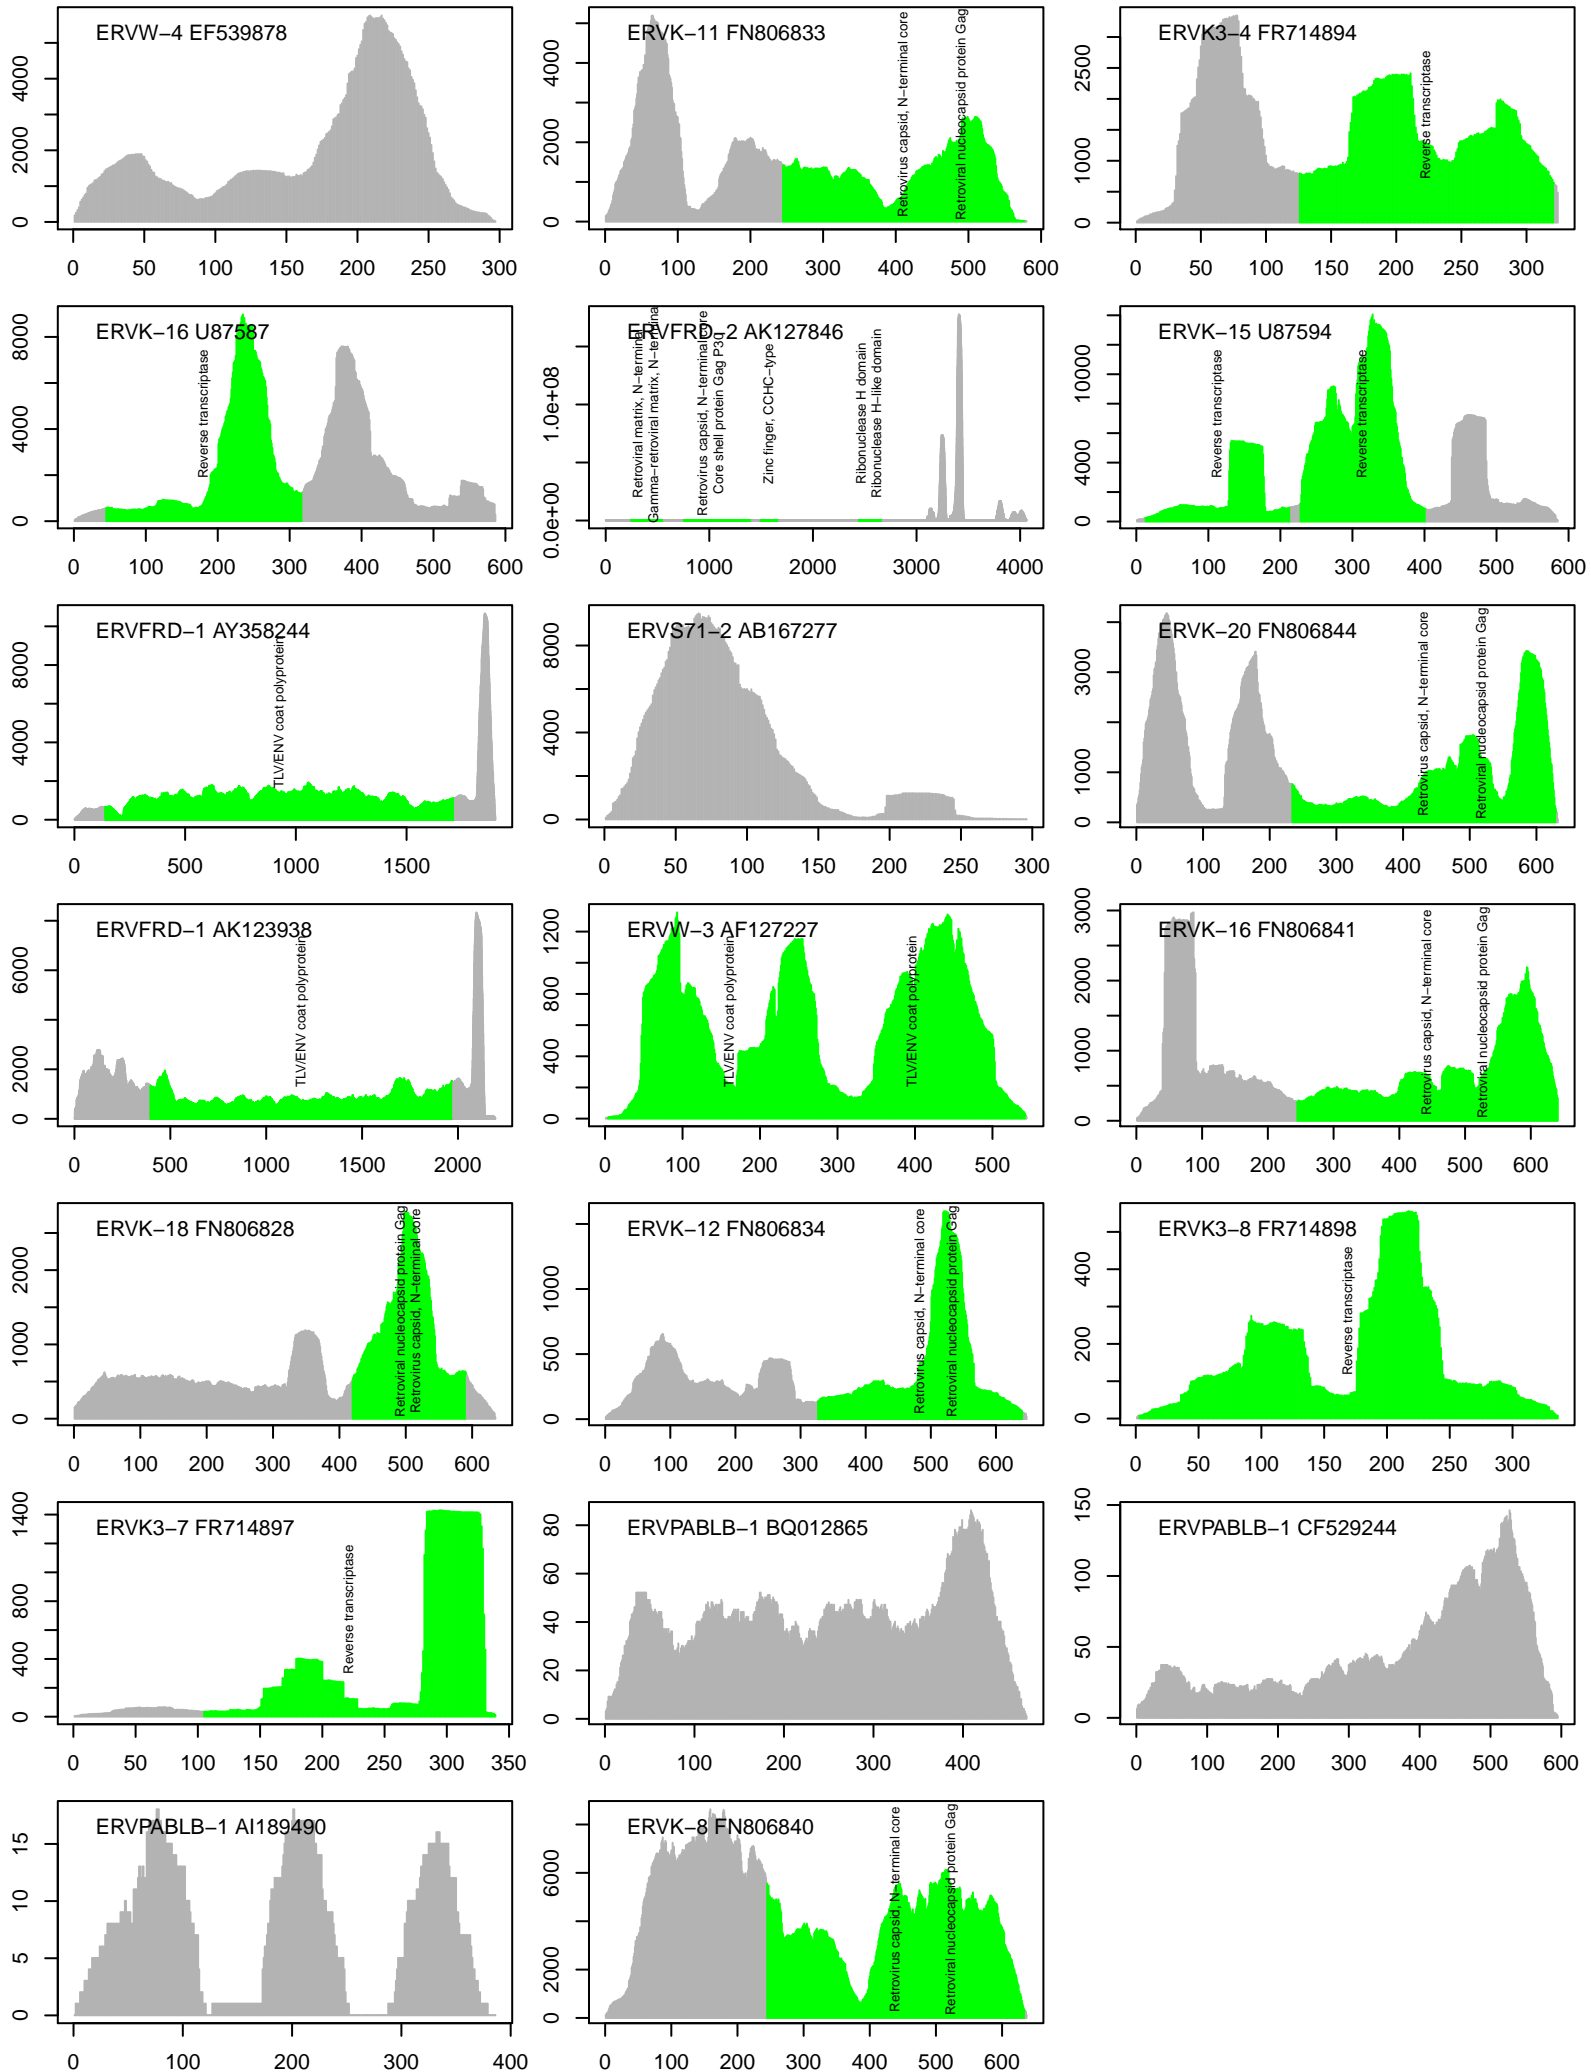

# Data 4SE

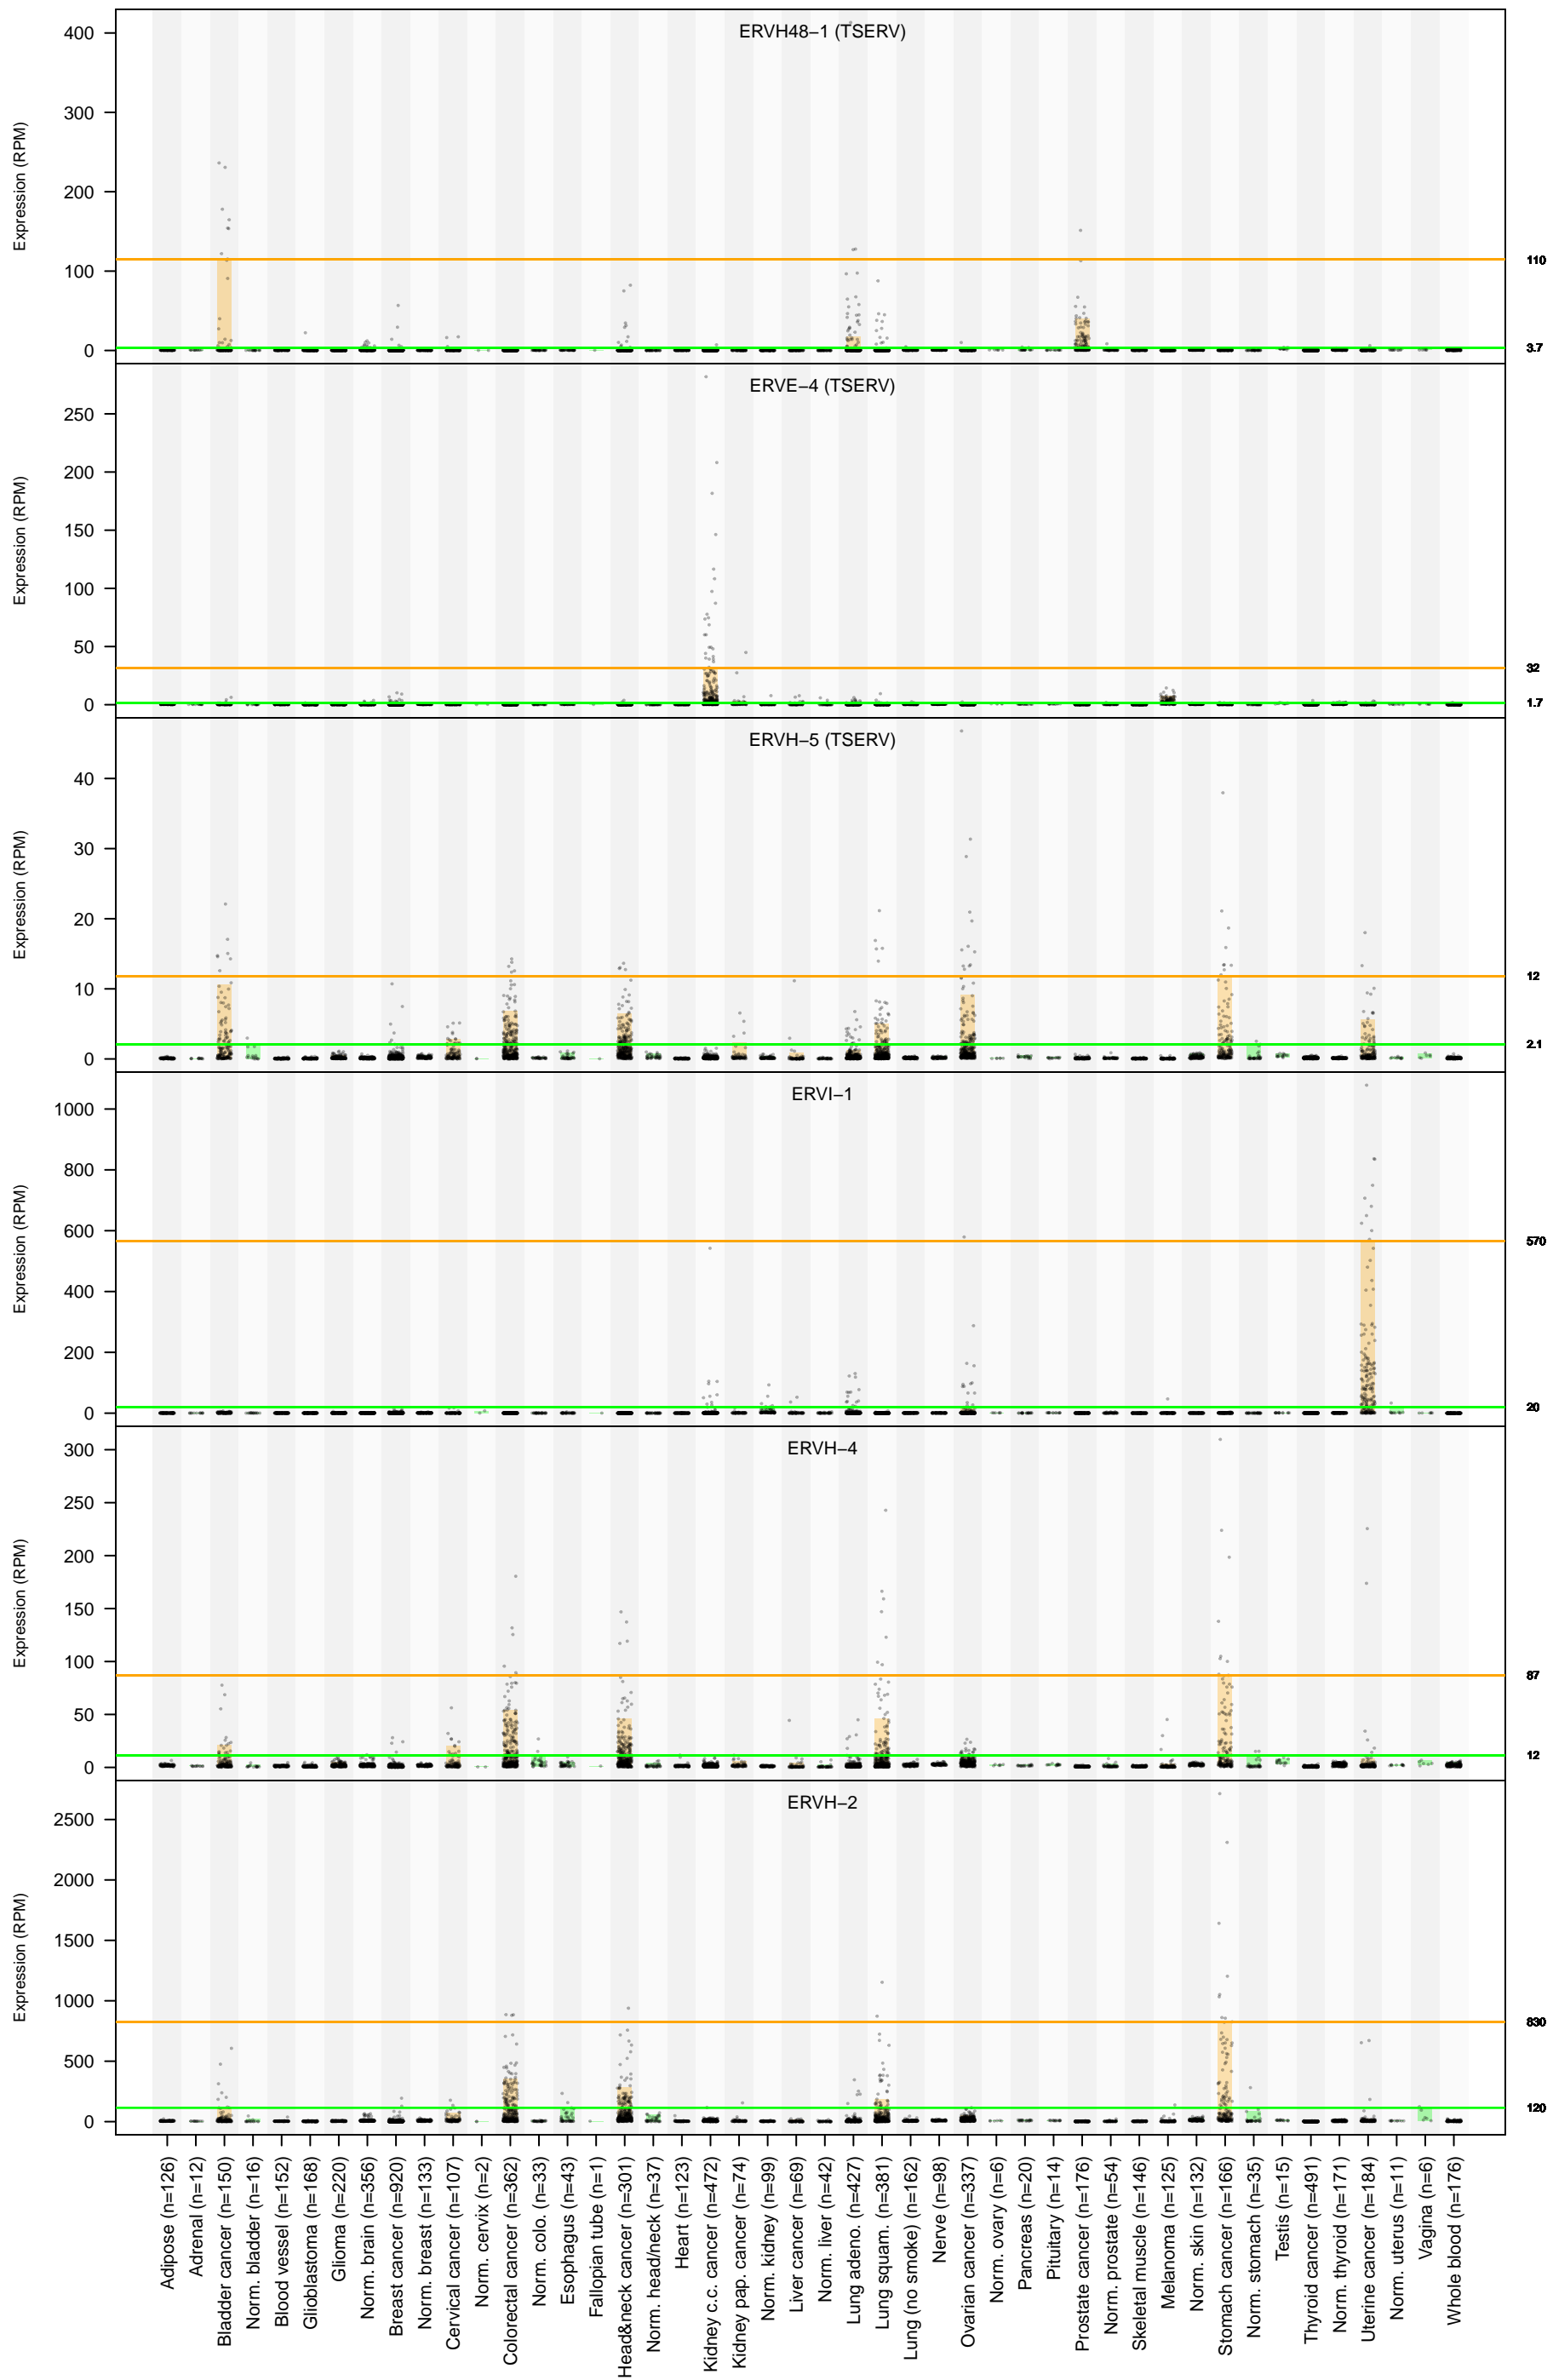

Data 4SE, cont...

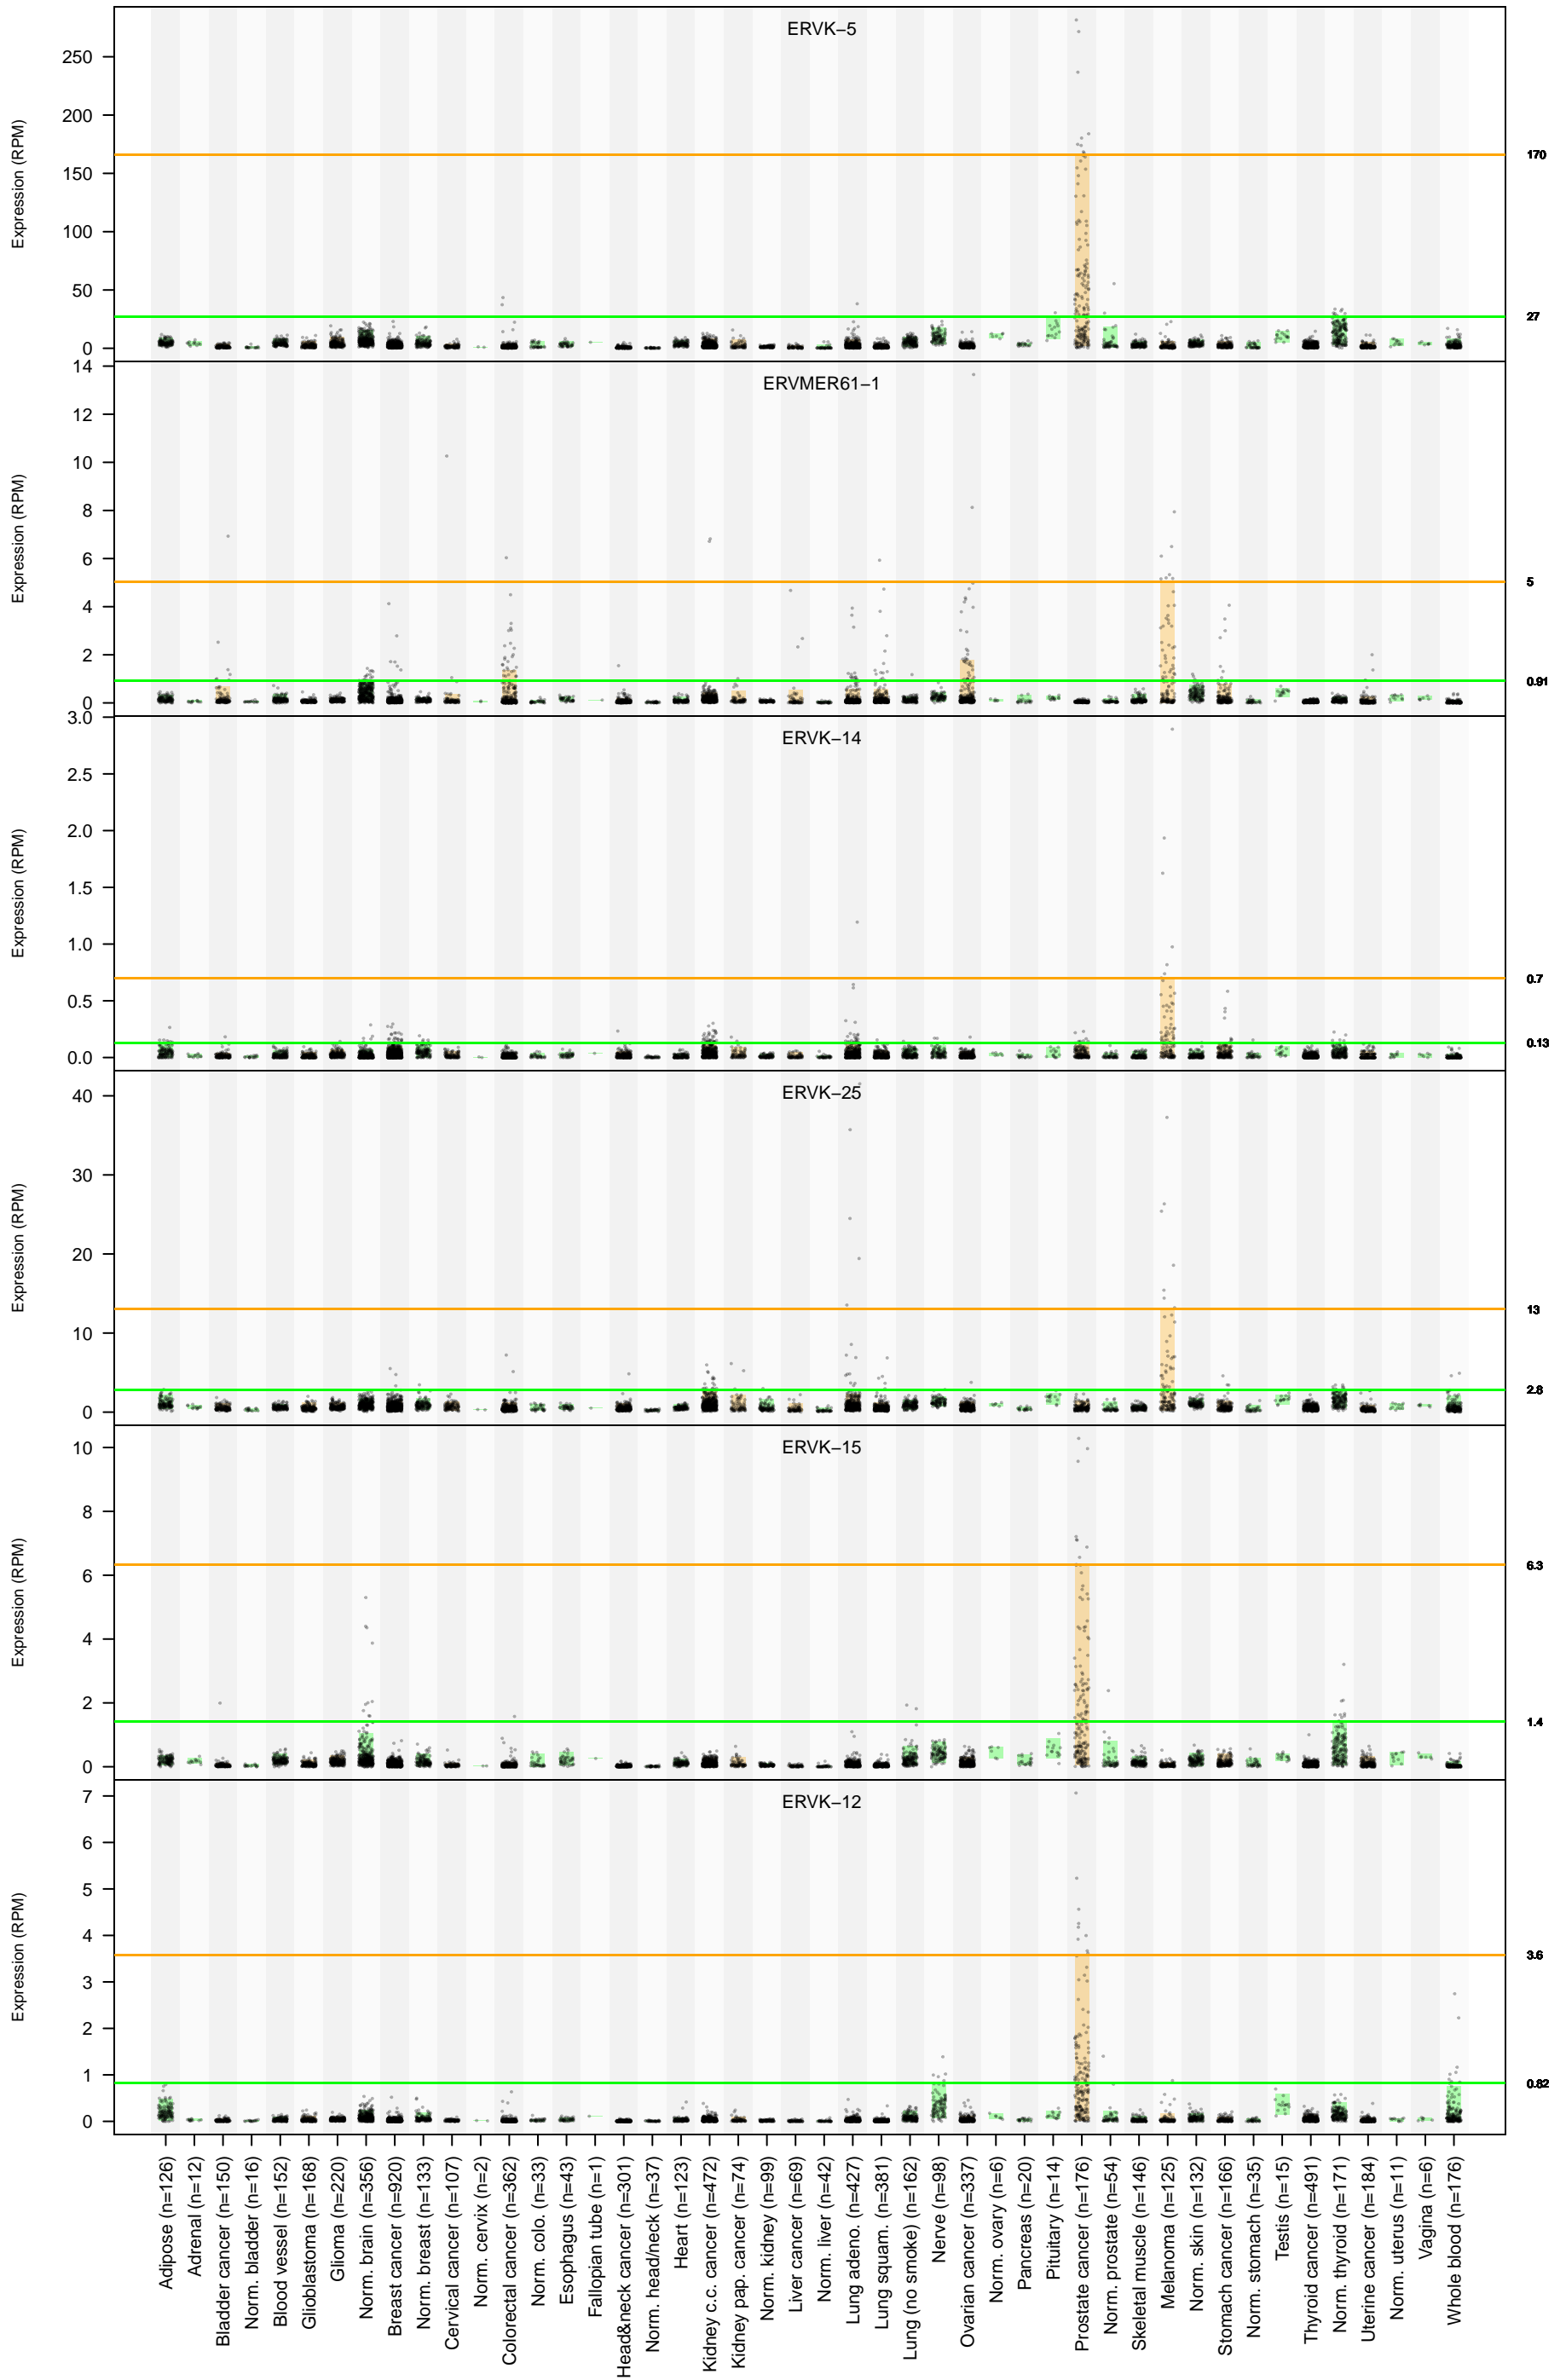

Data 4SE, cont...

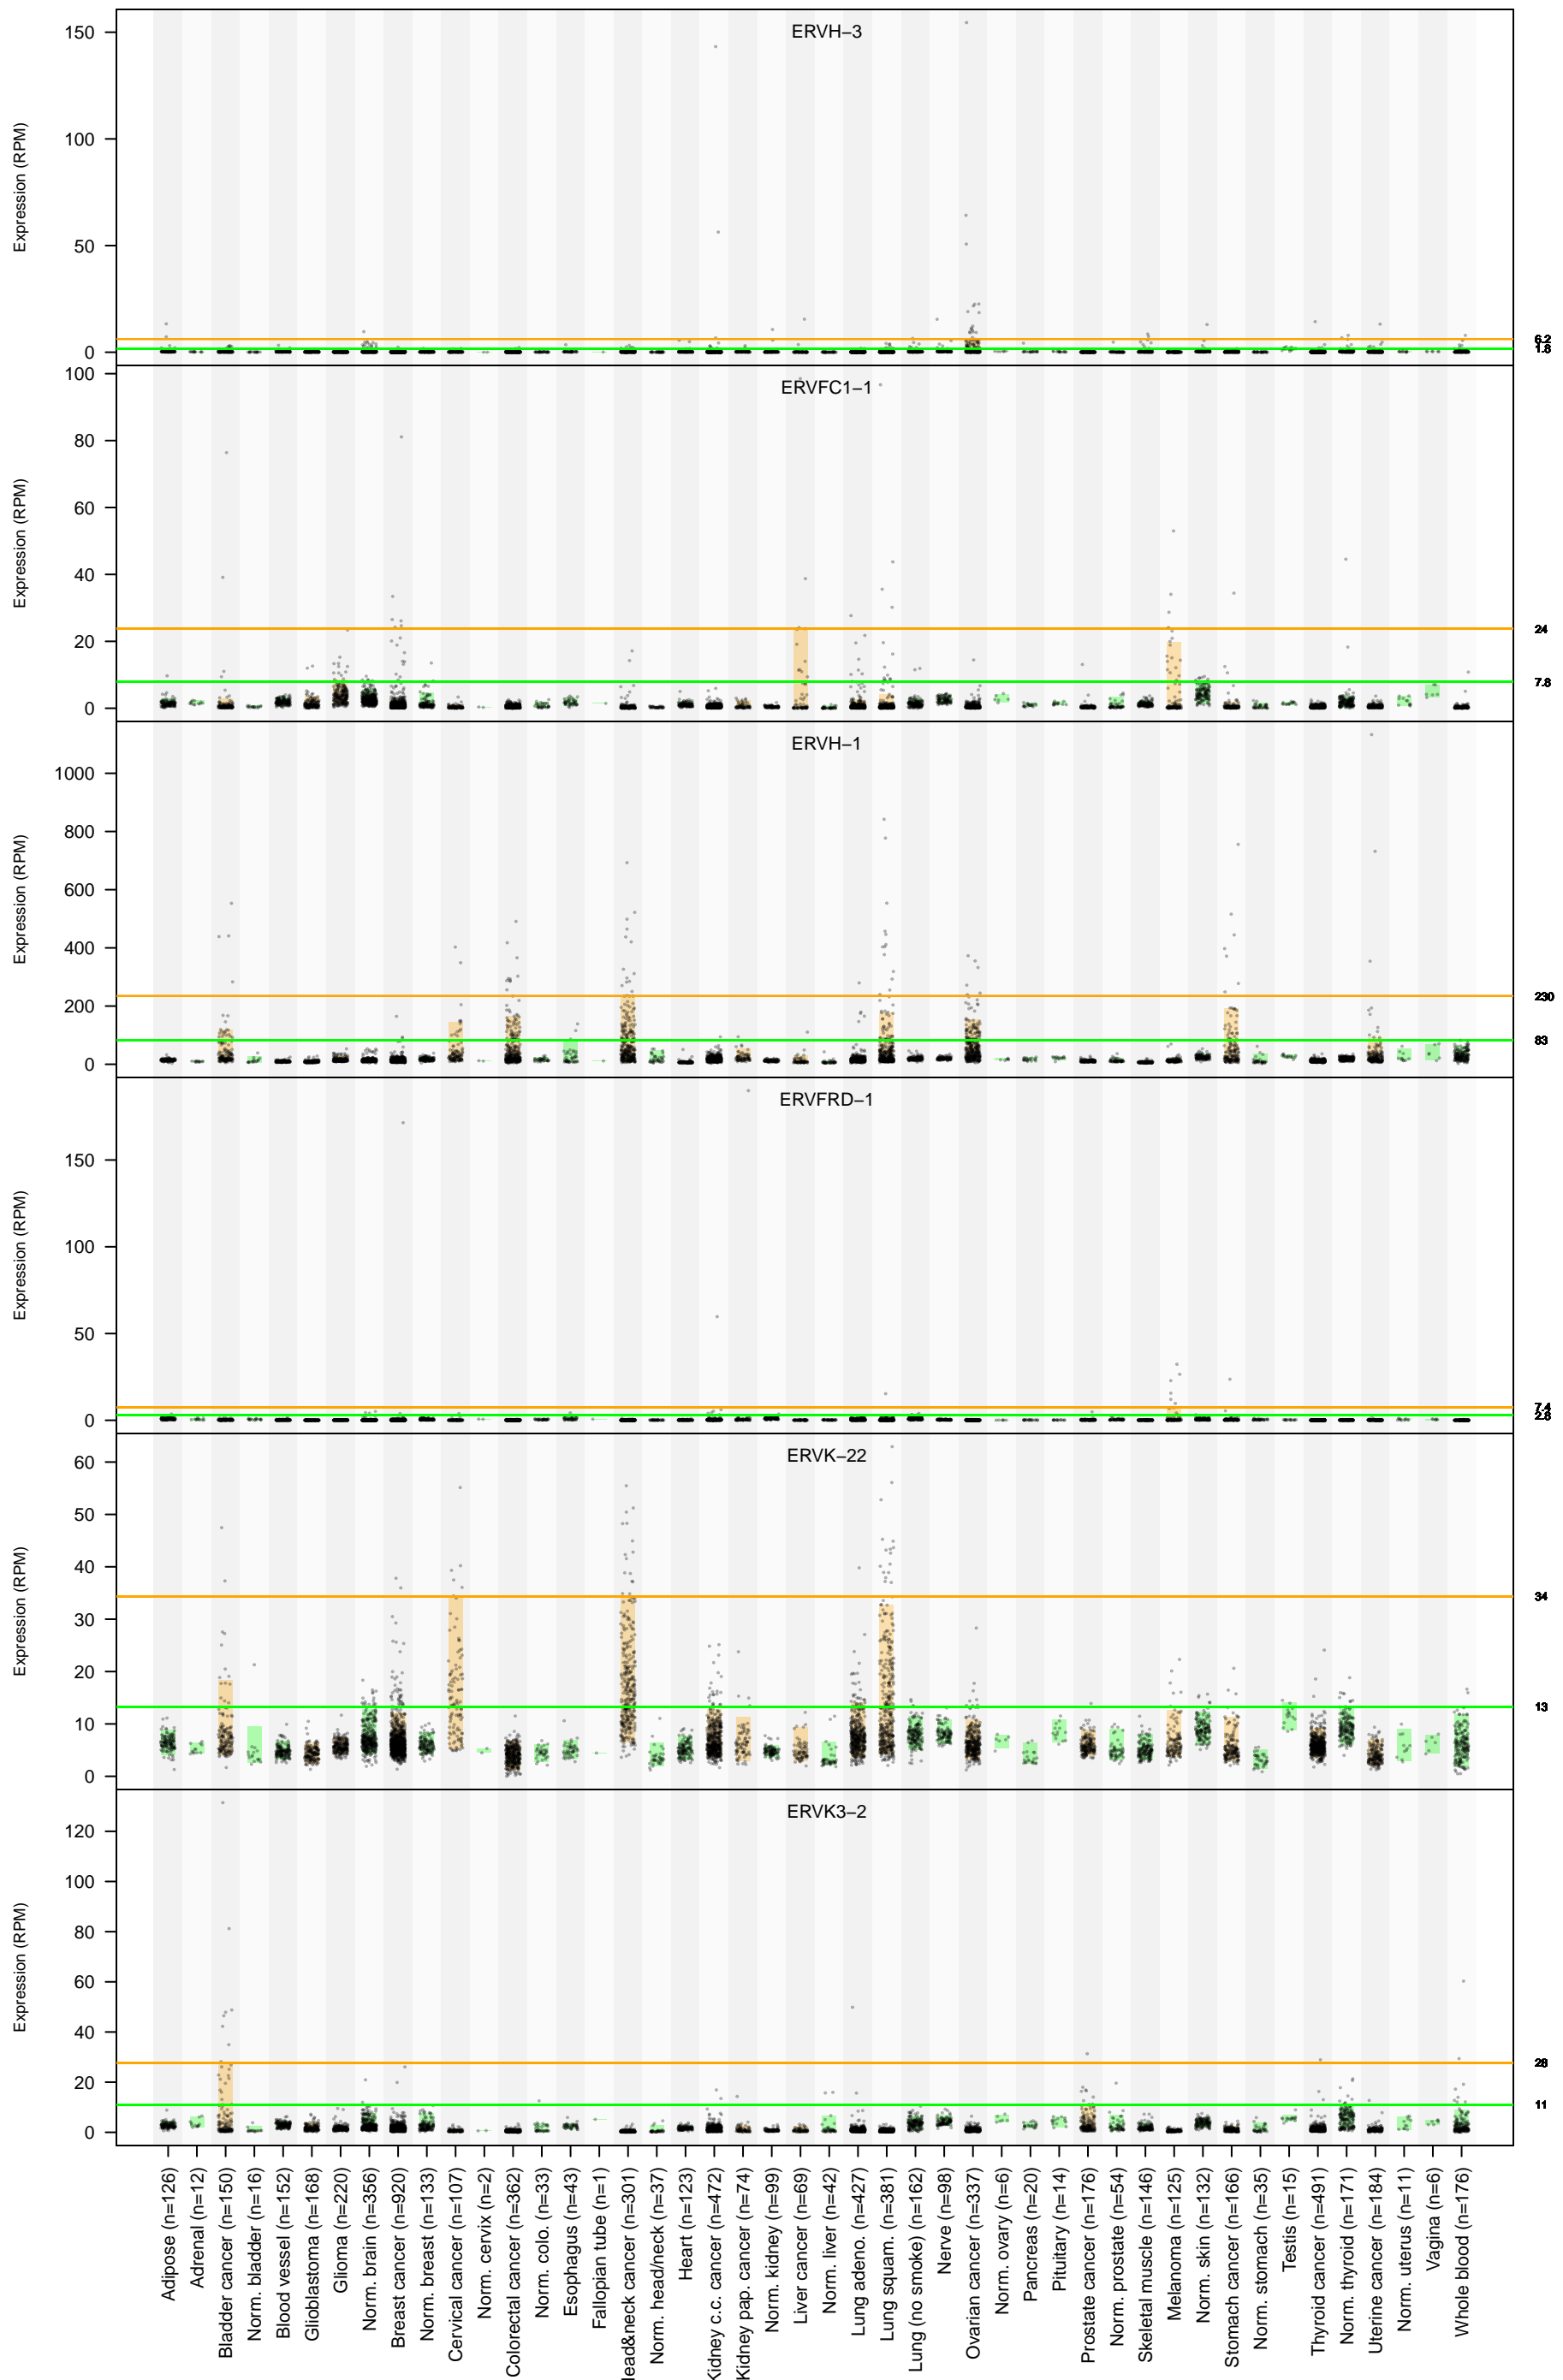



Data 4SE, cont...

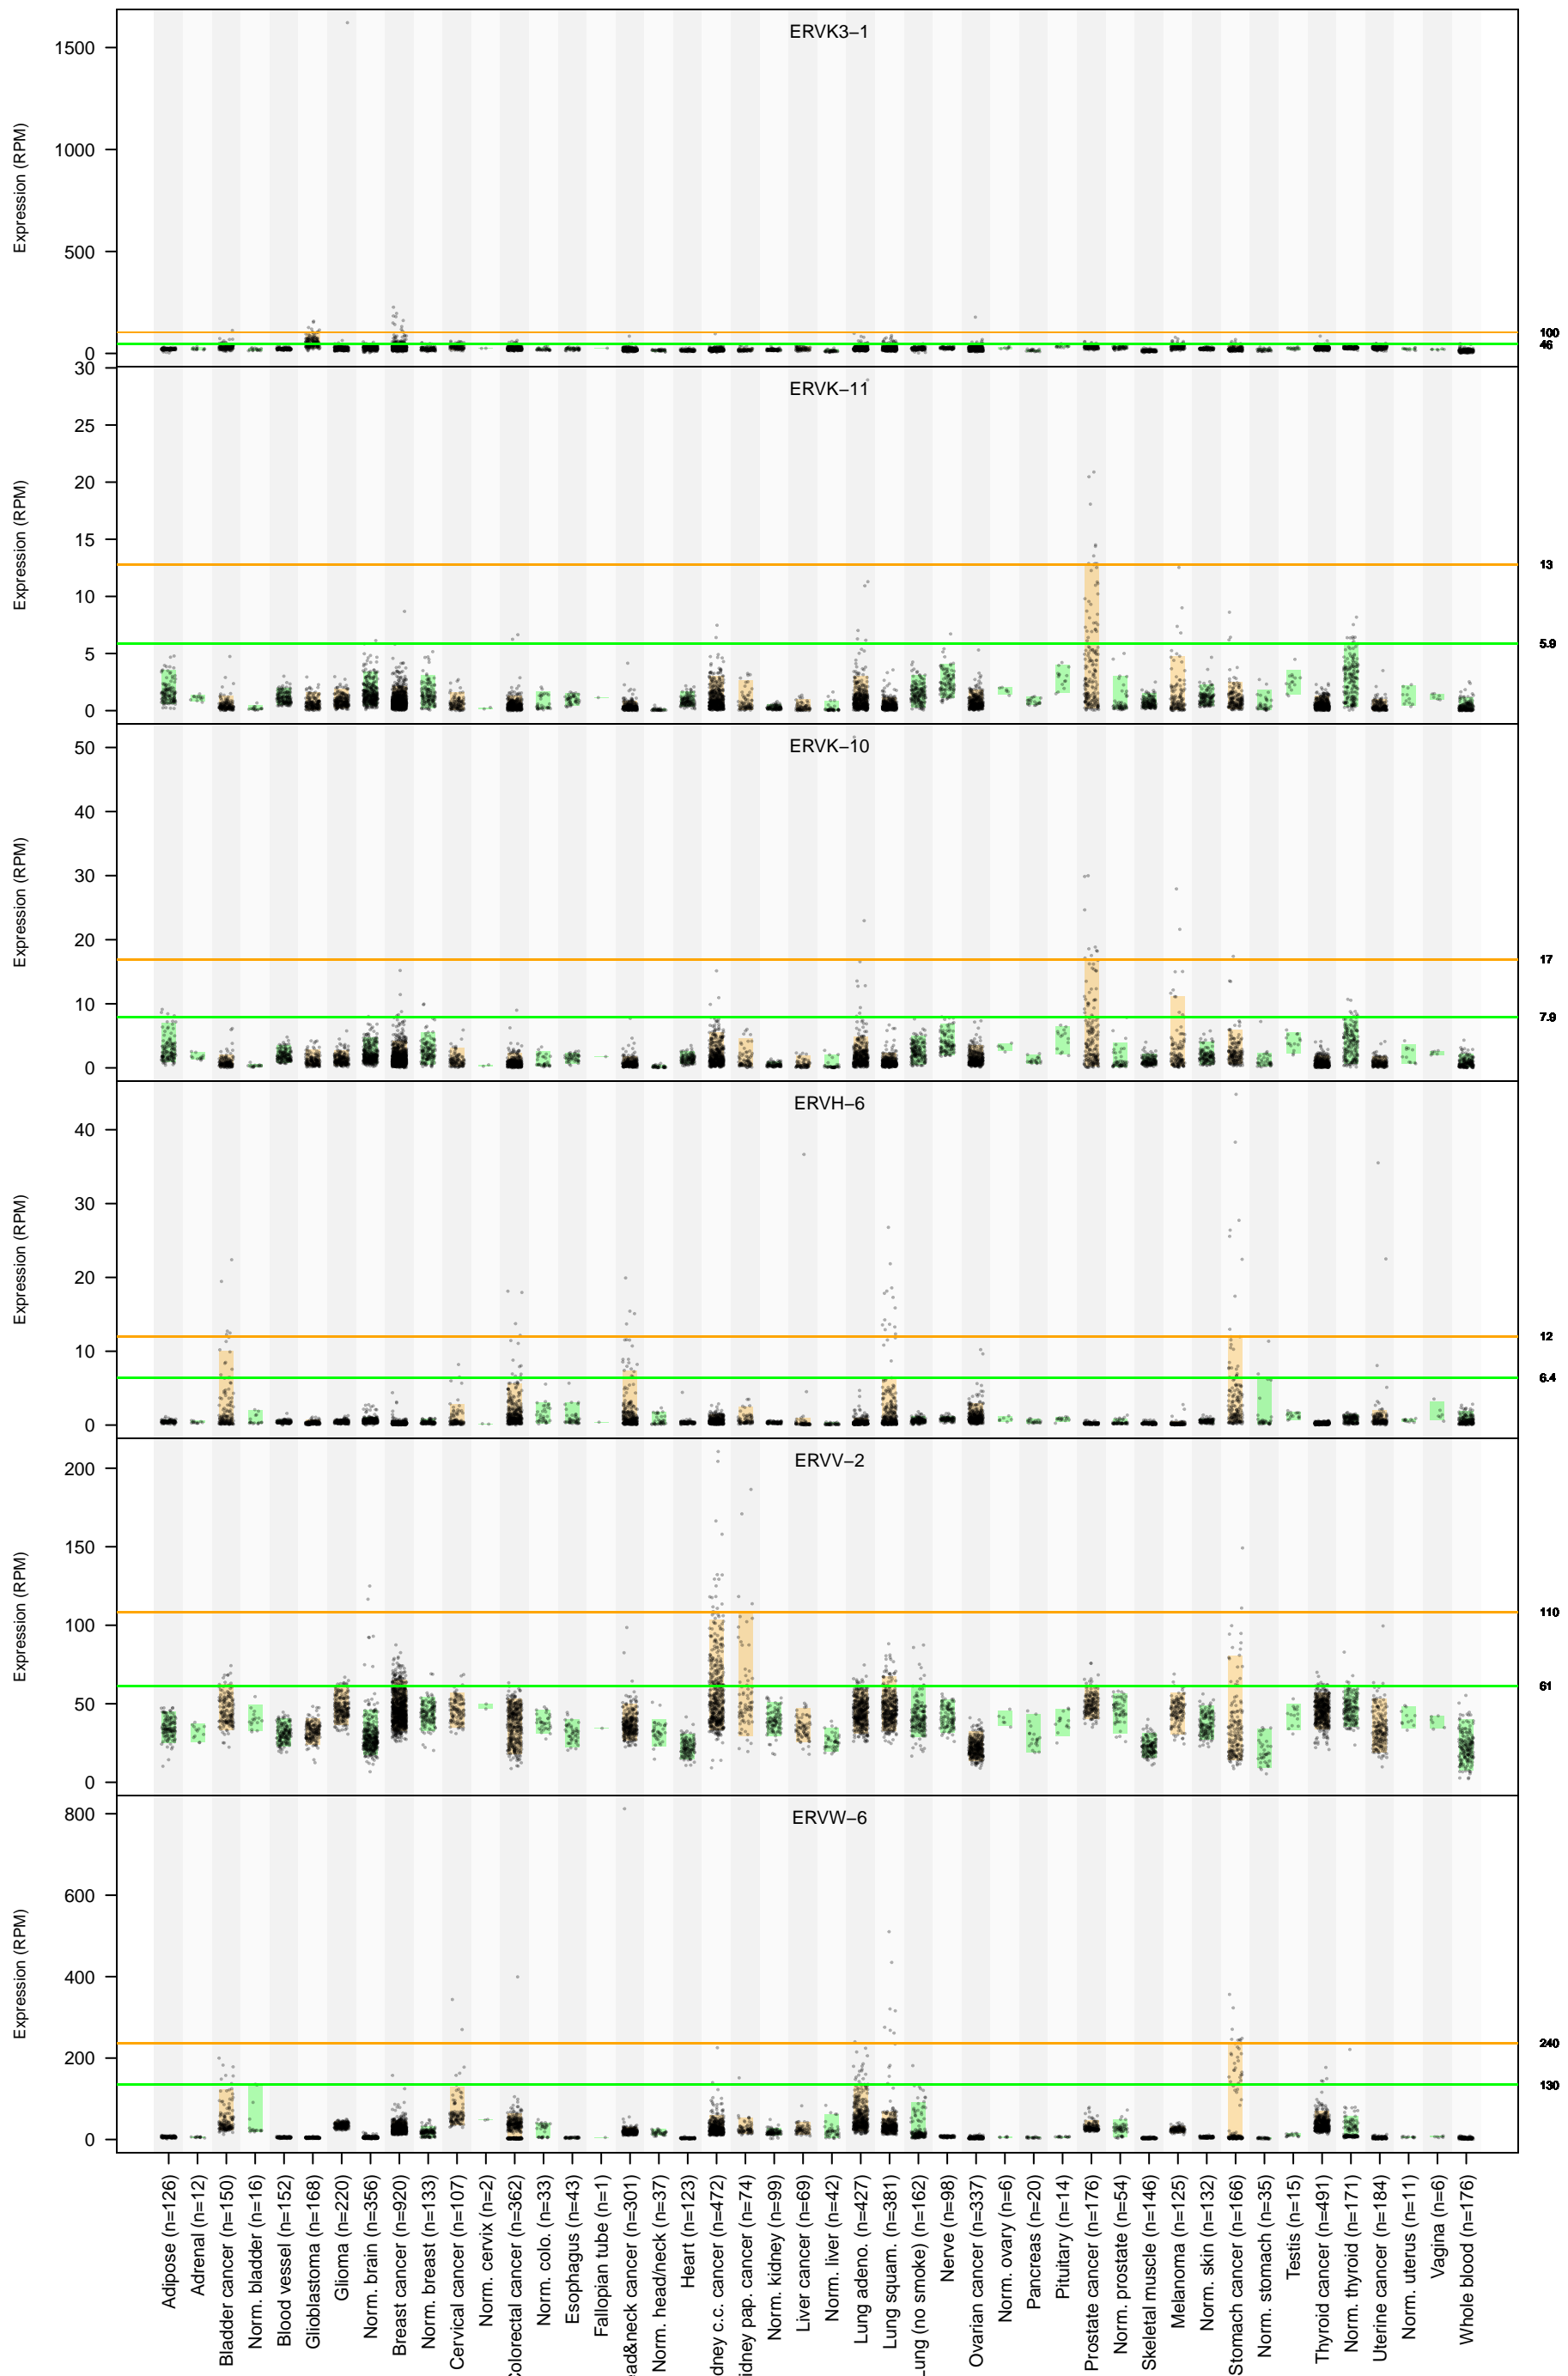

Data 4SE, cont...

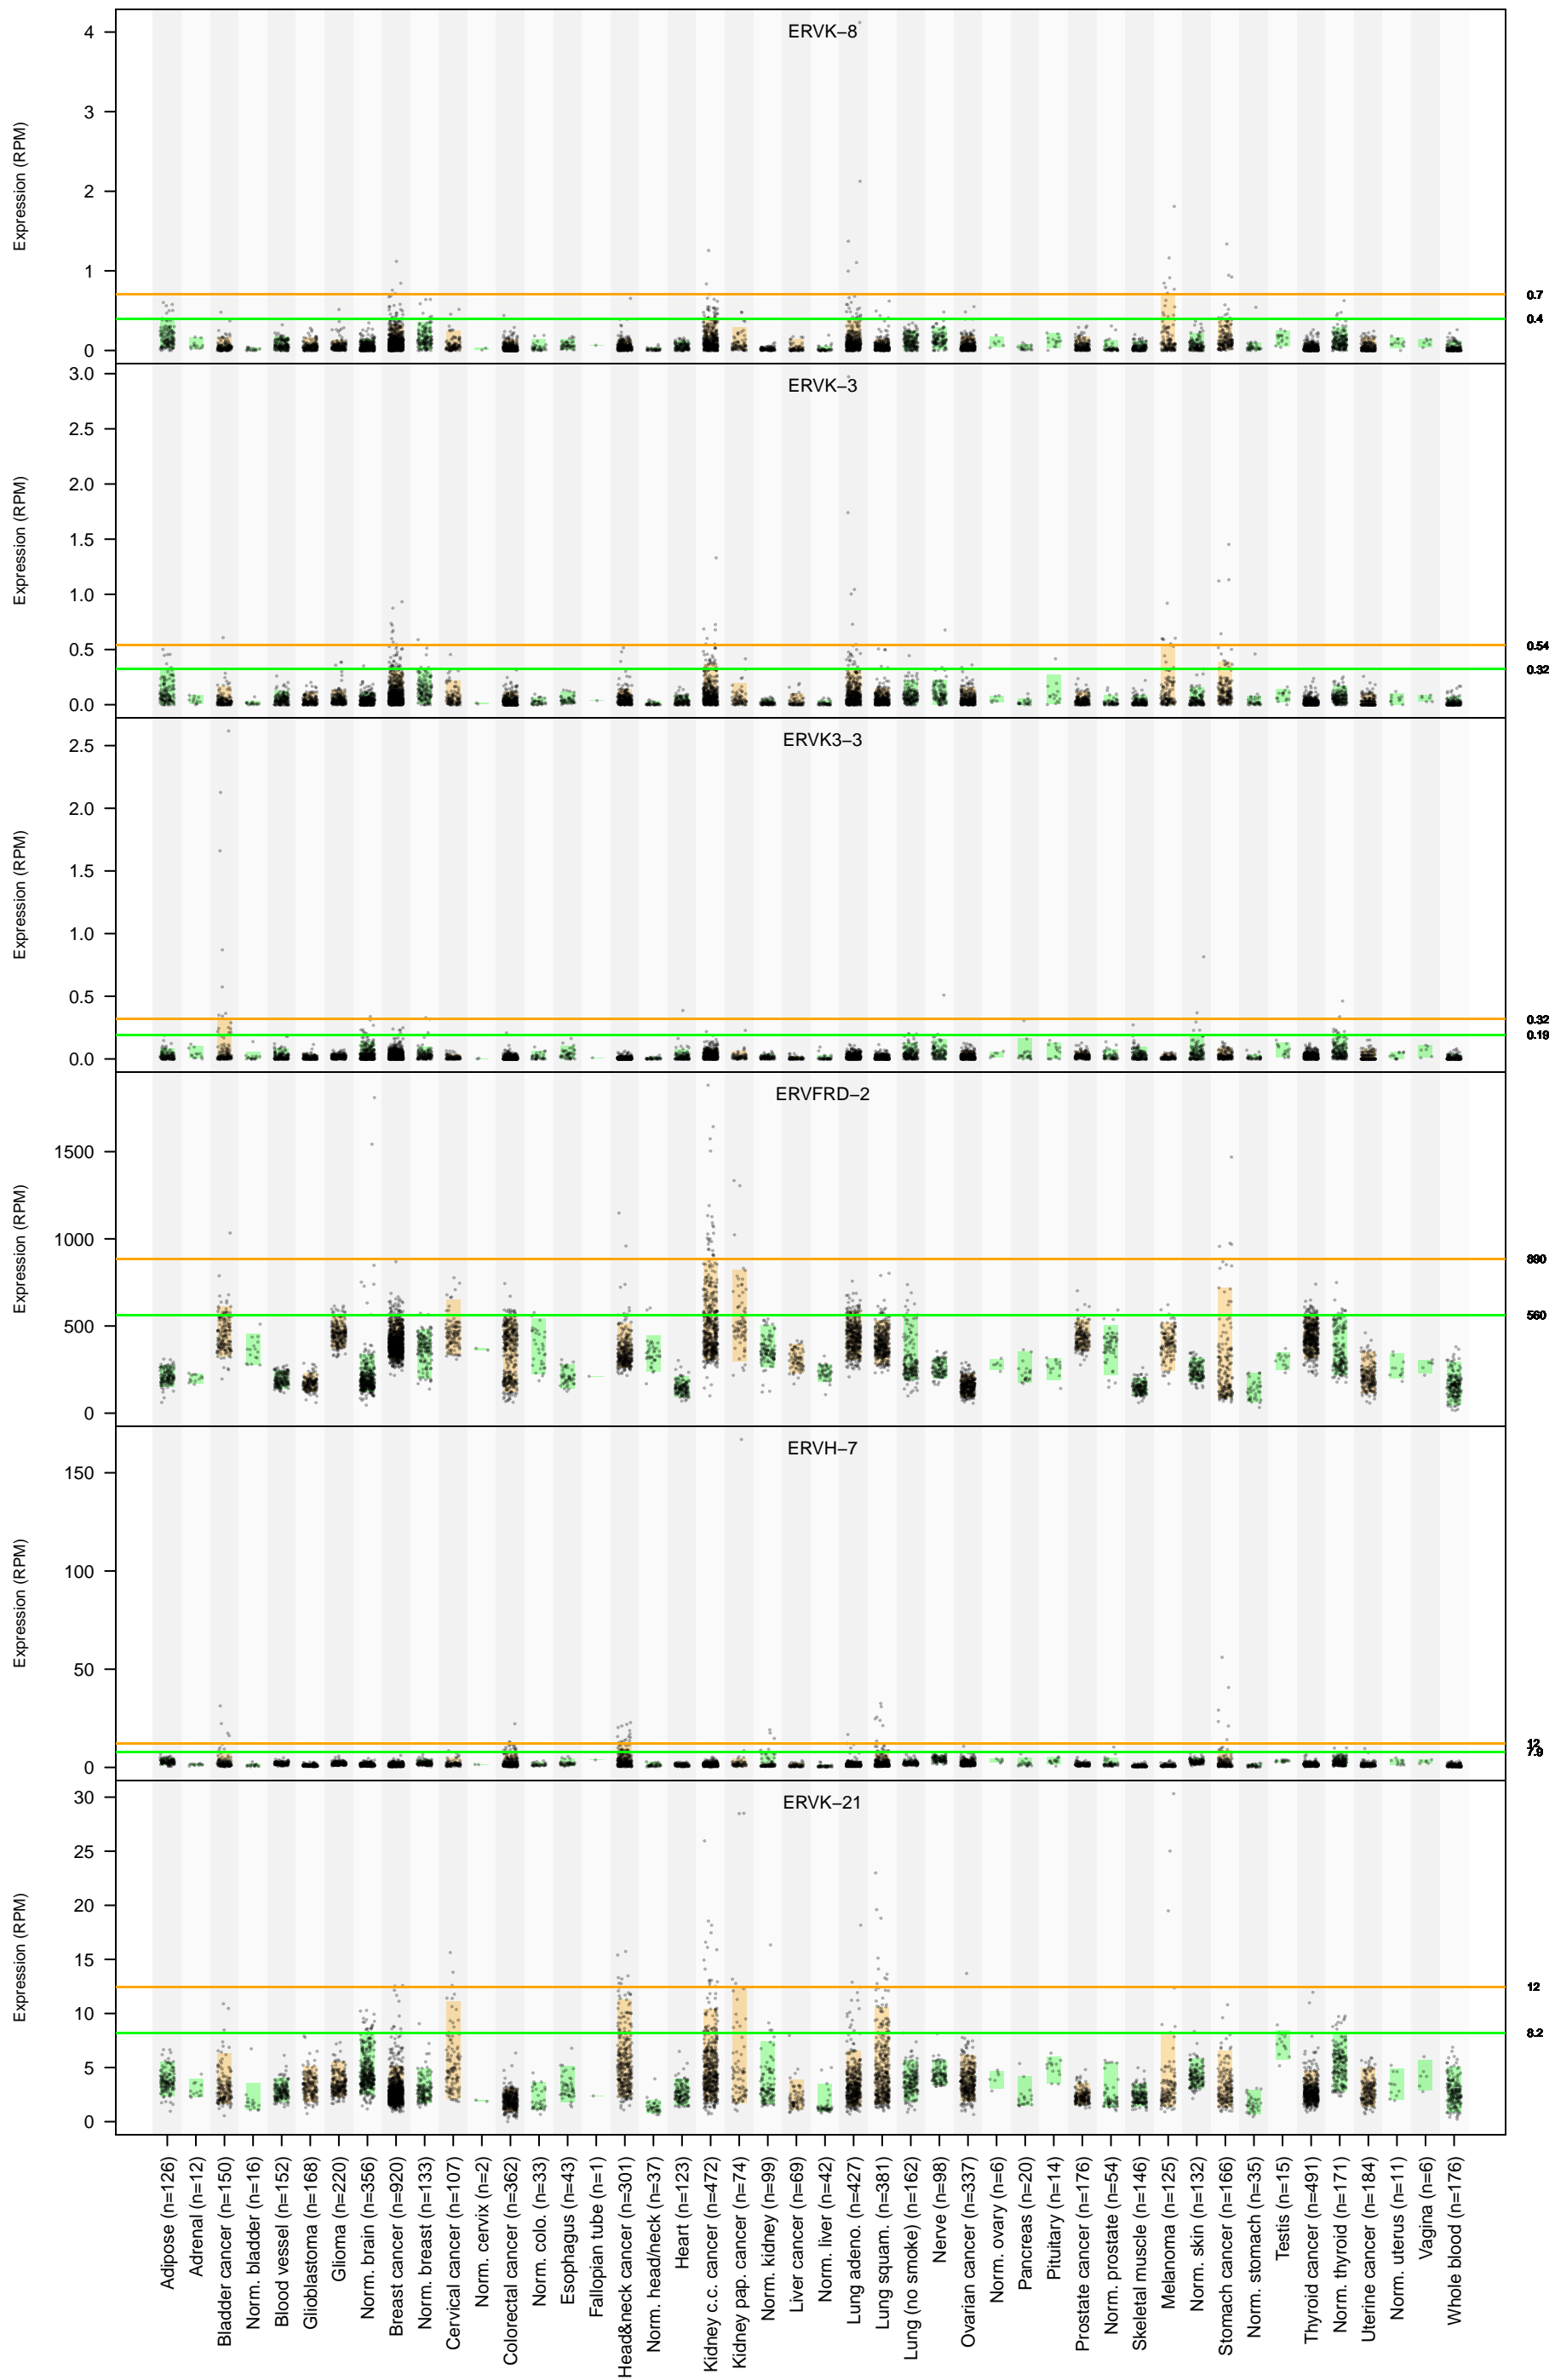

Data 4SE, cont...

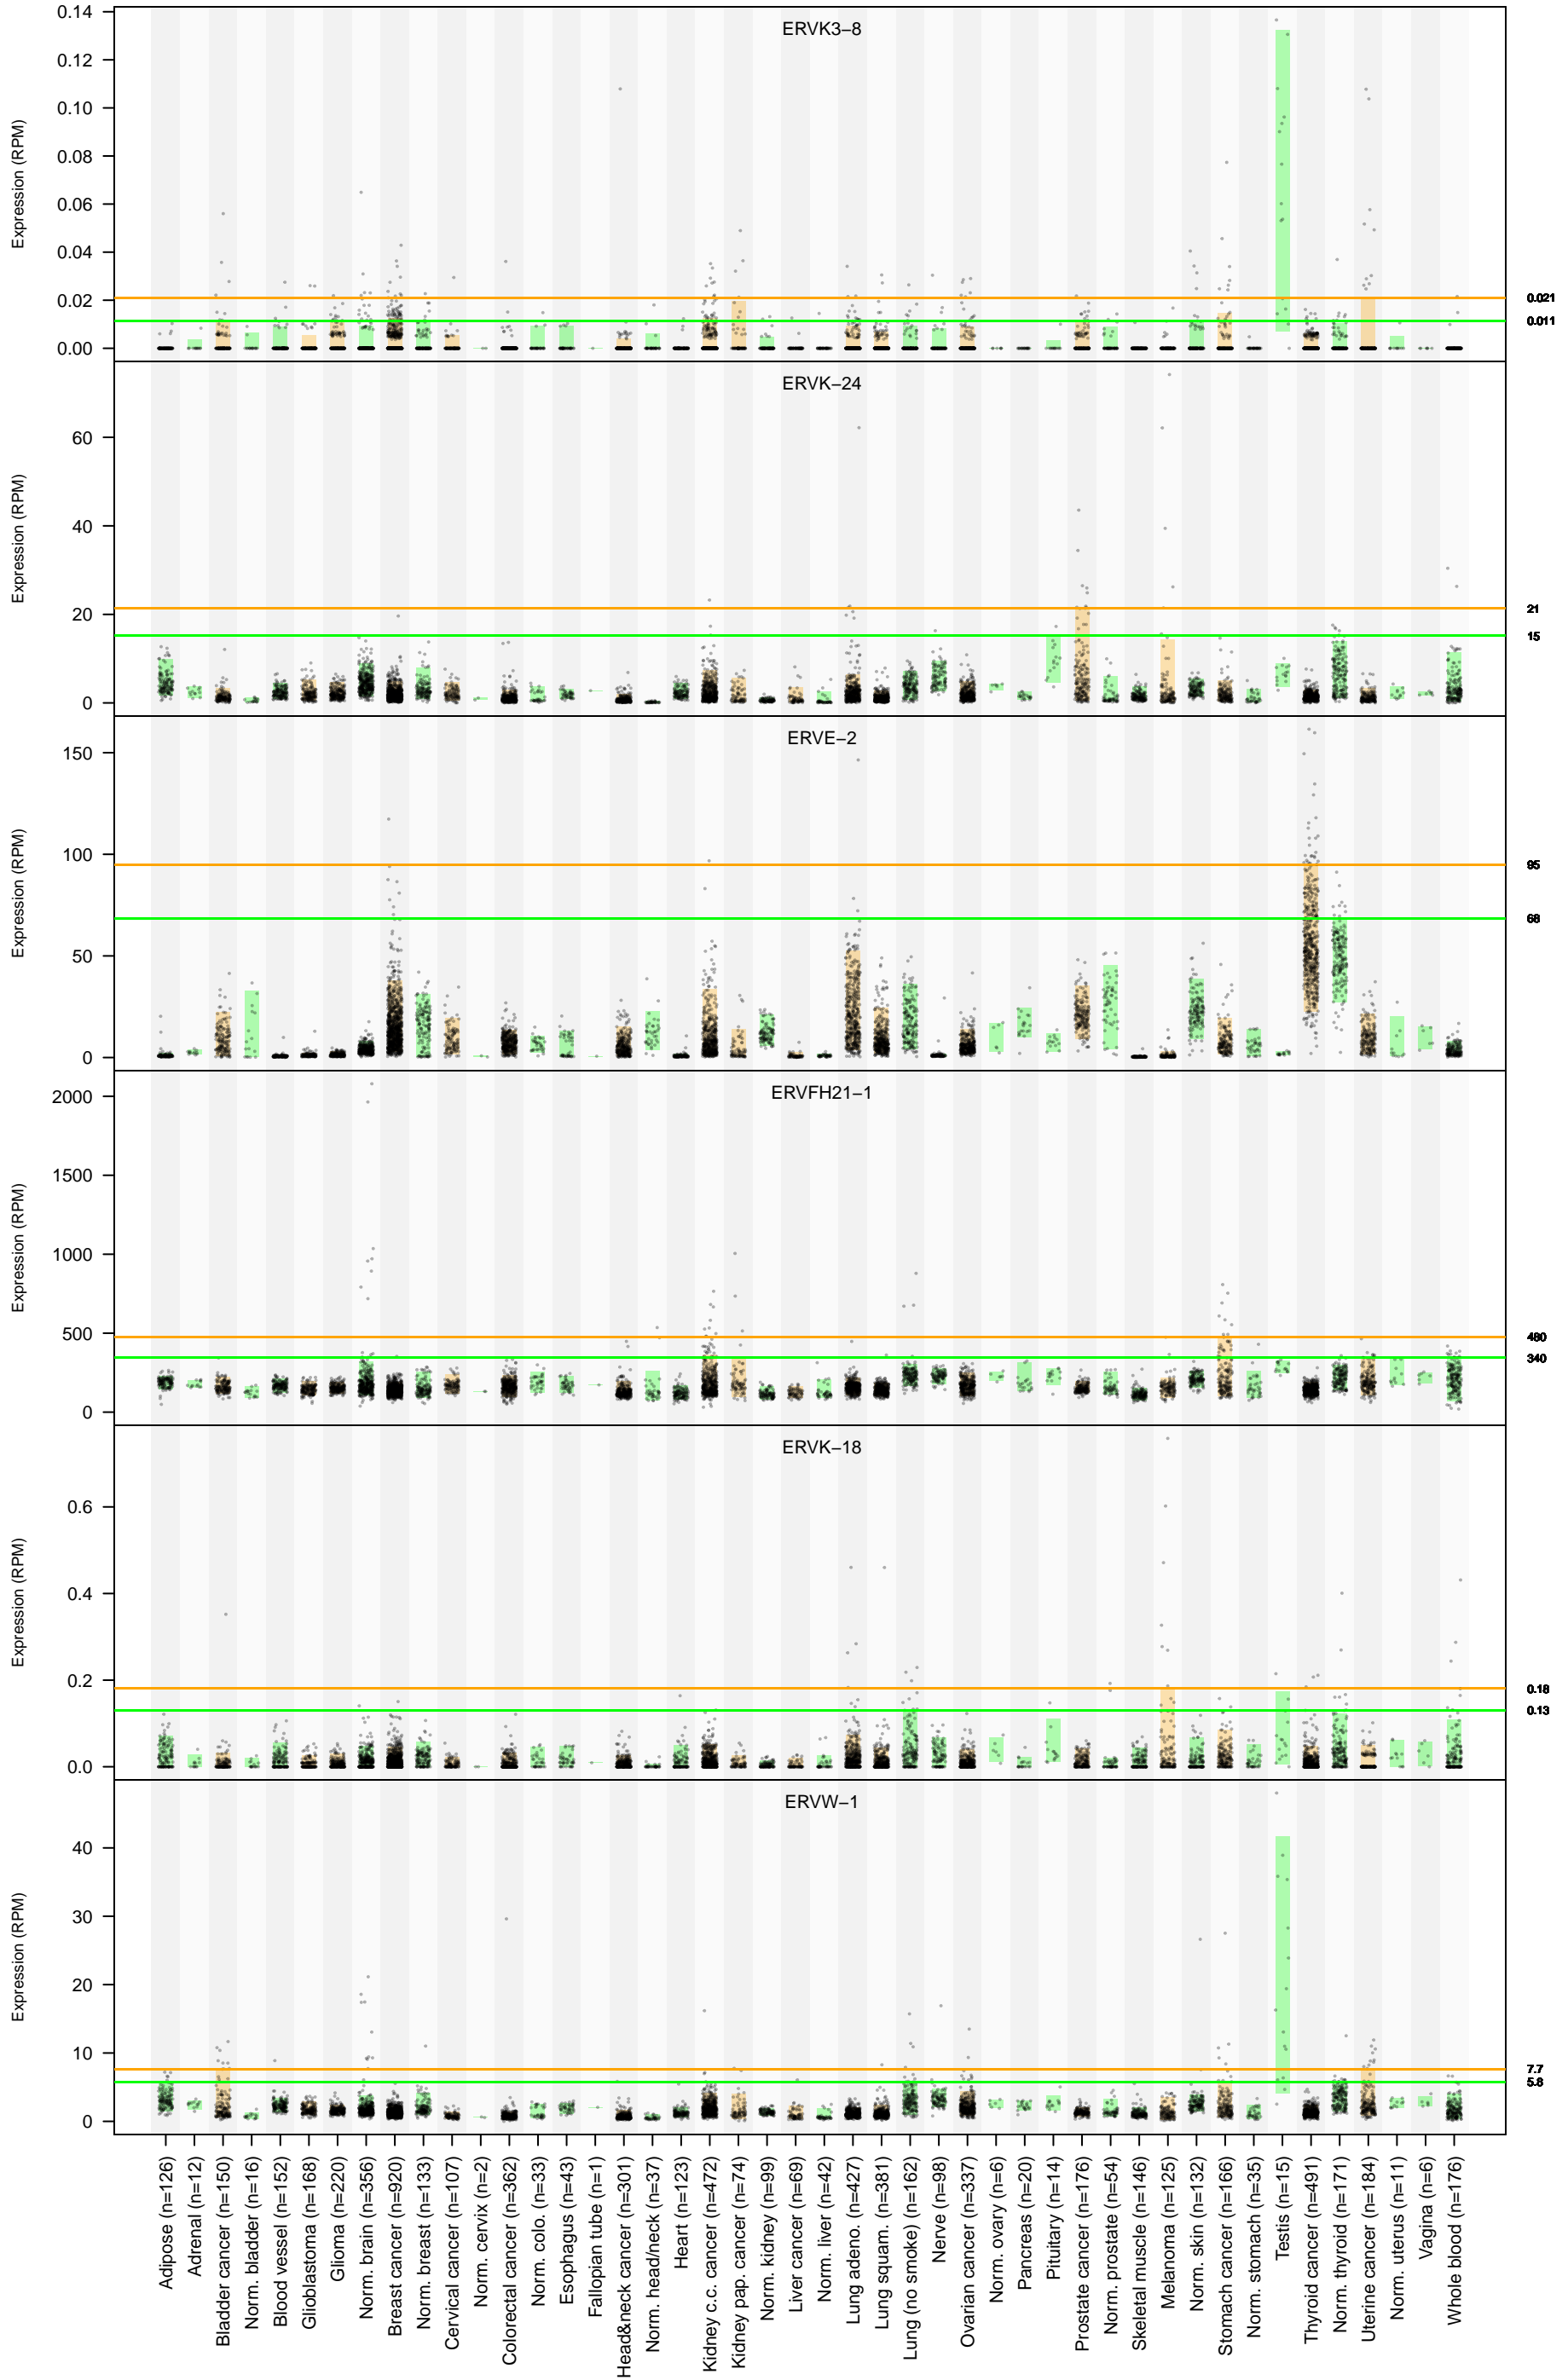

Data 4SE, cont...

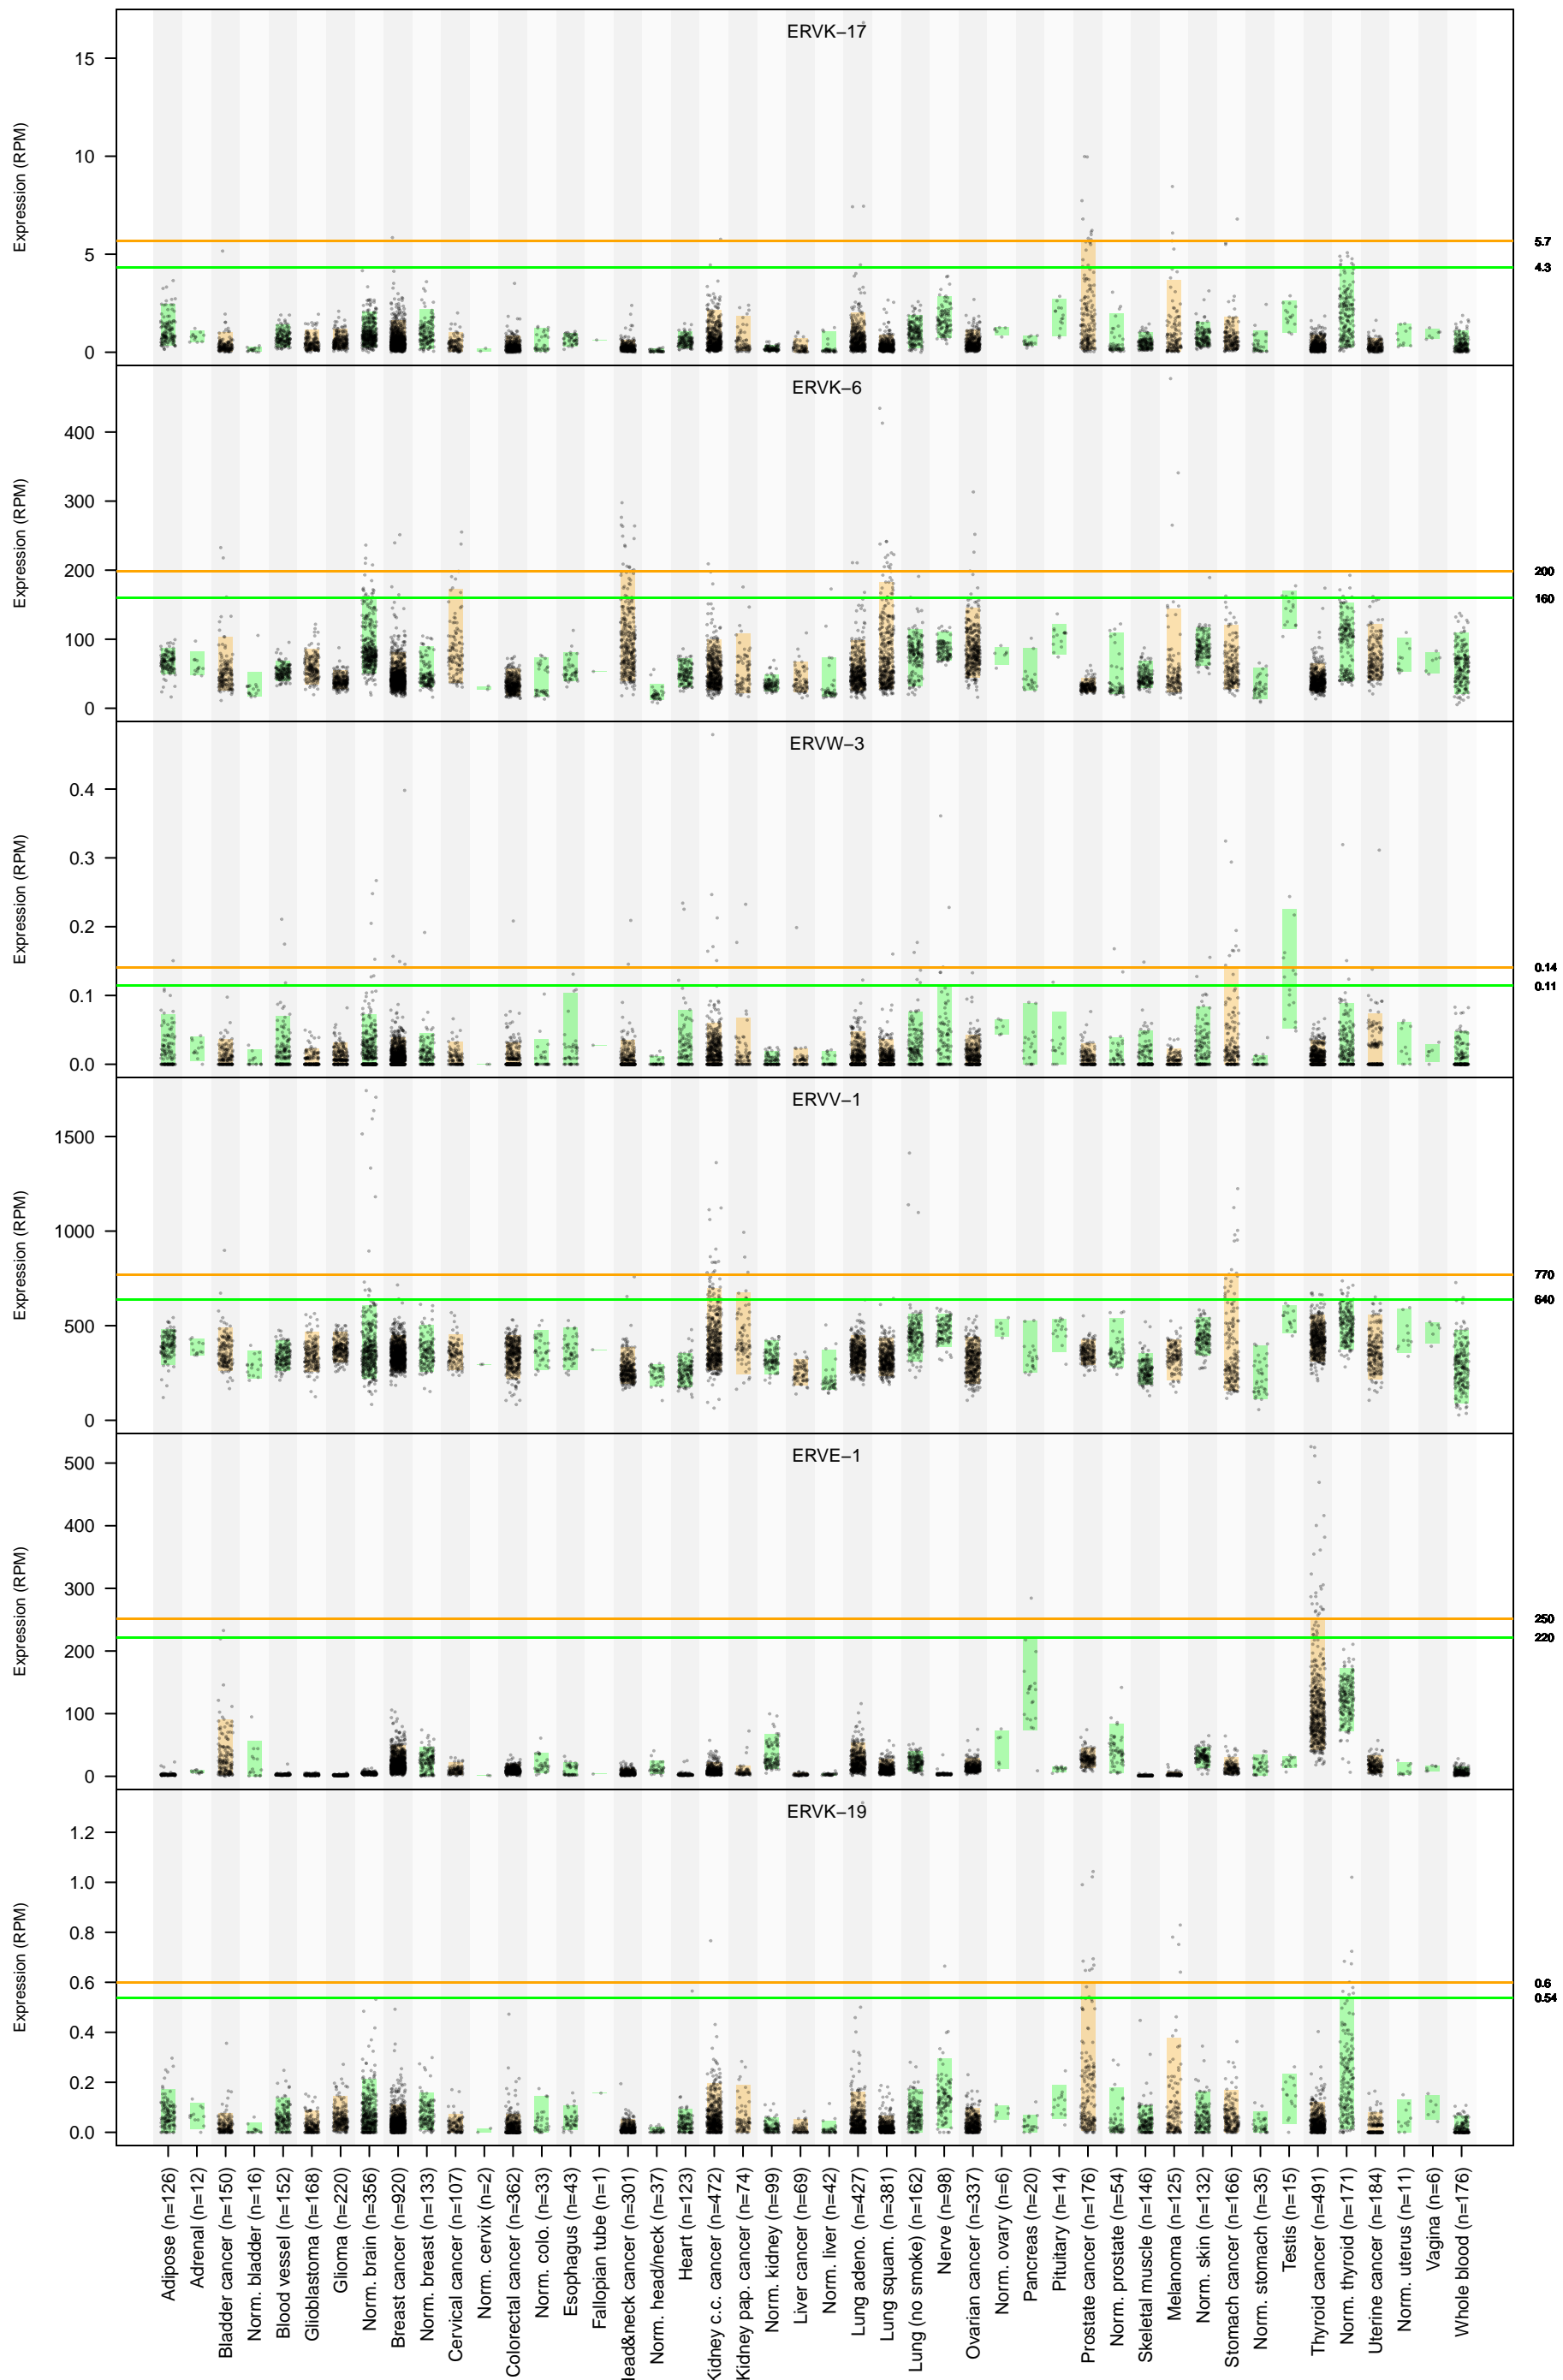

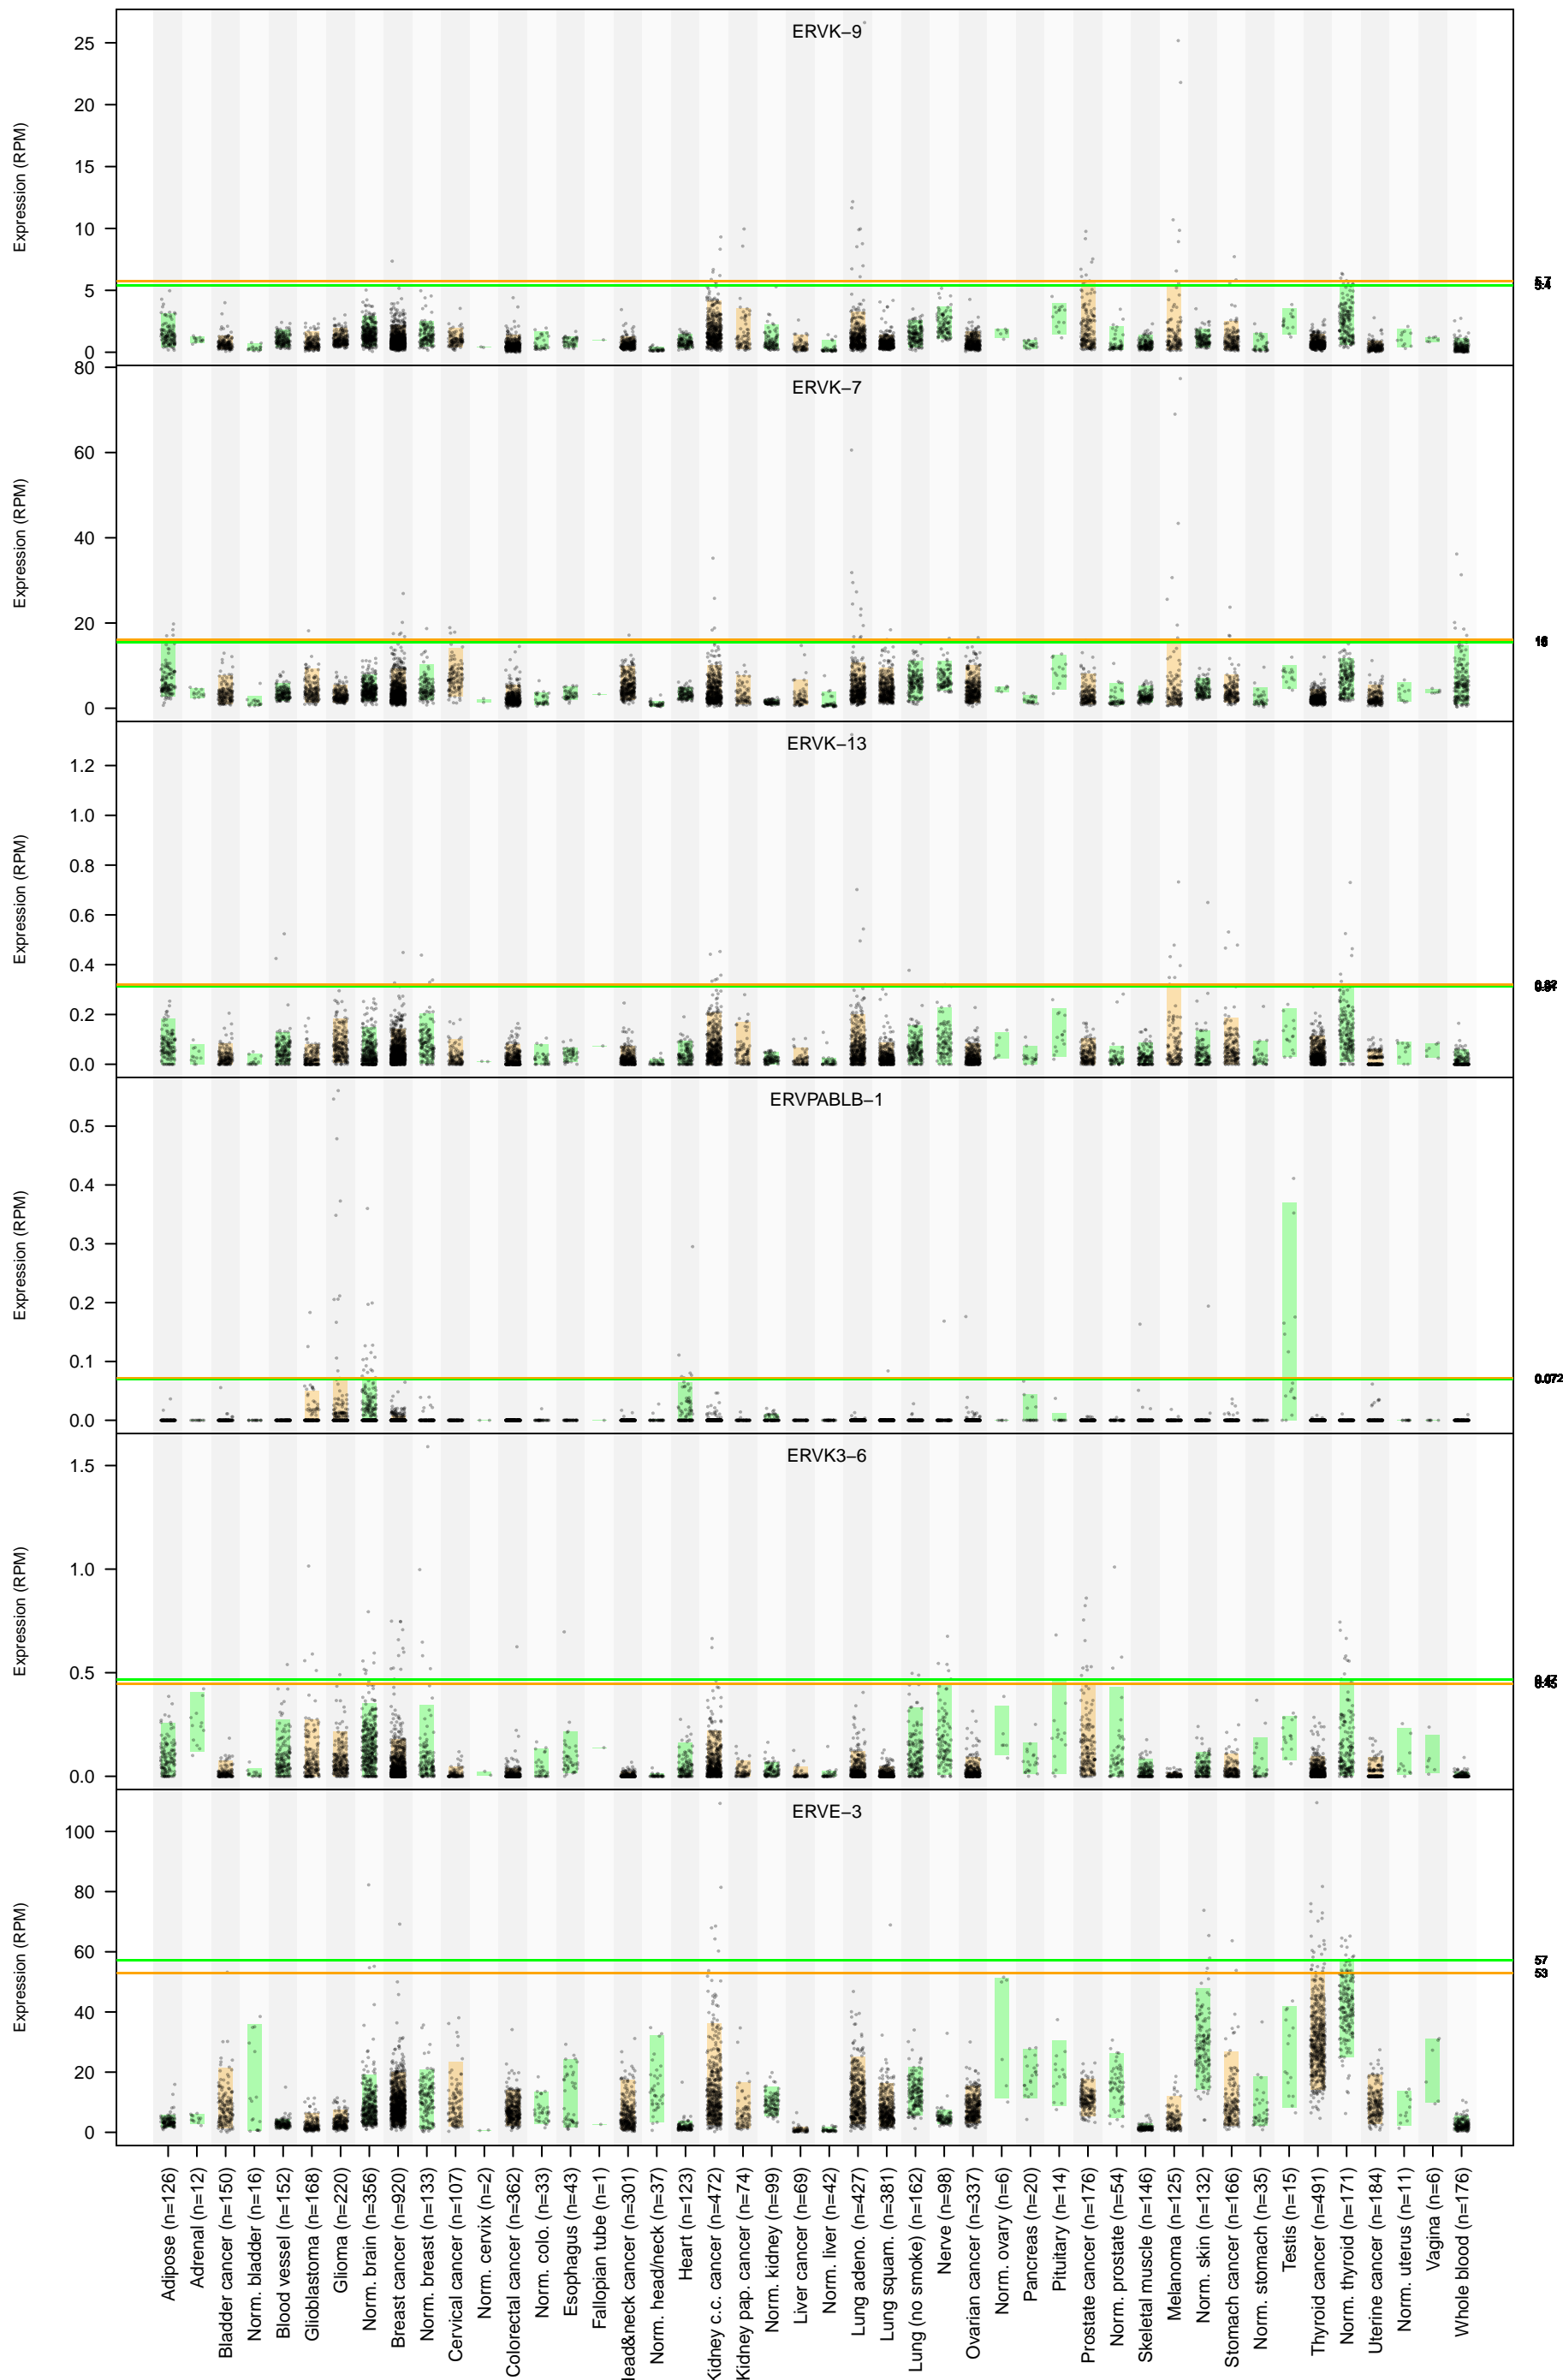



Data 4SE, cont...

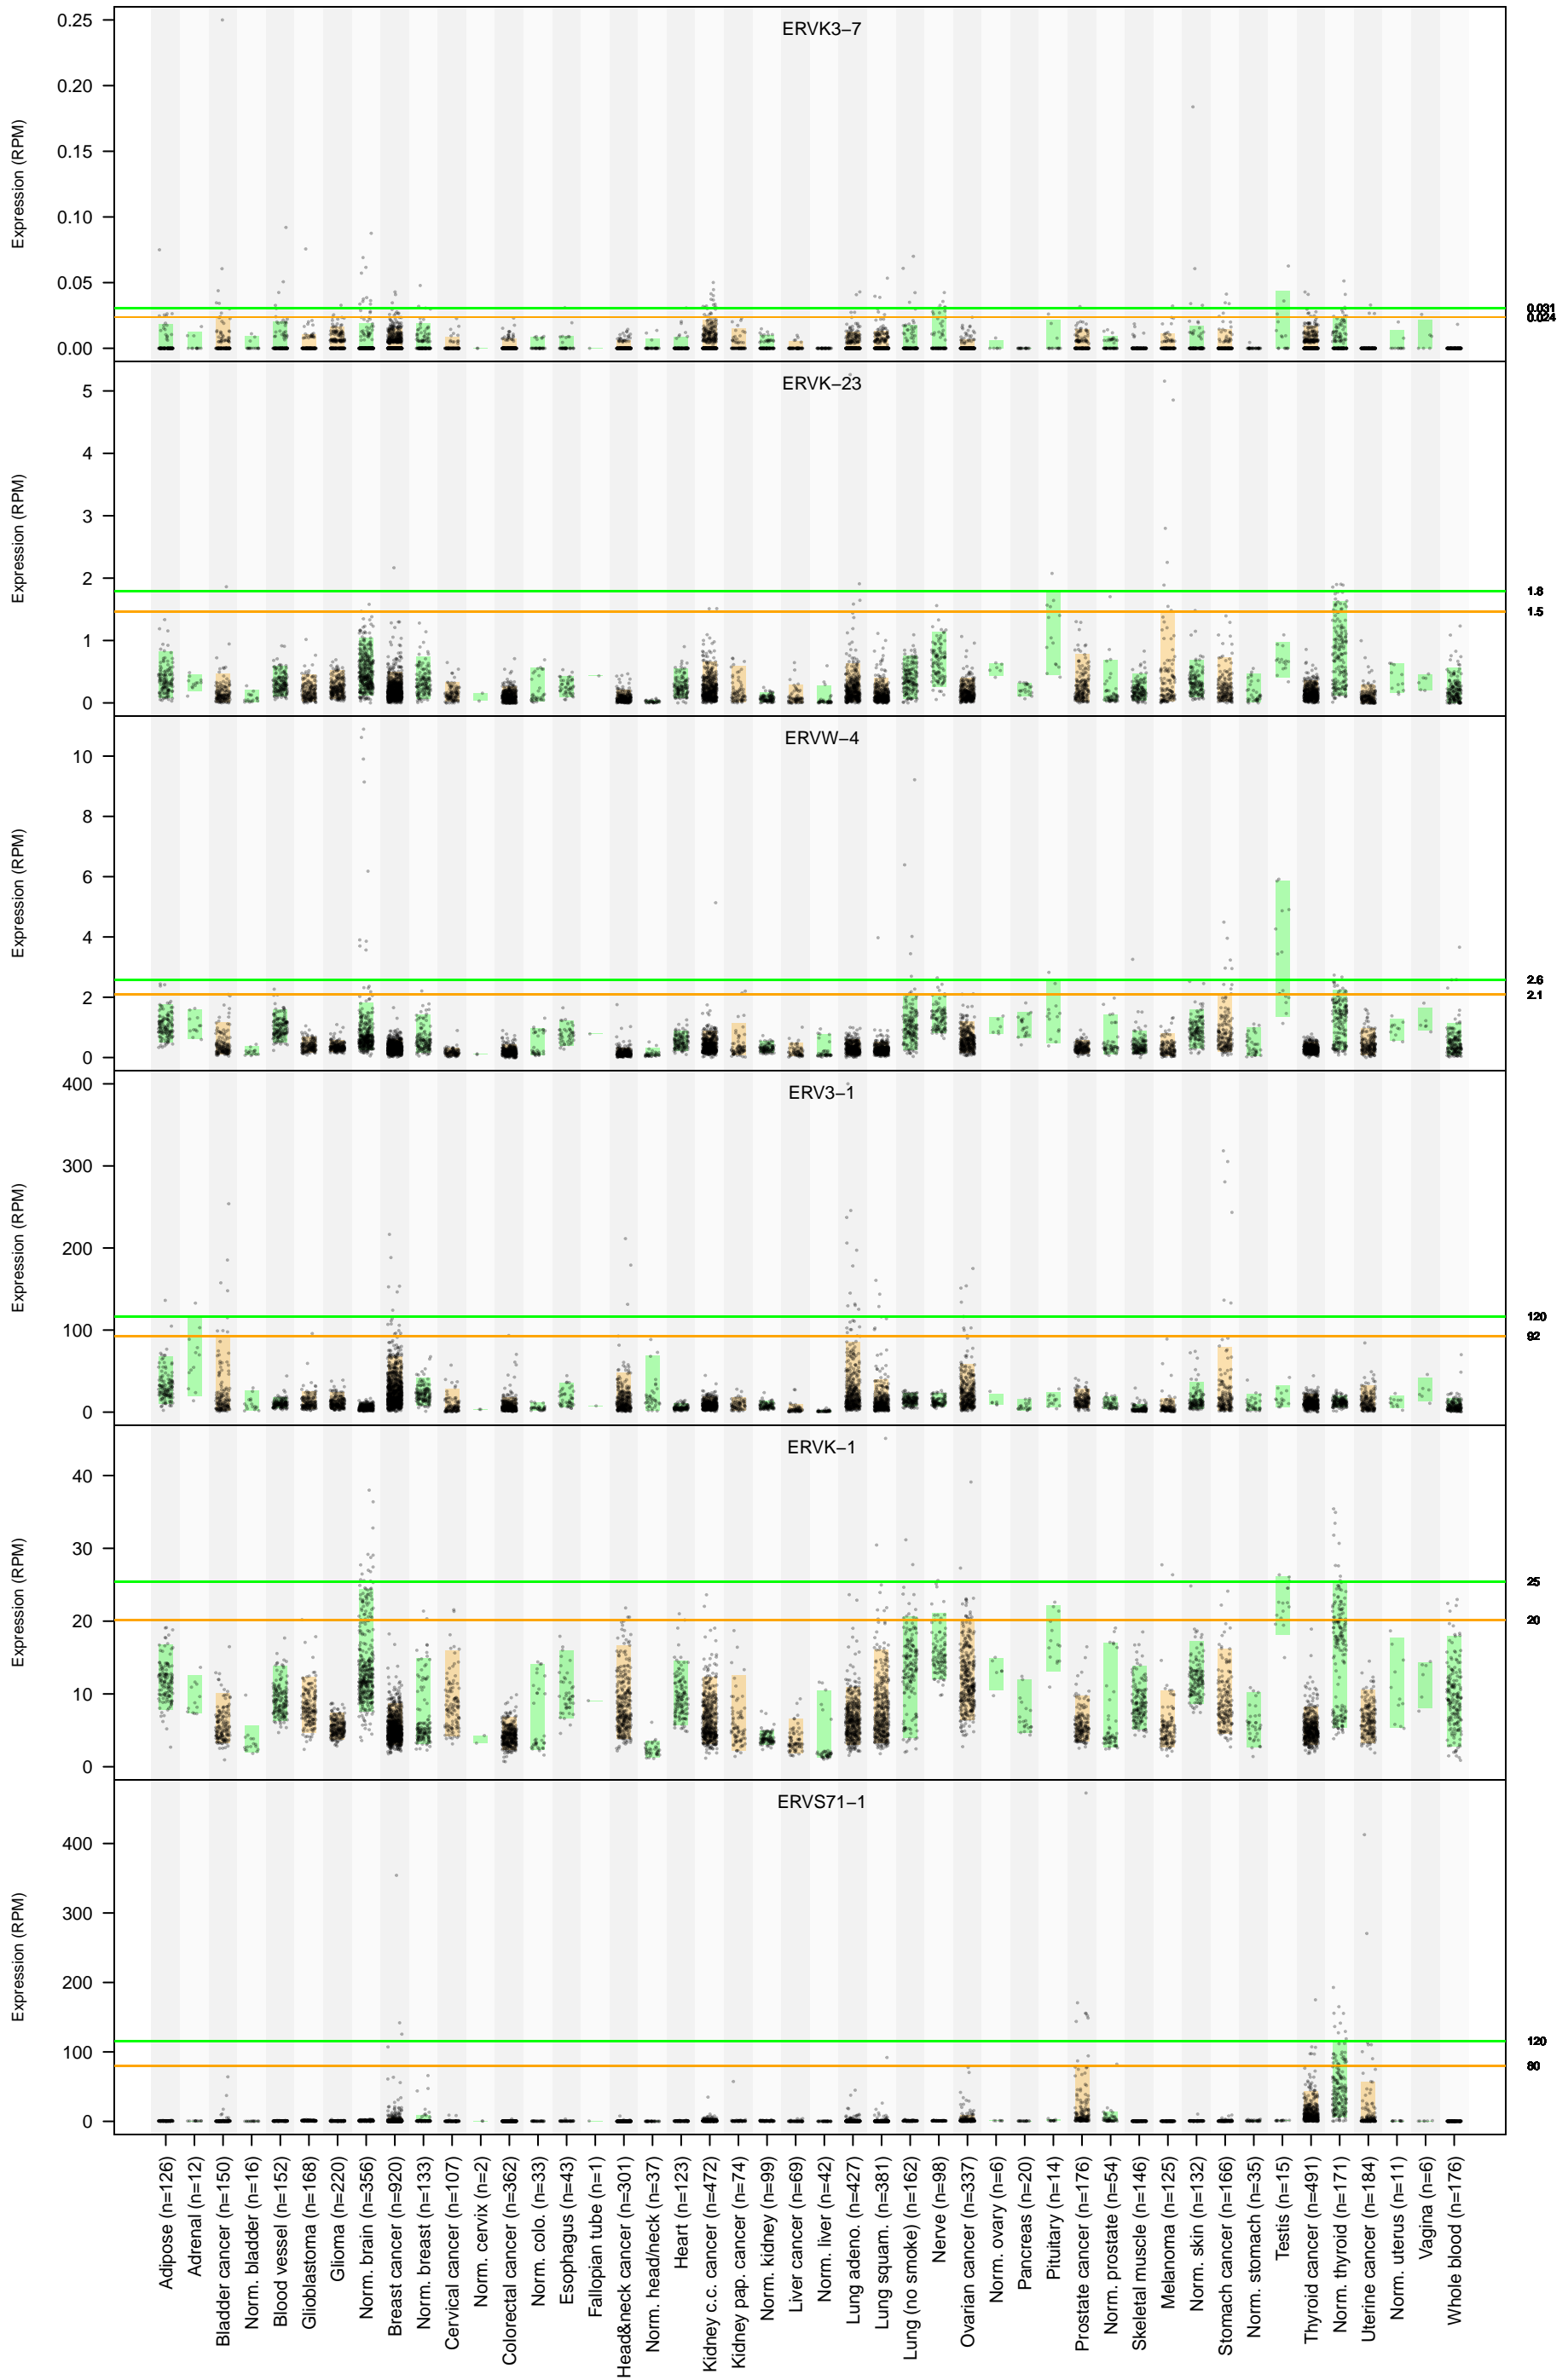

Data 4SE, cont...

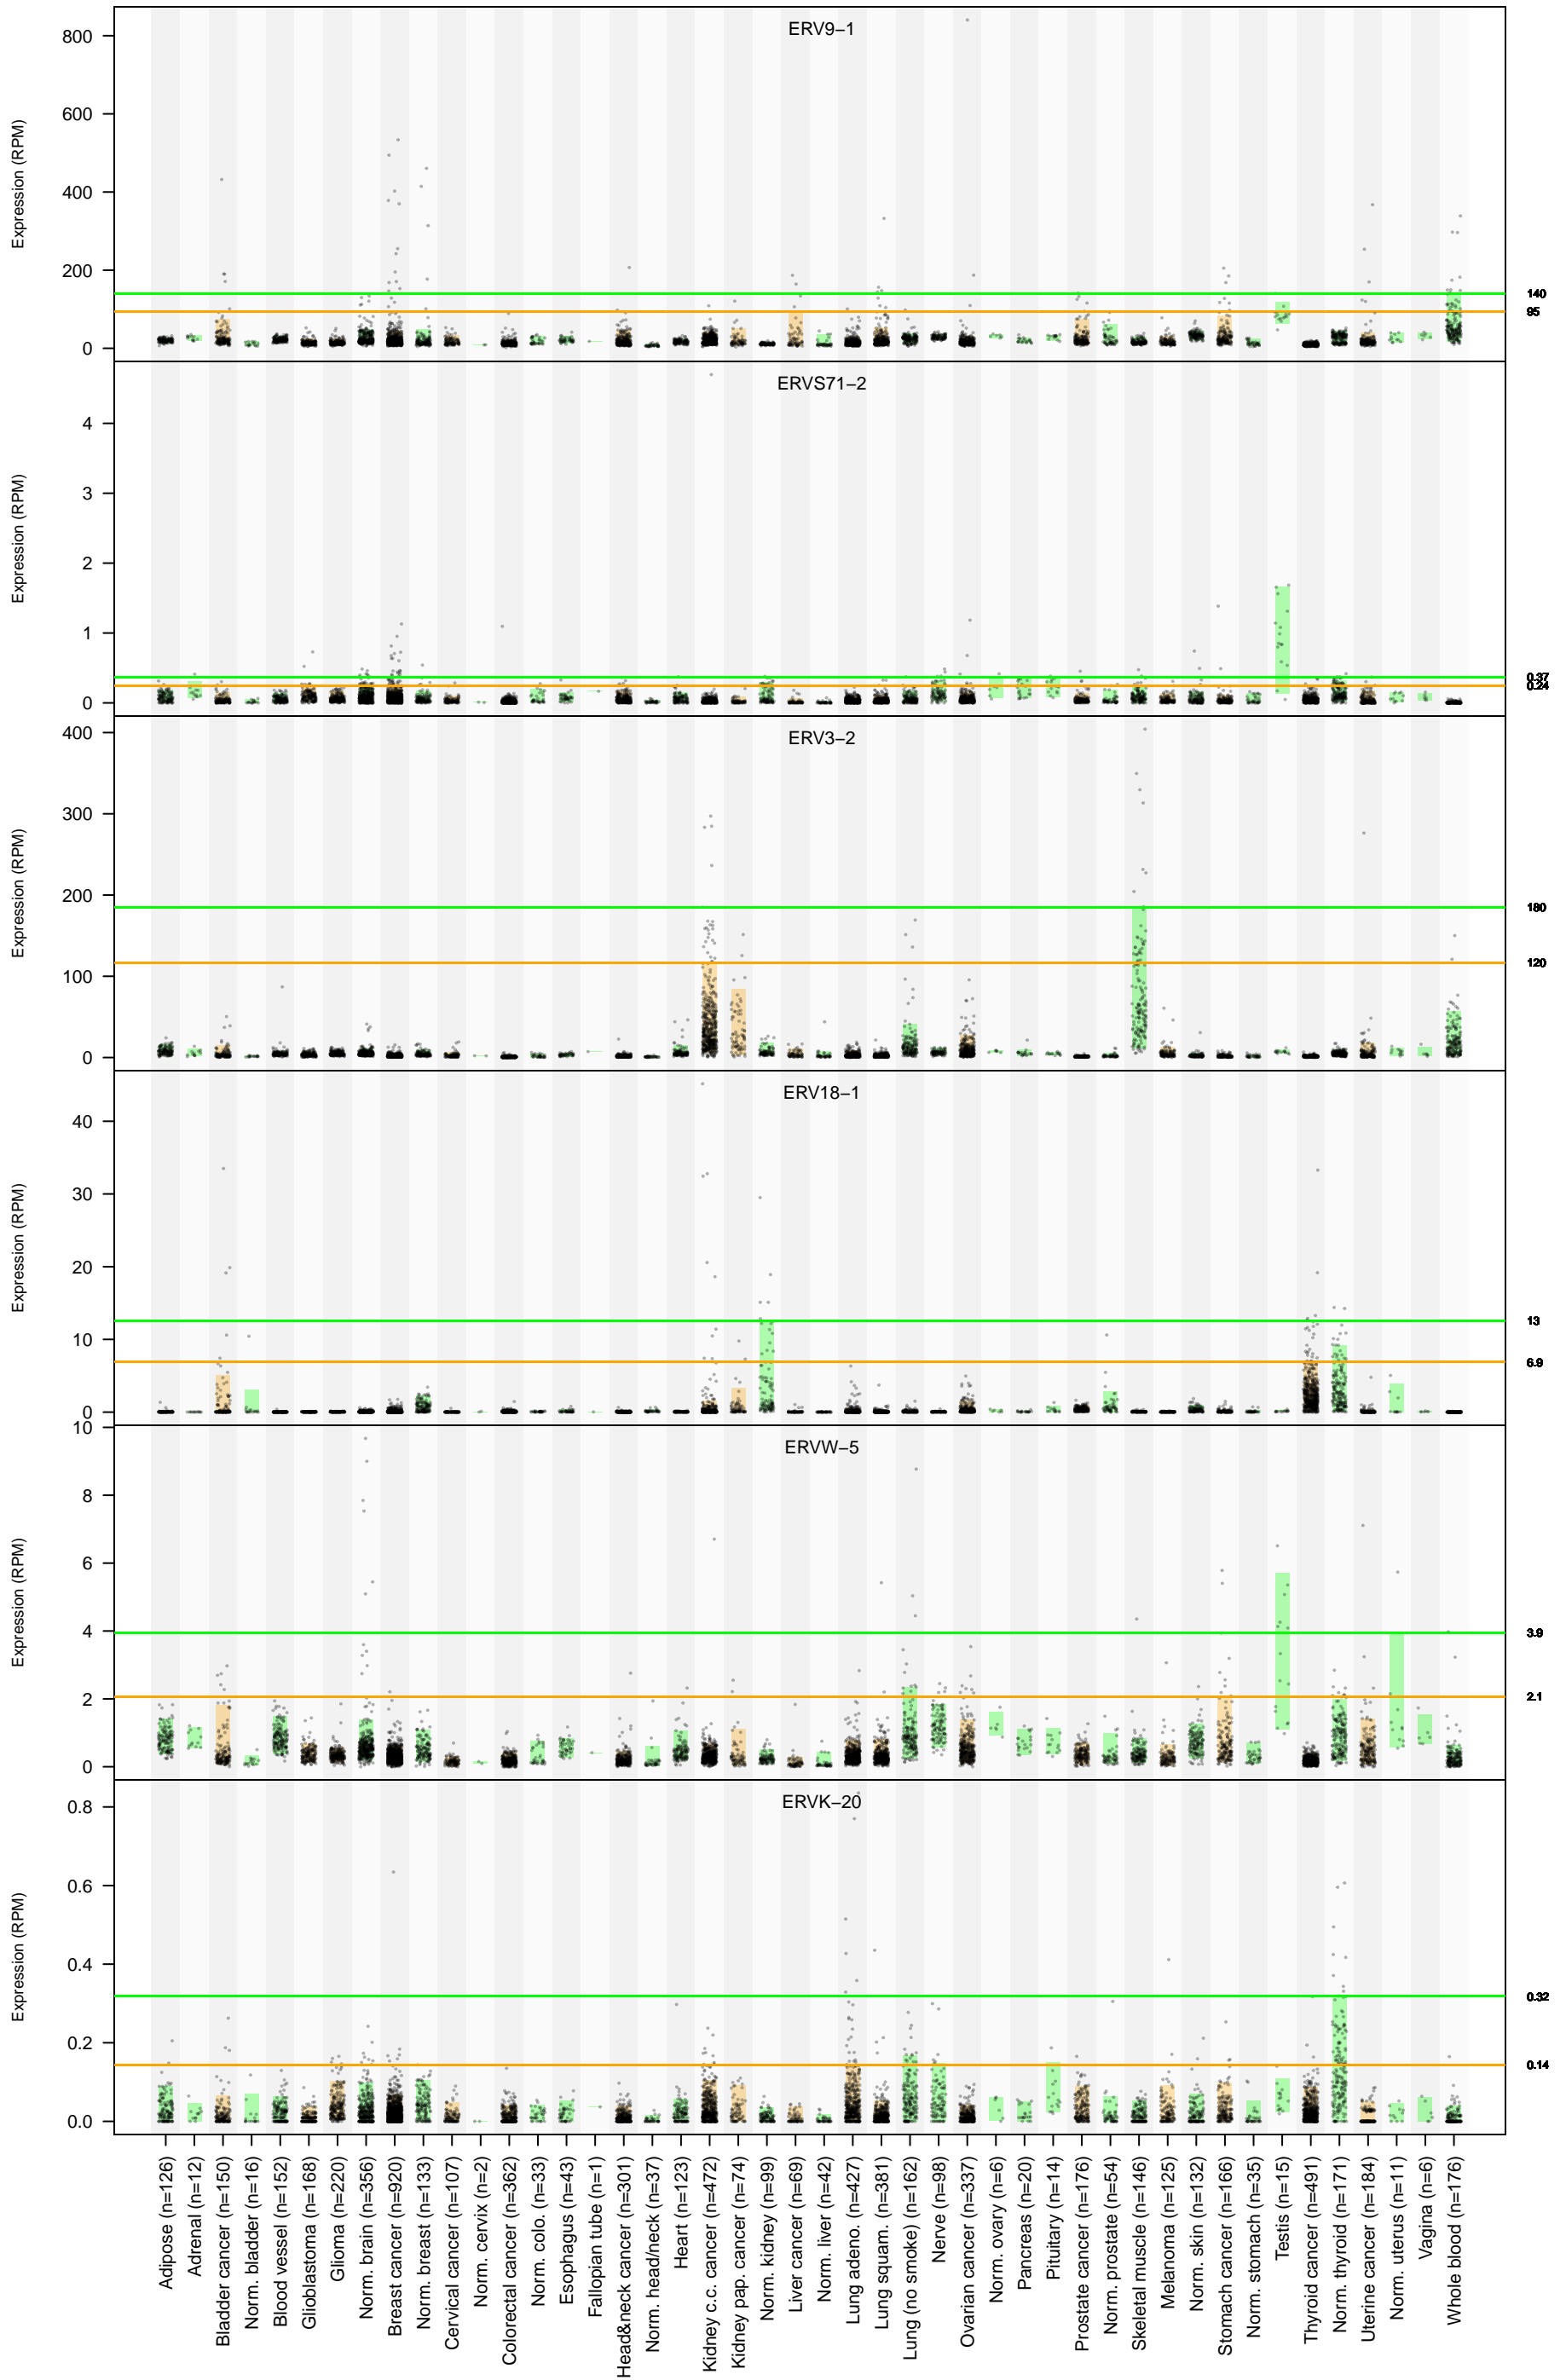

Data 4SE, cont...

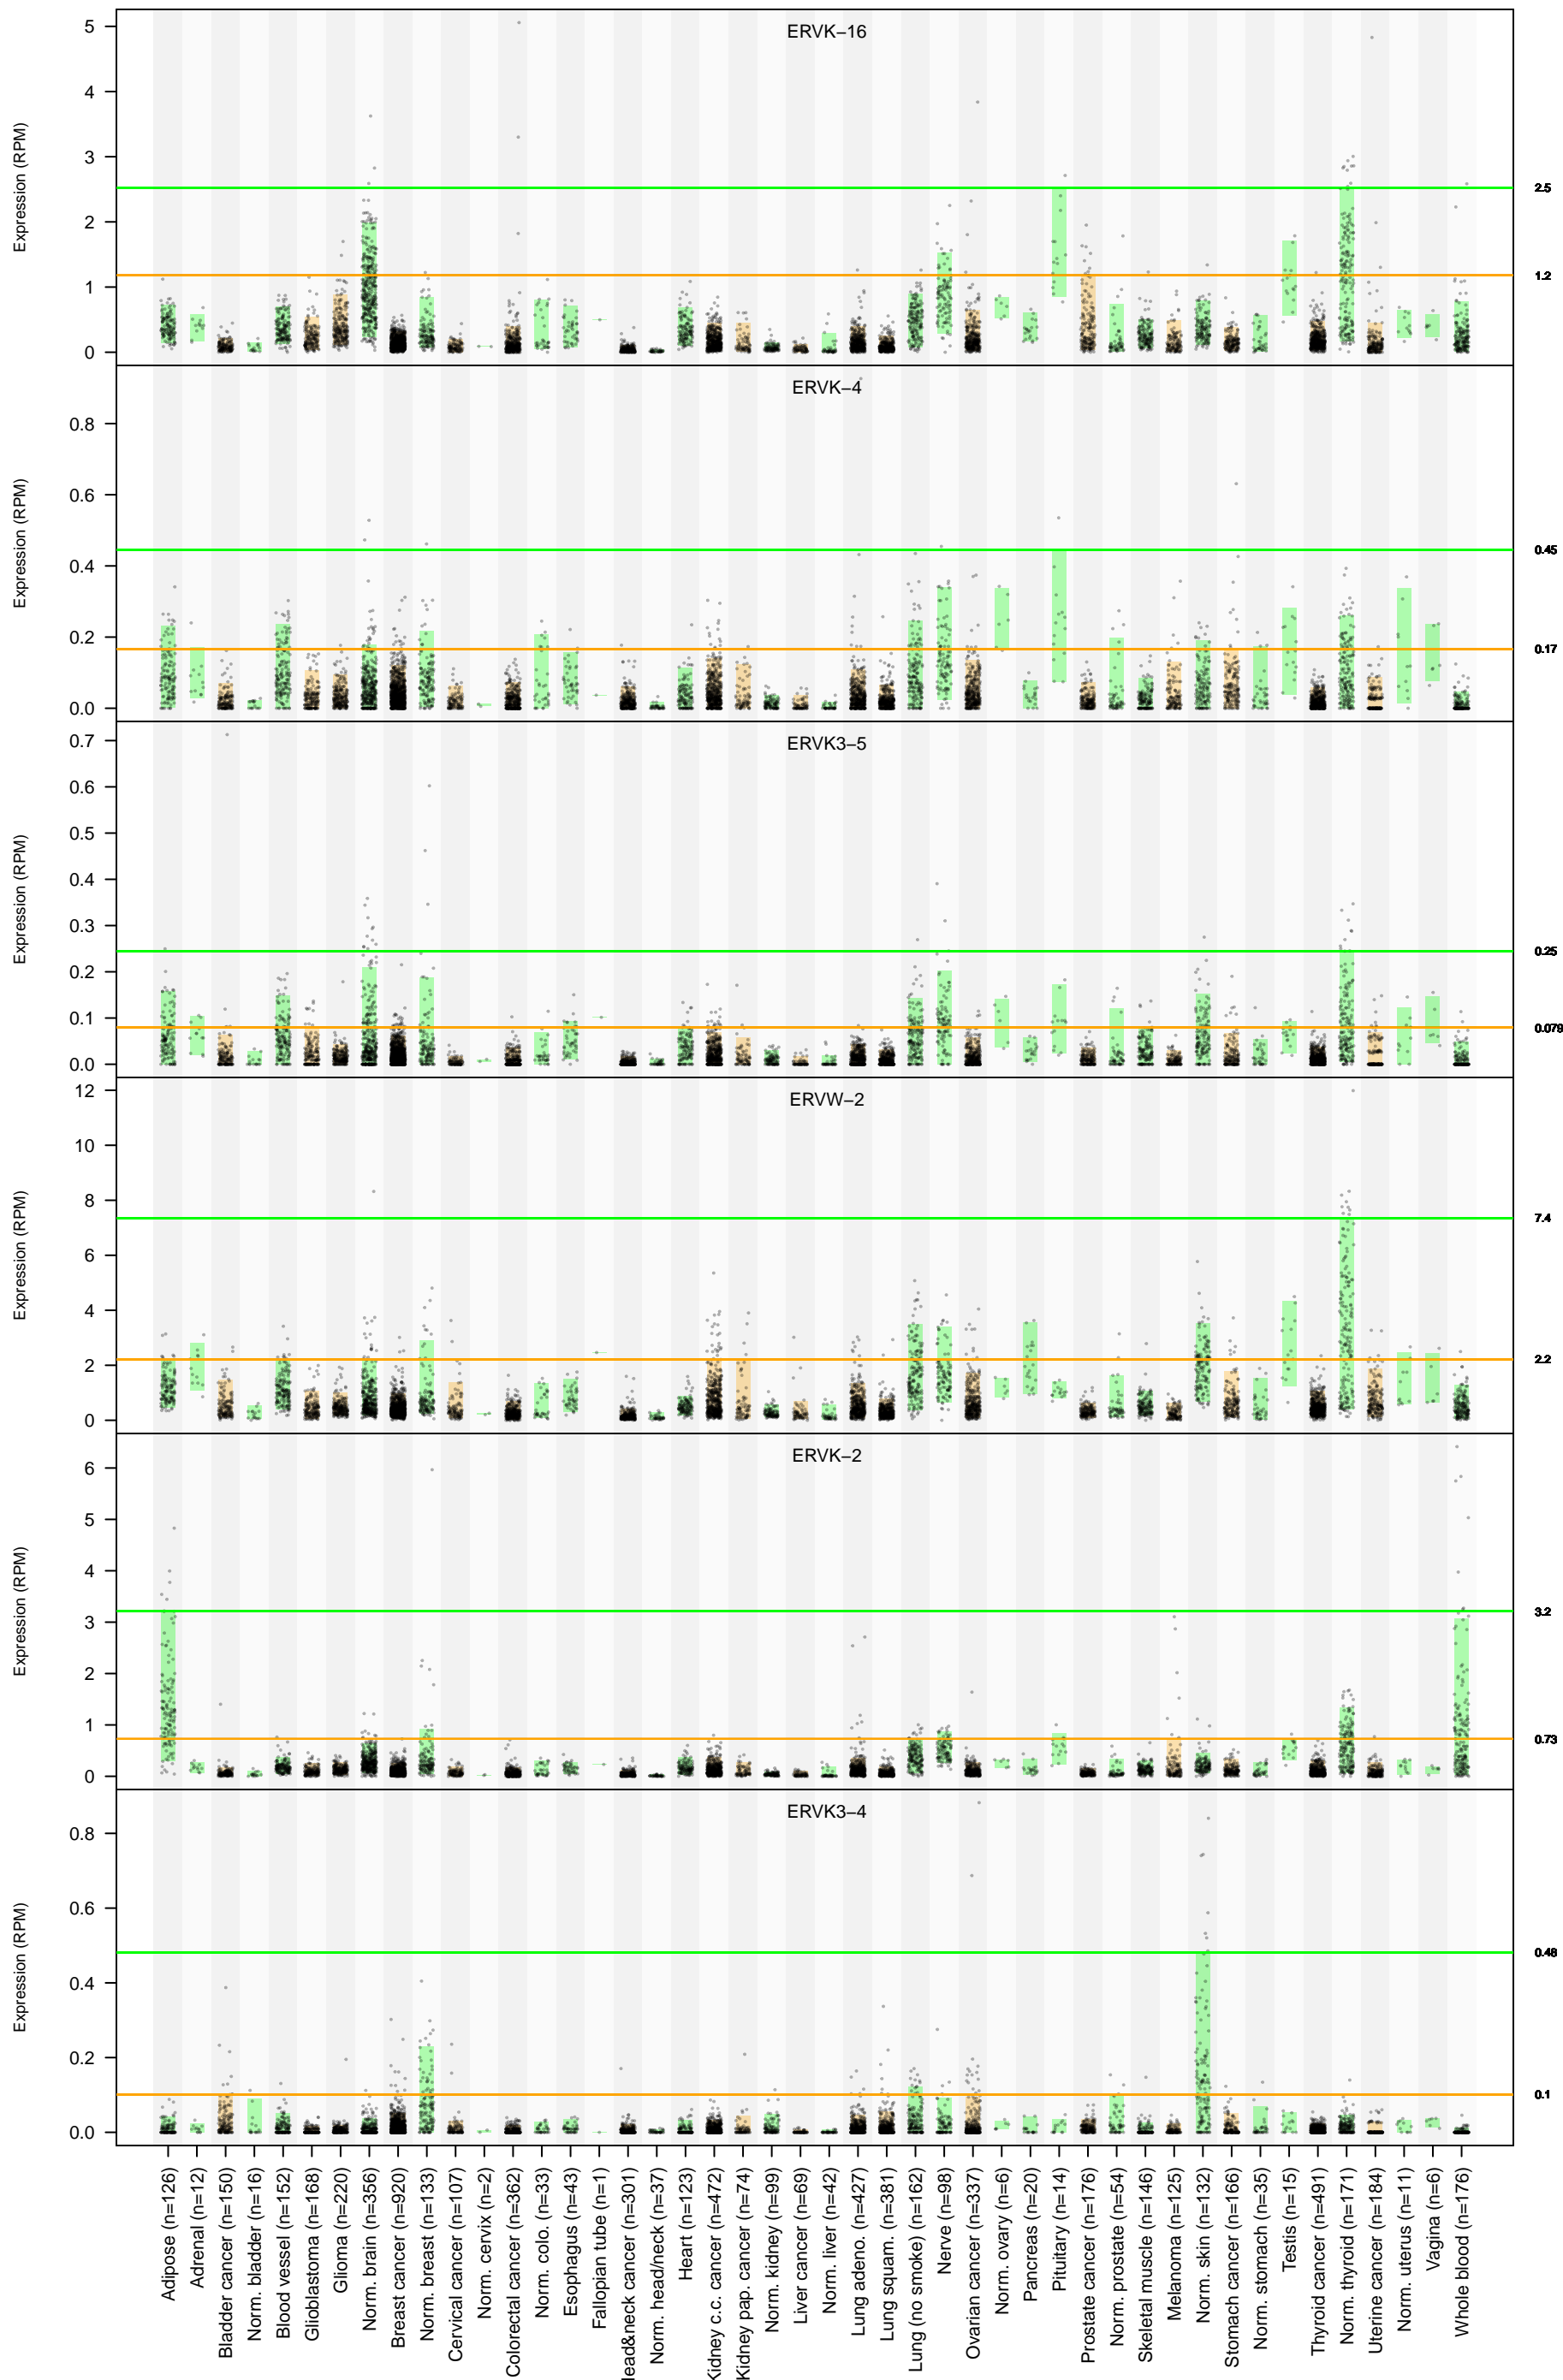



# Data S4F

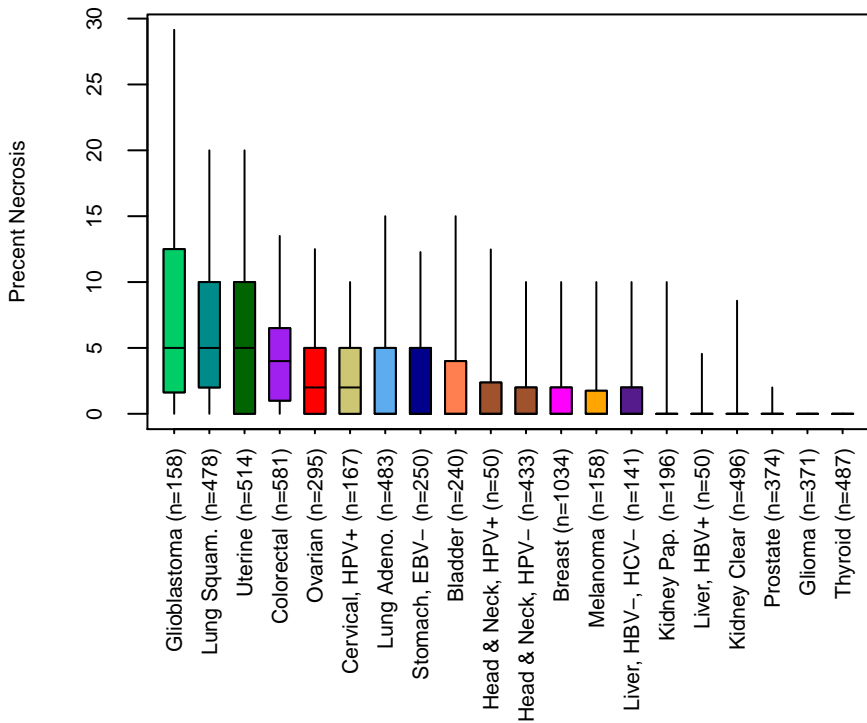

# Data 4SG

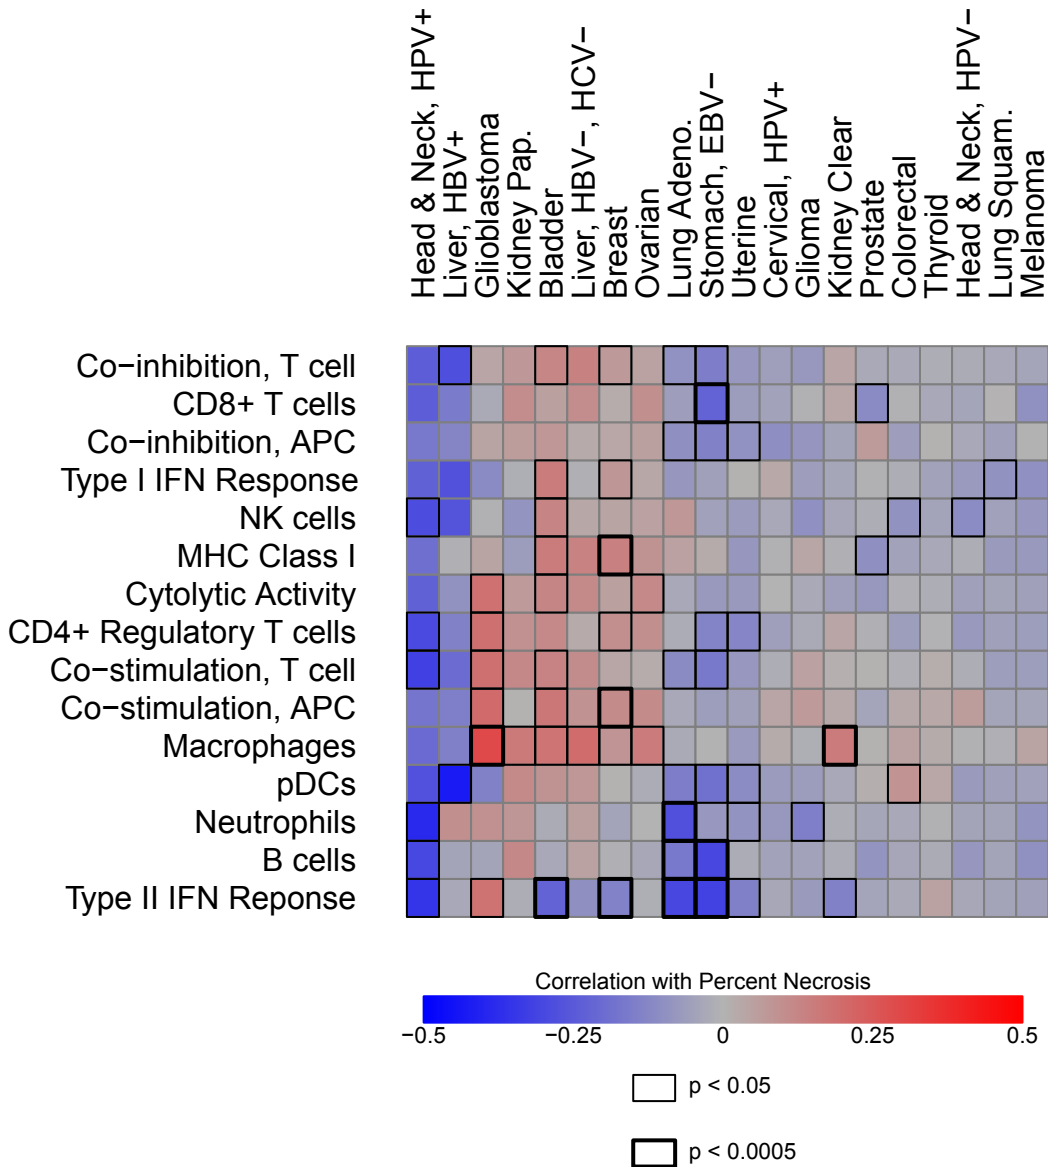

Supplement: NIHMS717941-supplement-DataS4.pdf [file NIHMS717941-supplement-DataS4.pdf]
