# Supplementary material
Source: PubMed Central journal article supplement (PMC4856474)

Data S5A

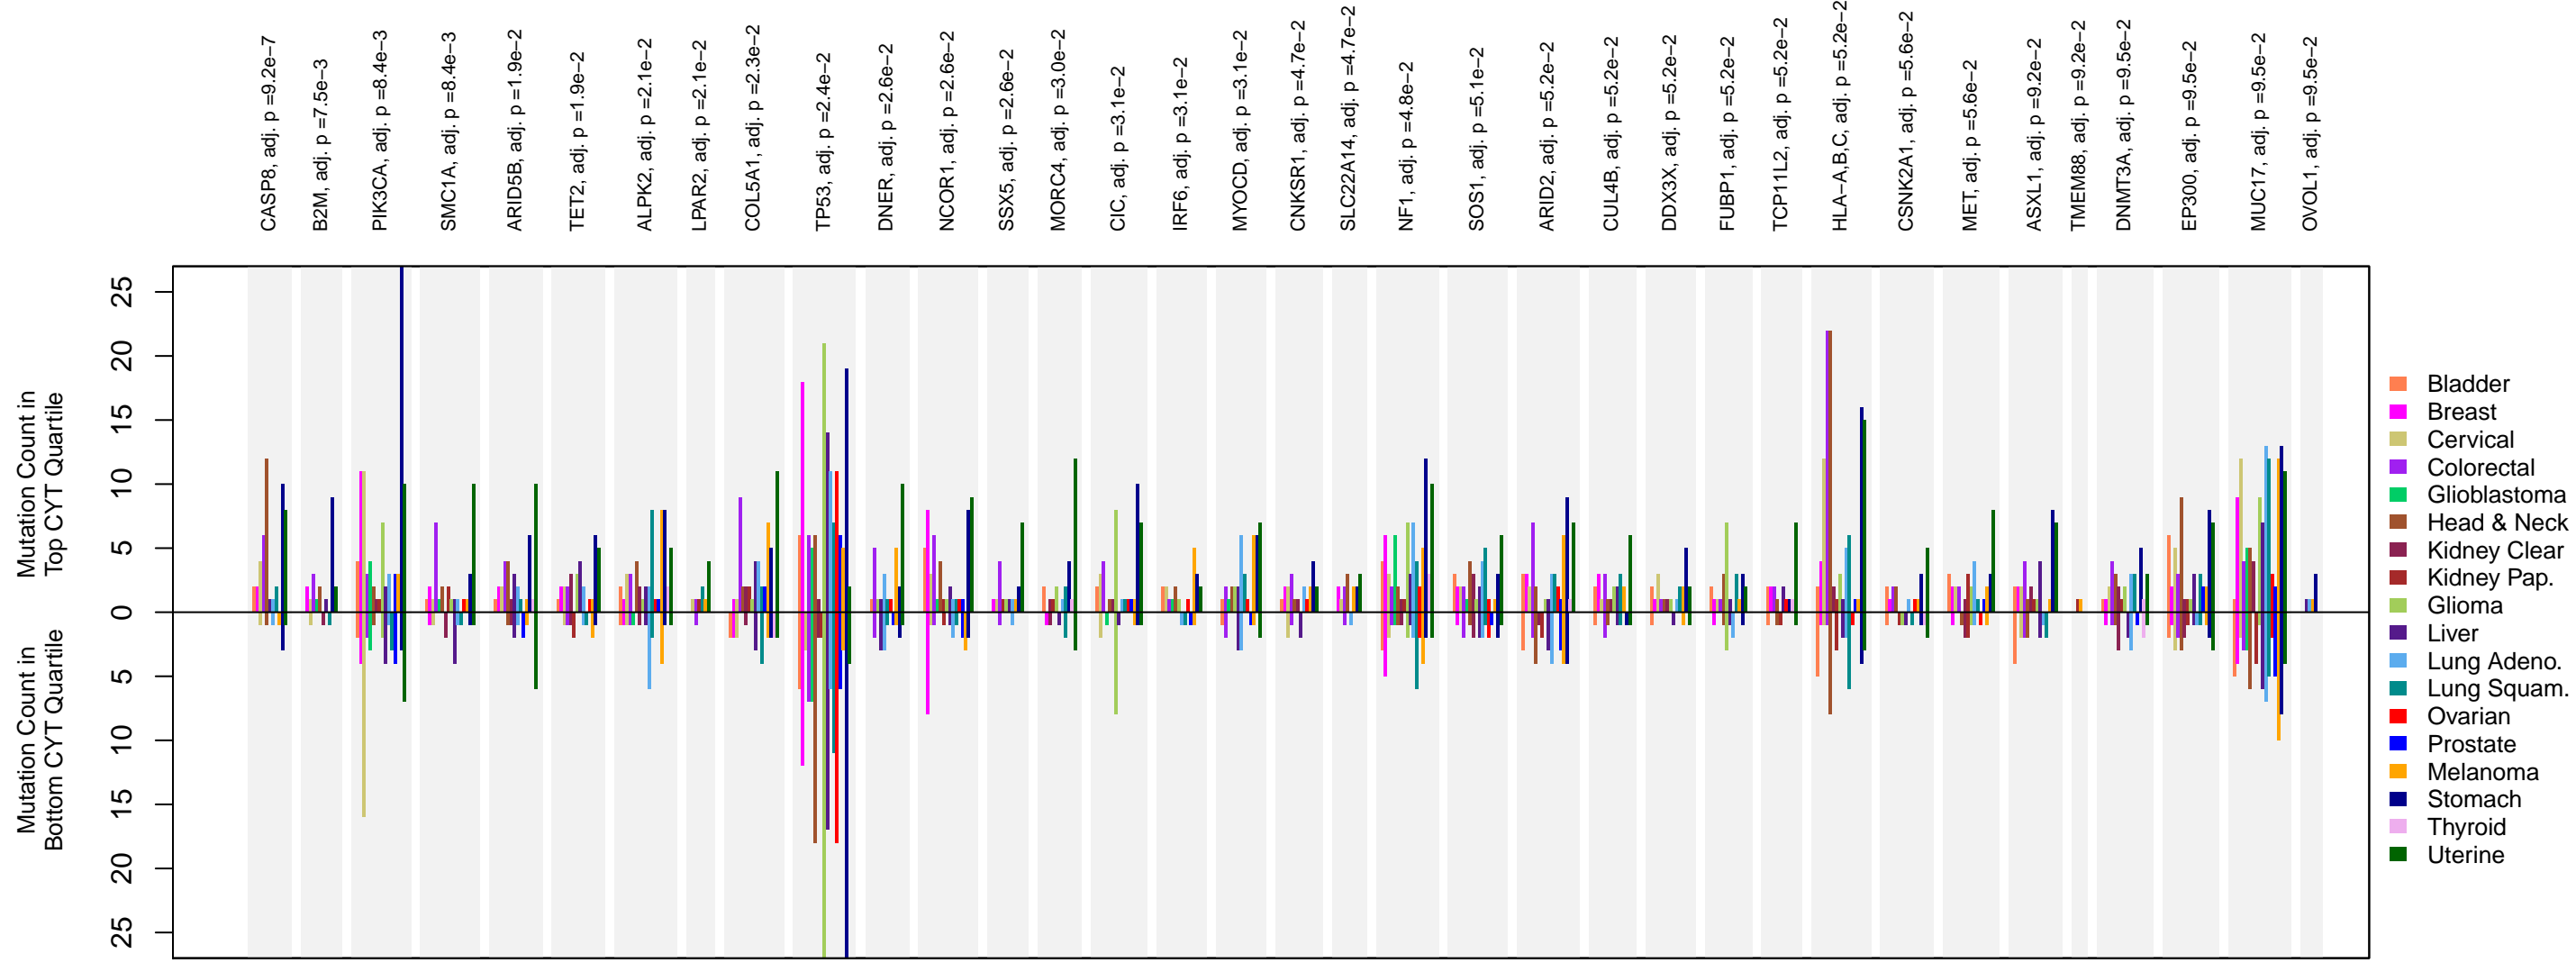

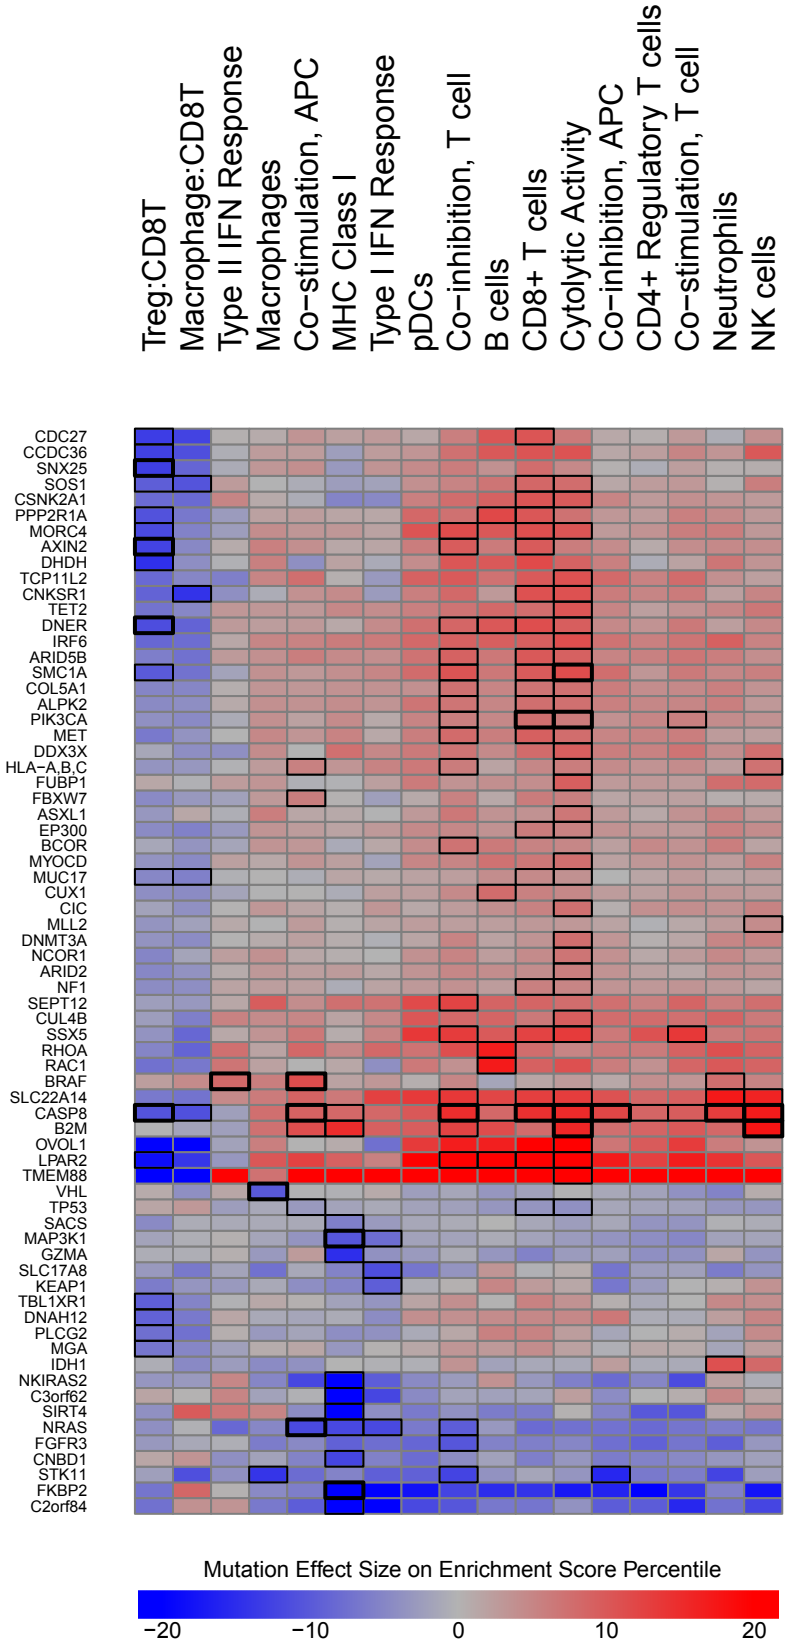

Mutation Effect Size on Enrichment Score Percentile

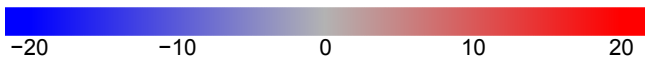

□ adj. p < 0.1

◻ adj. p < 0.01

# Data S5C

● Synon.    
 ● Nonsyn. In-frame Indel    
 ● Frameshift Nonsense Splice

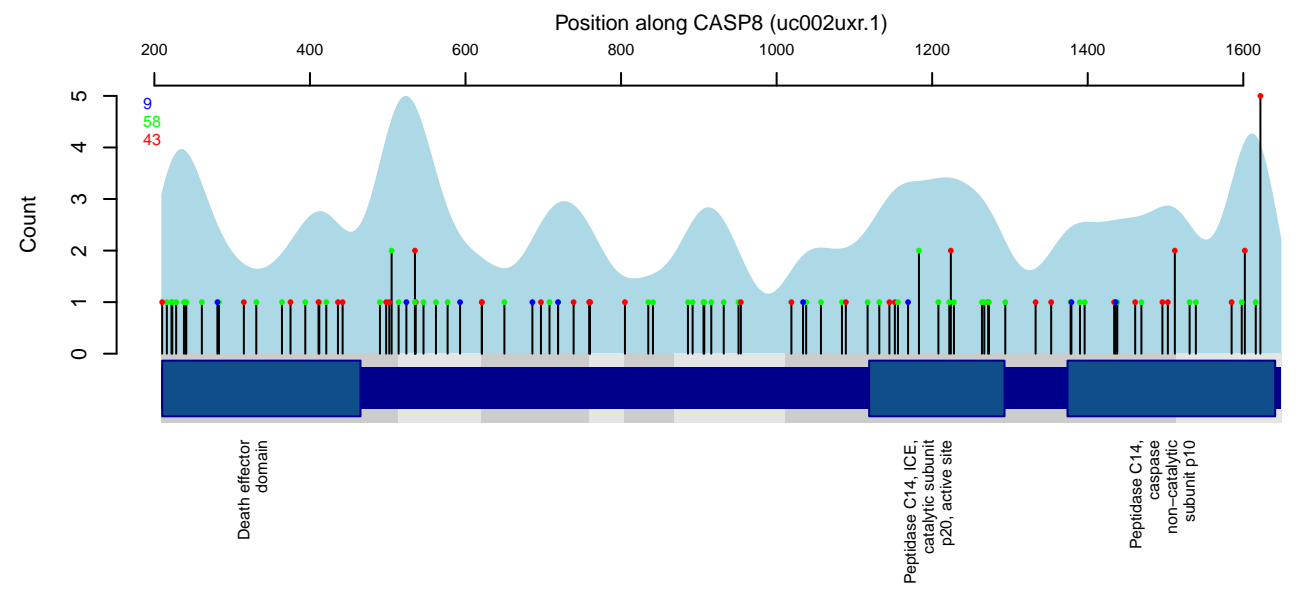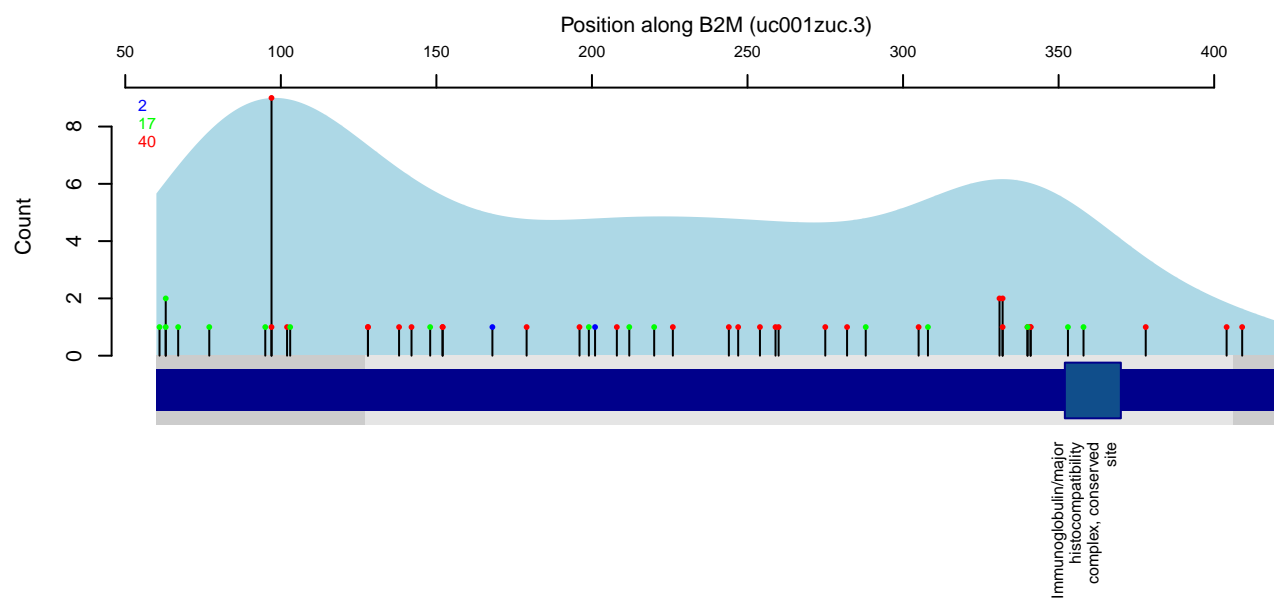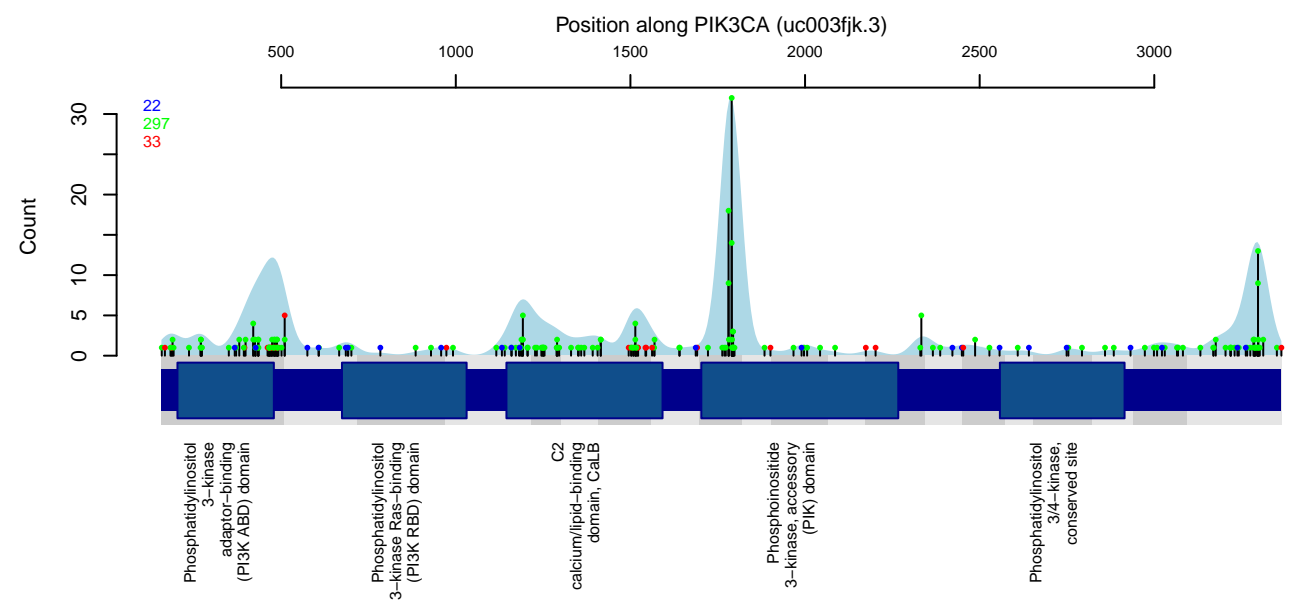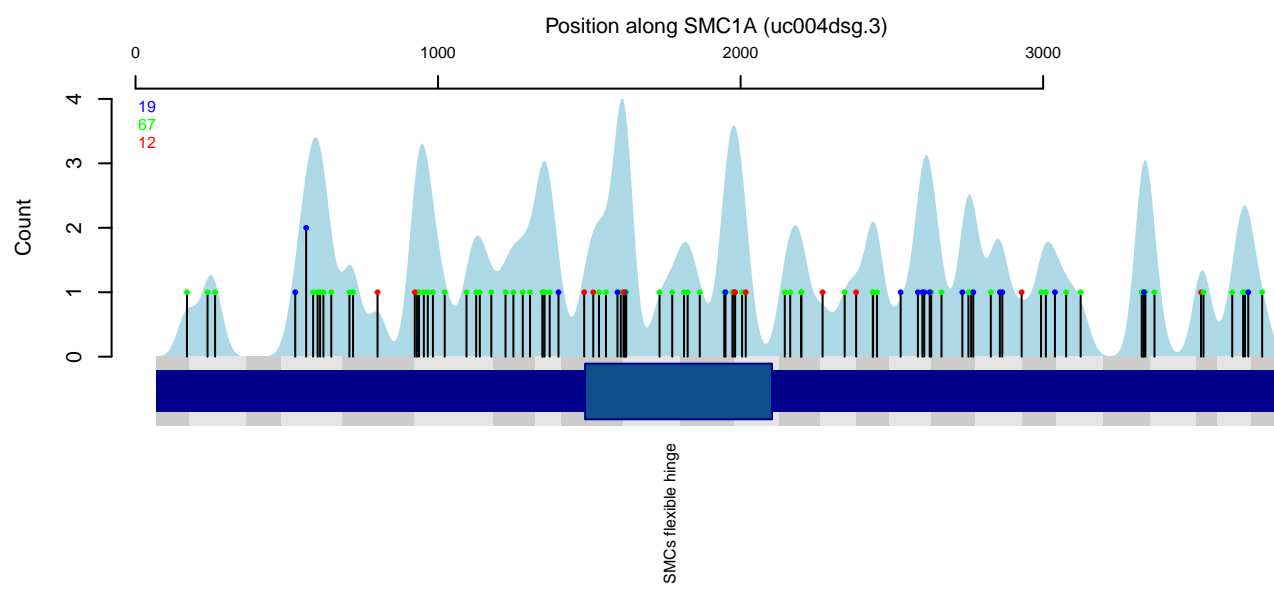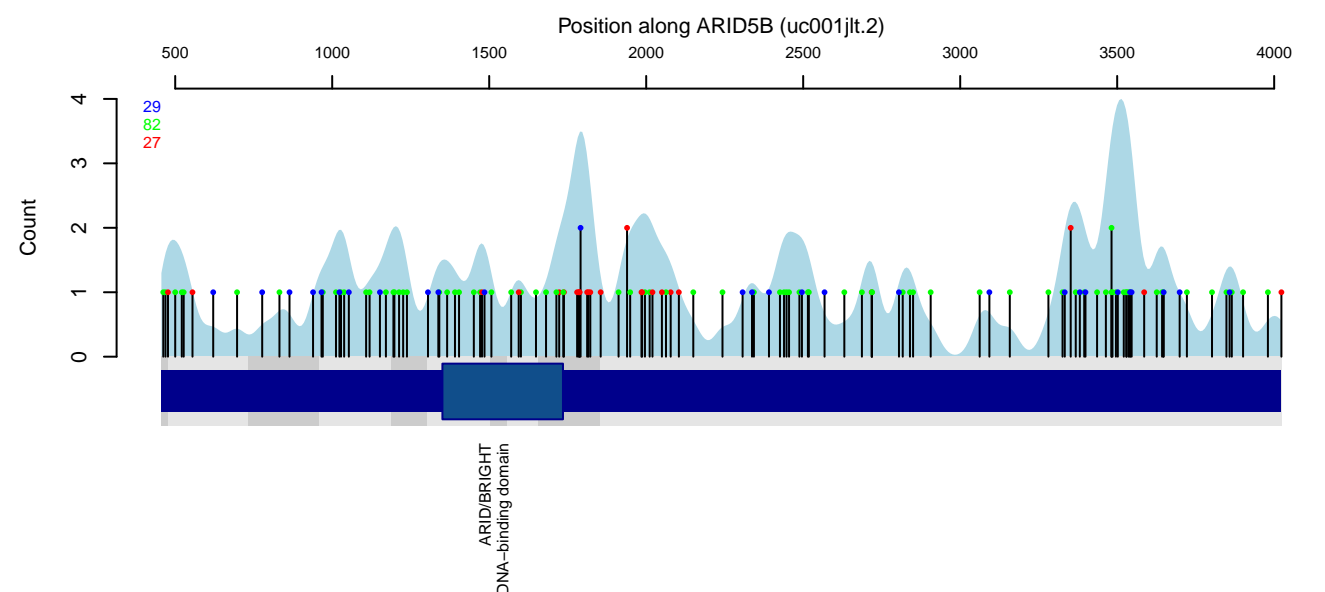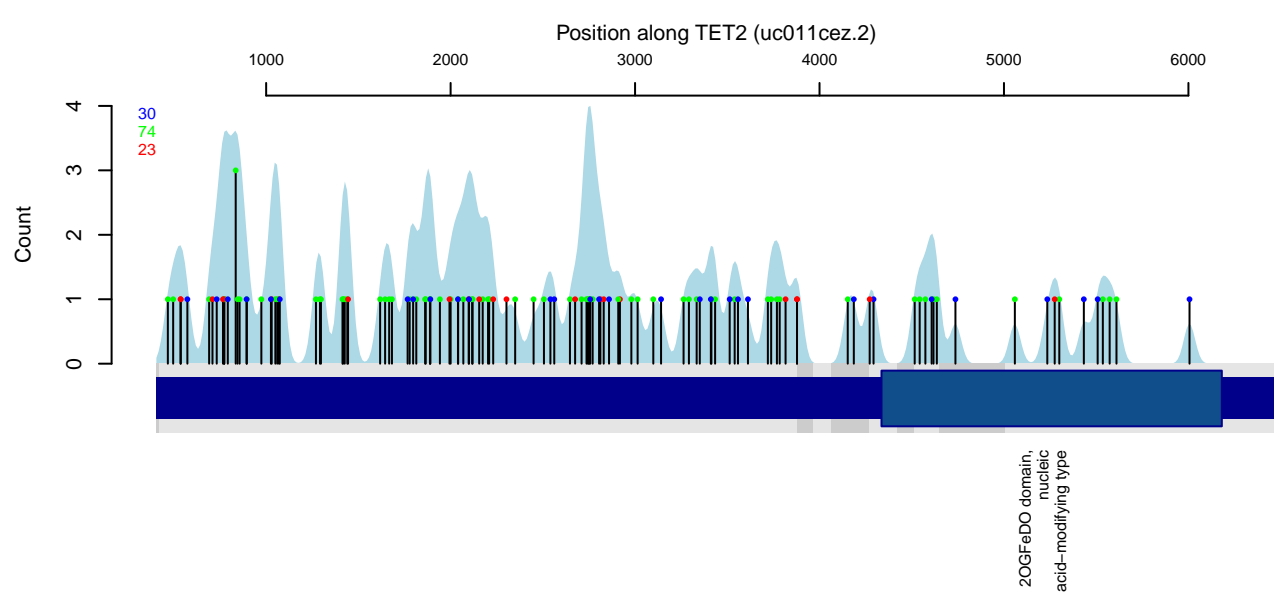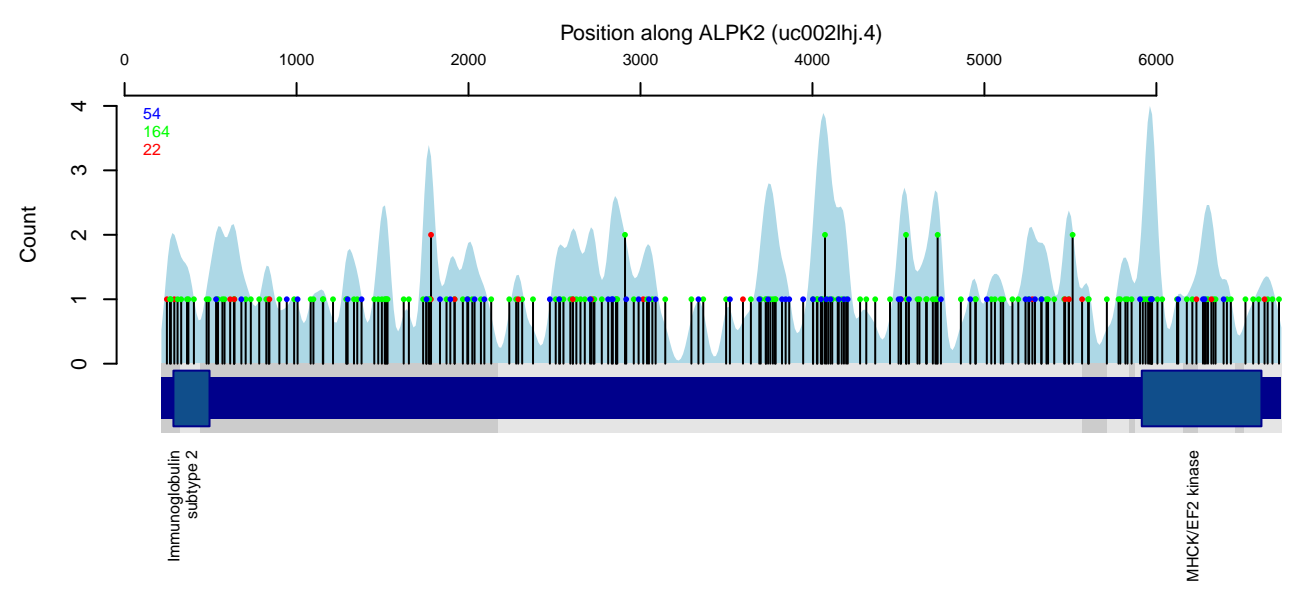

# Data S5C, cont...

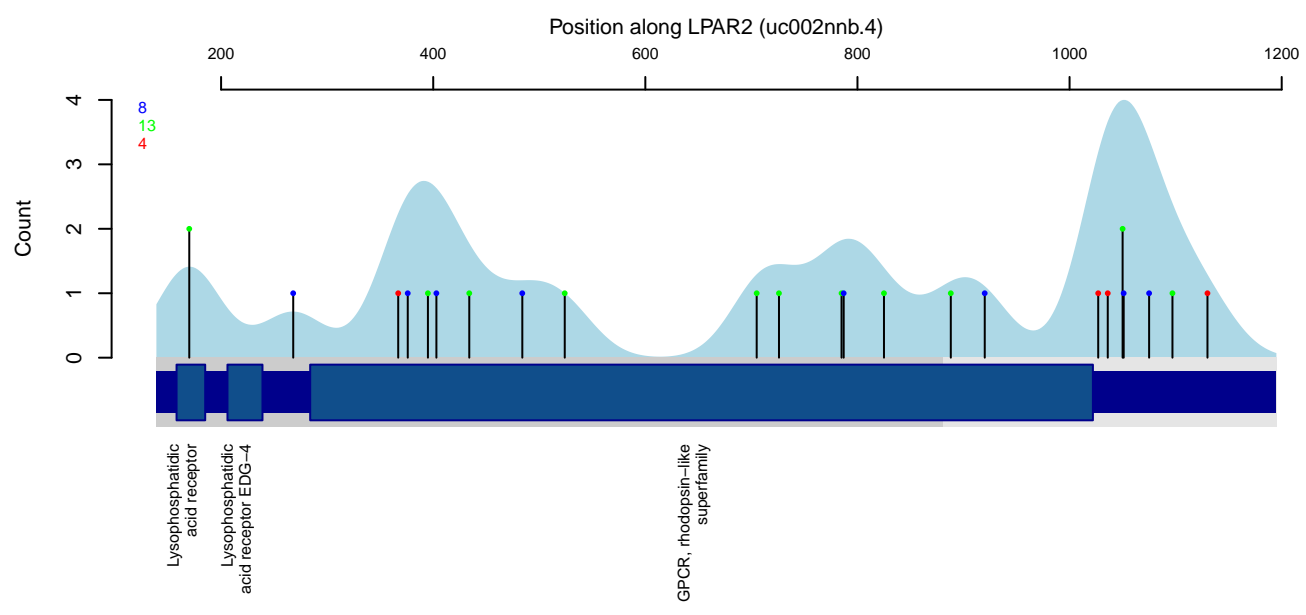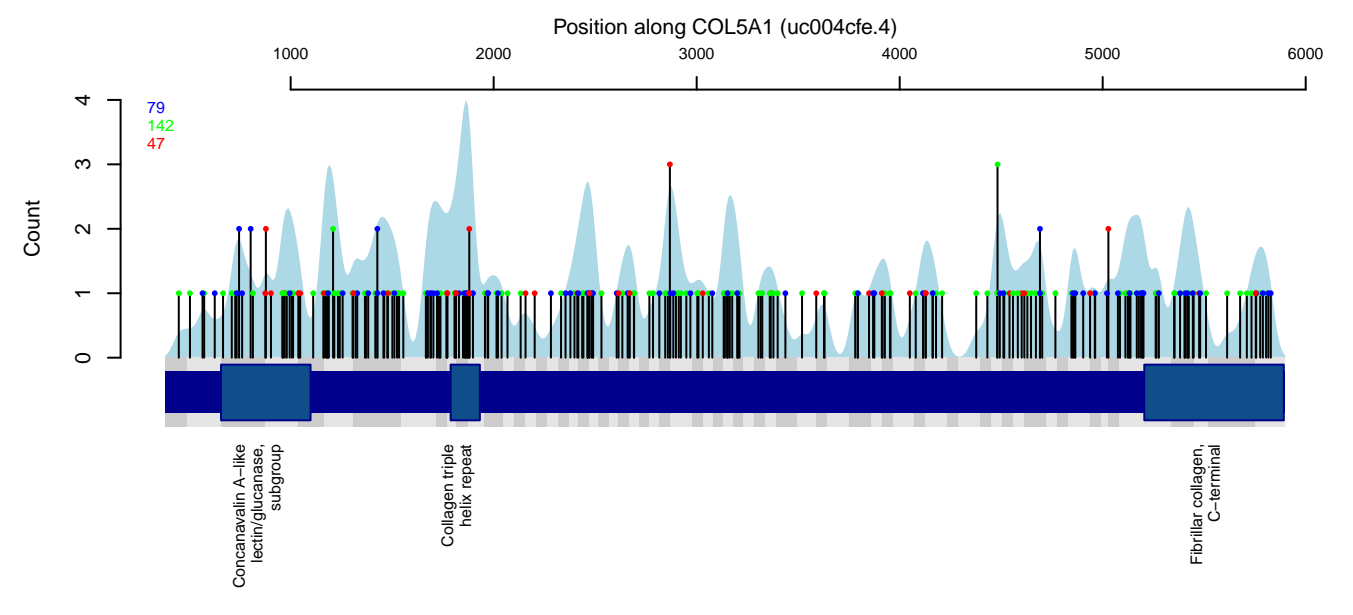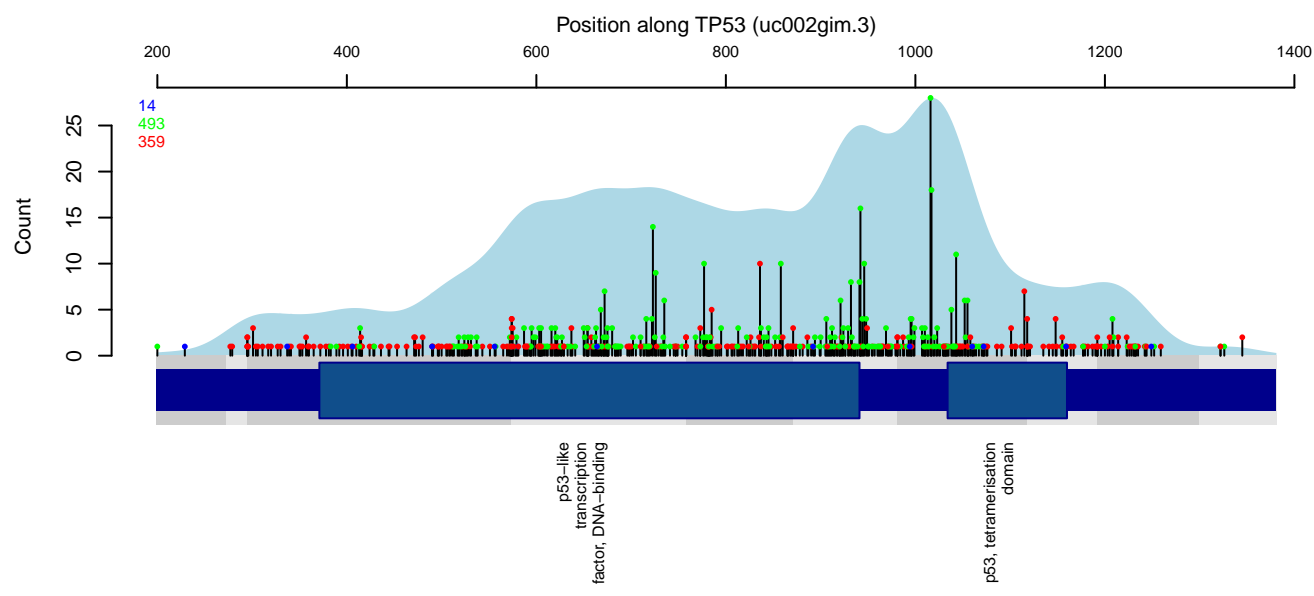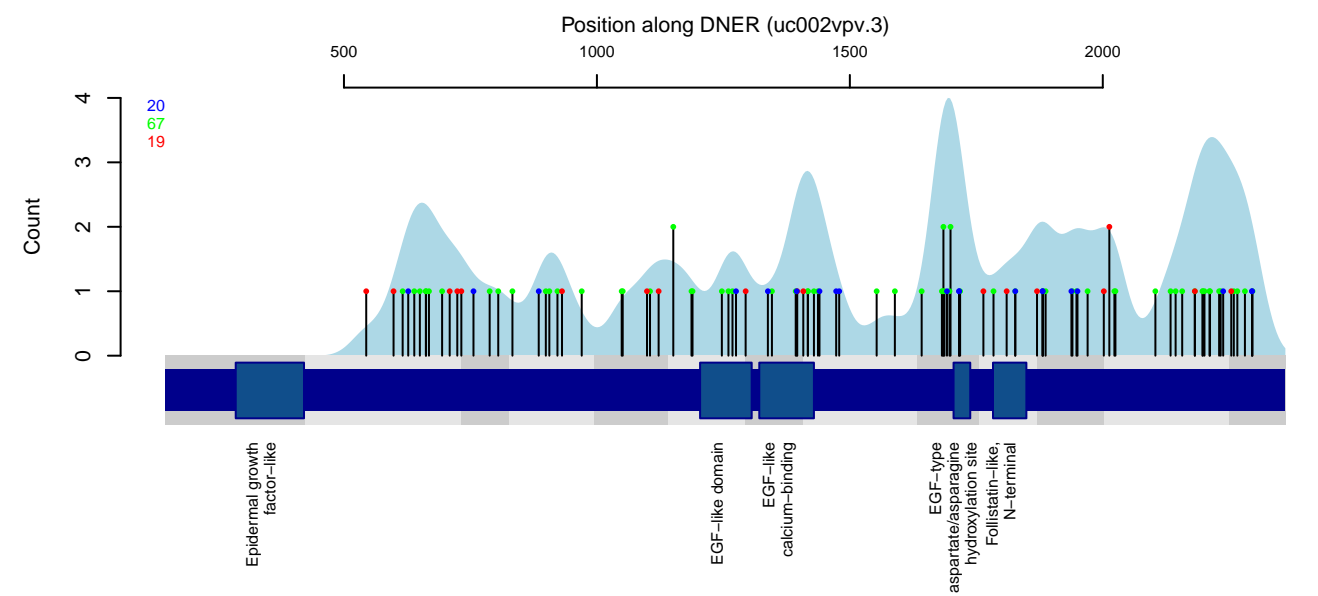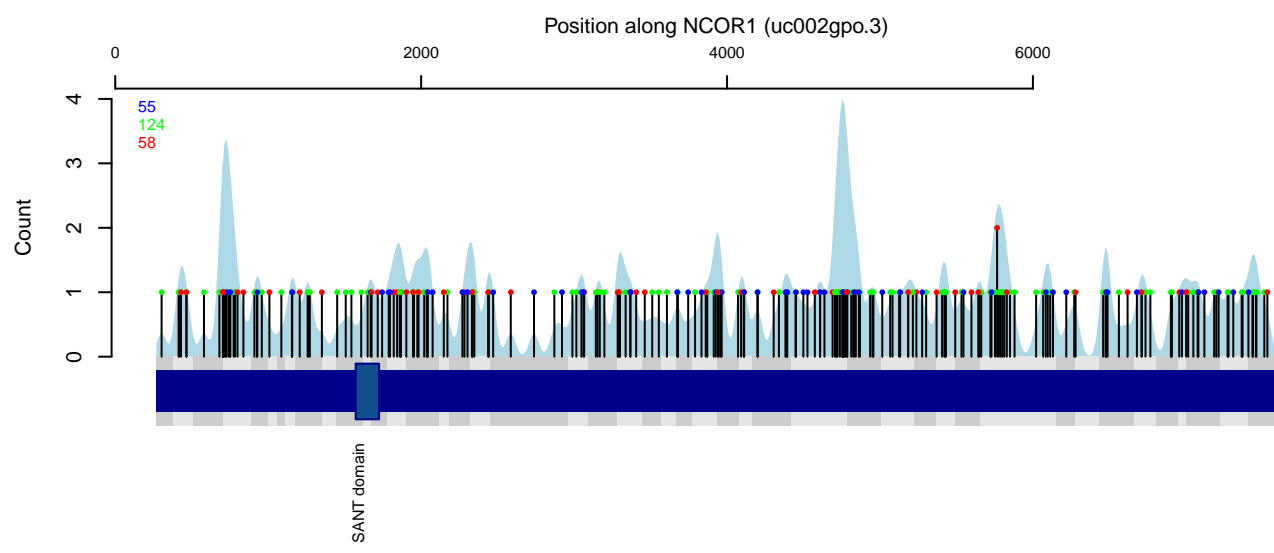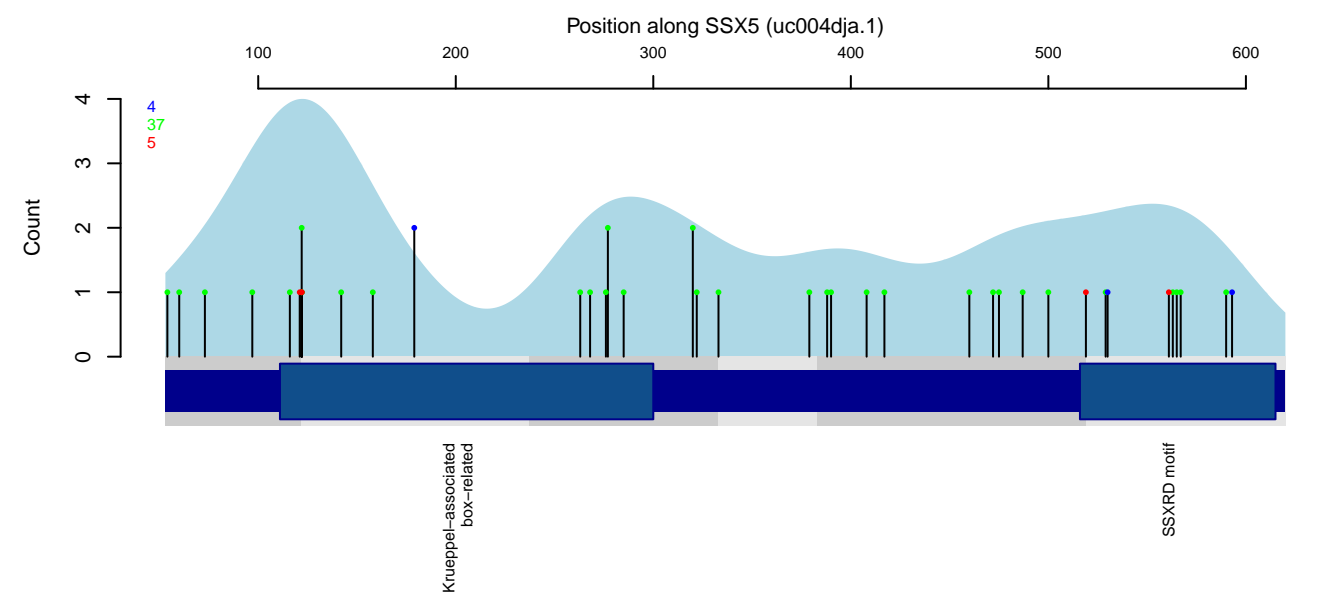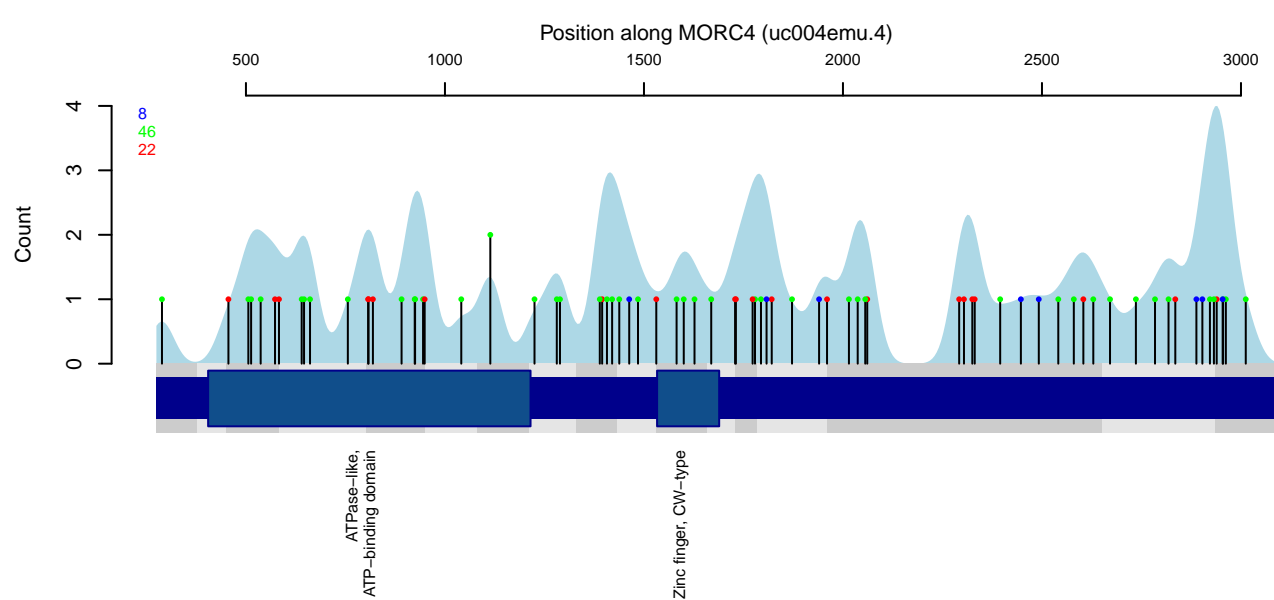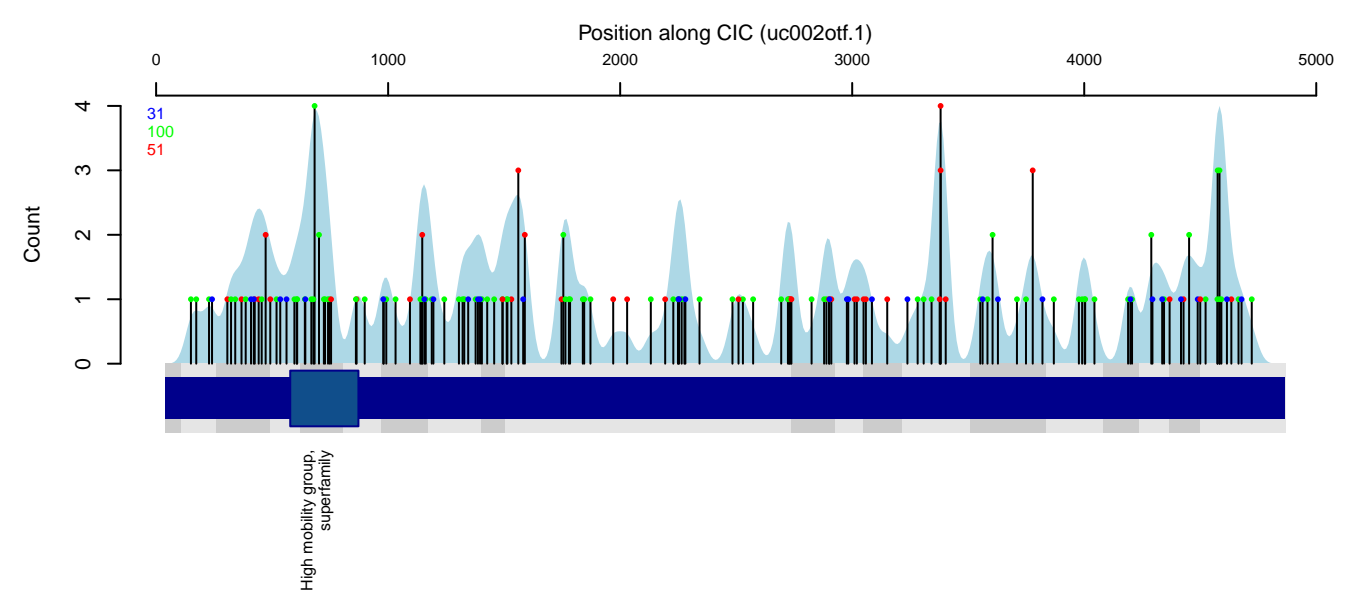

Data S5C, cont...

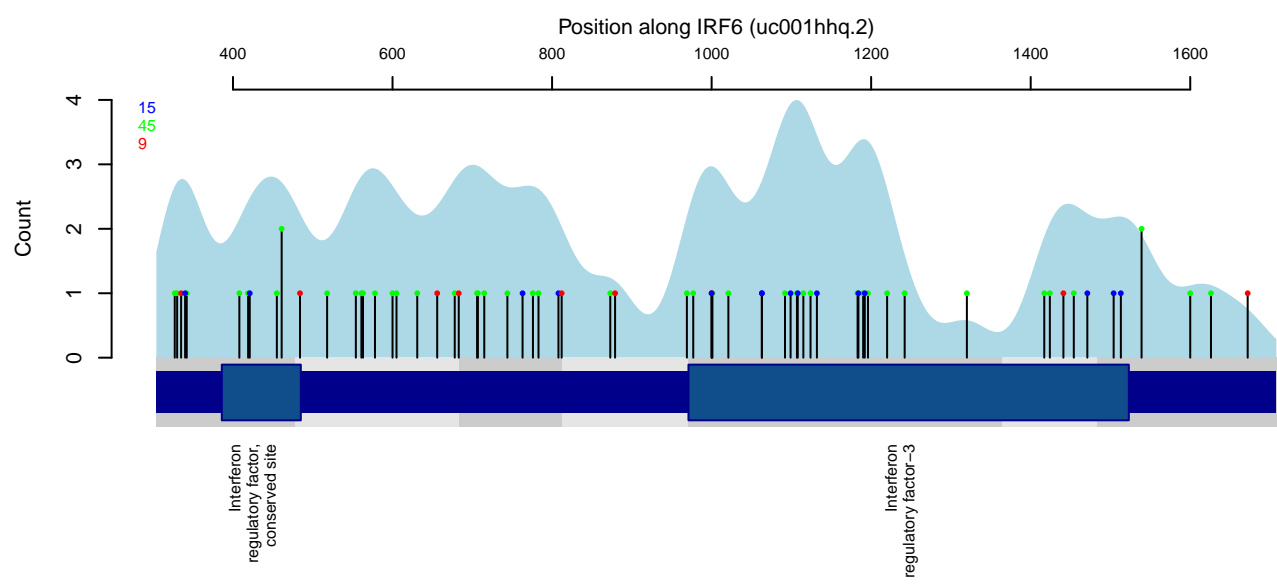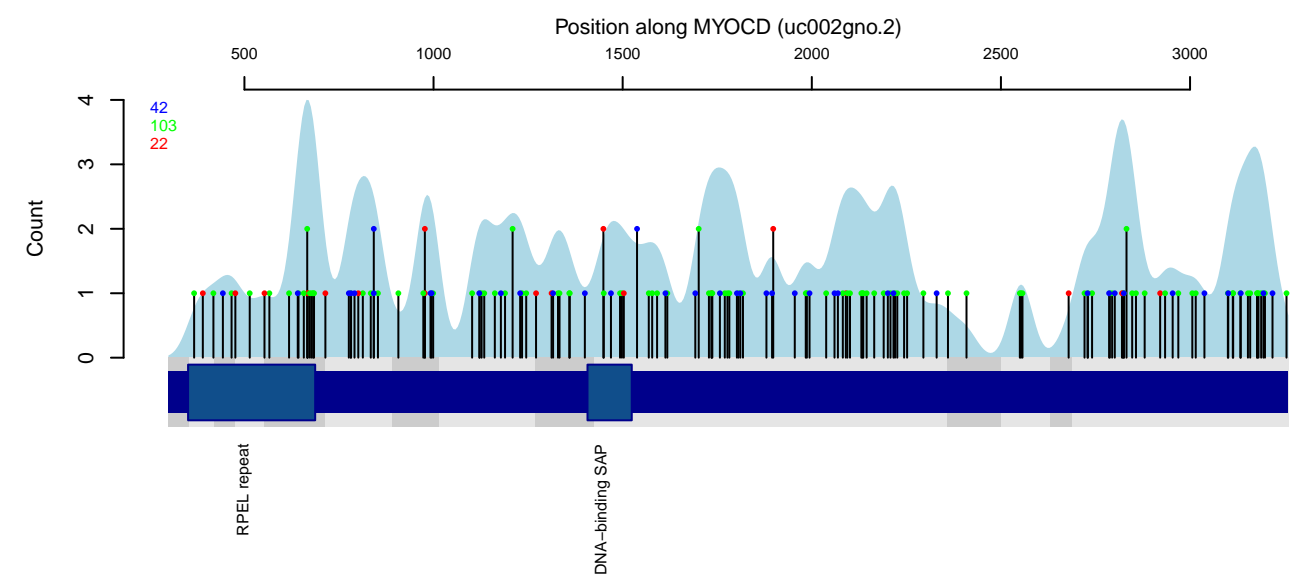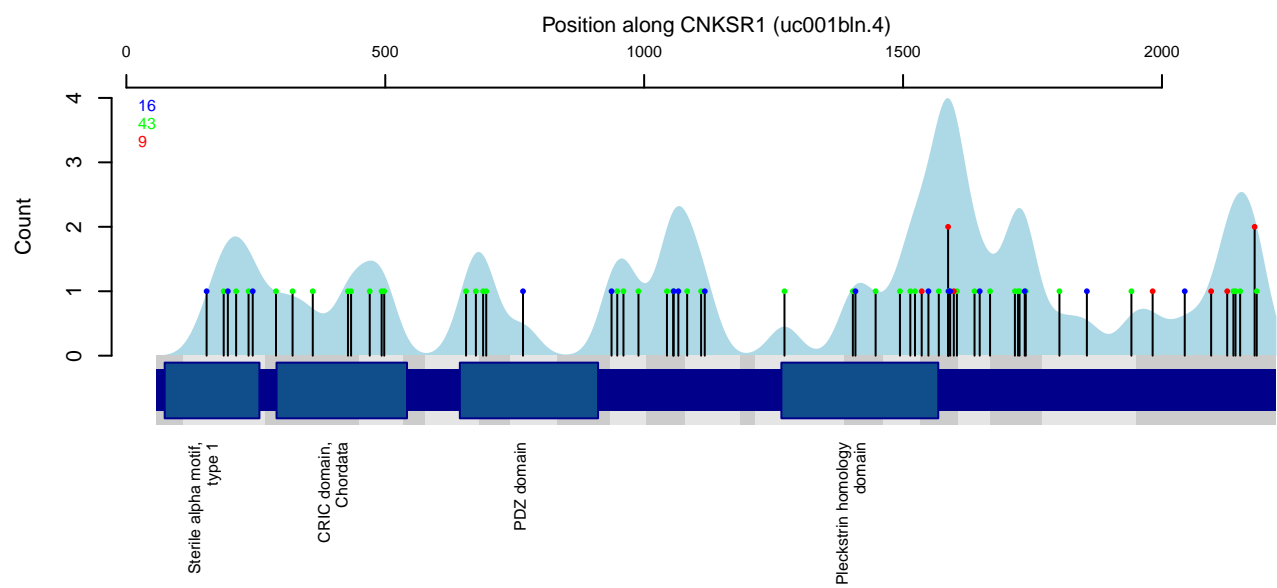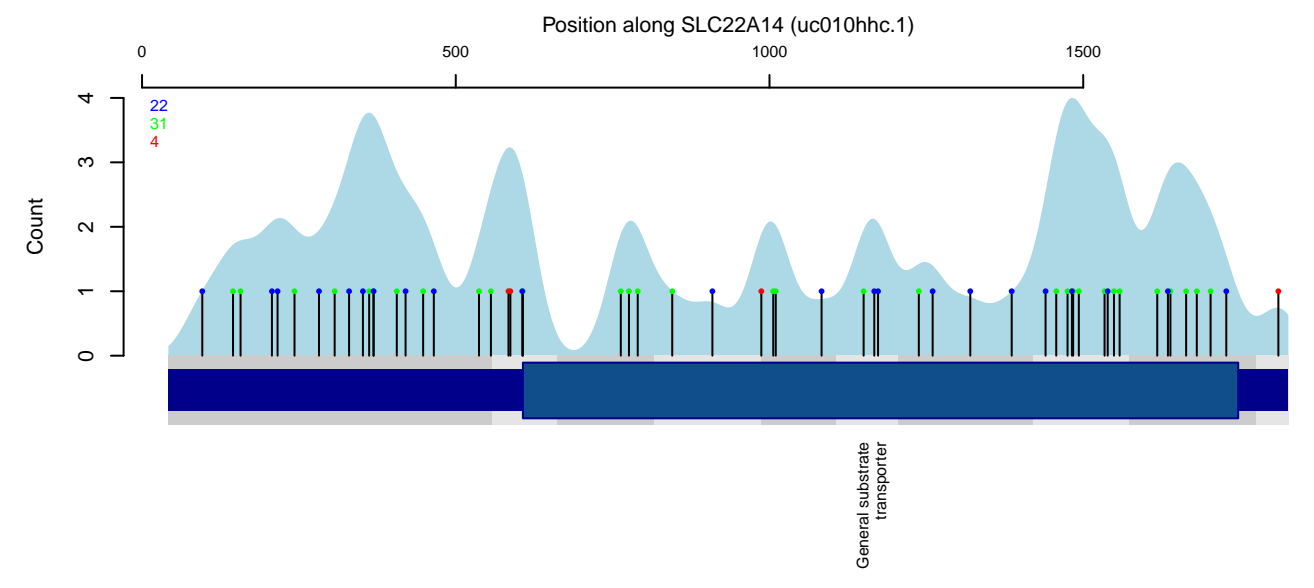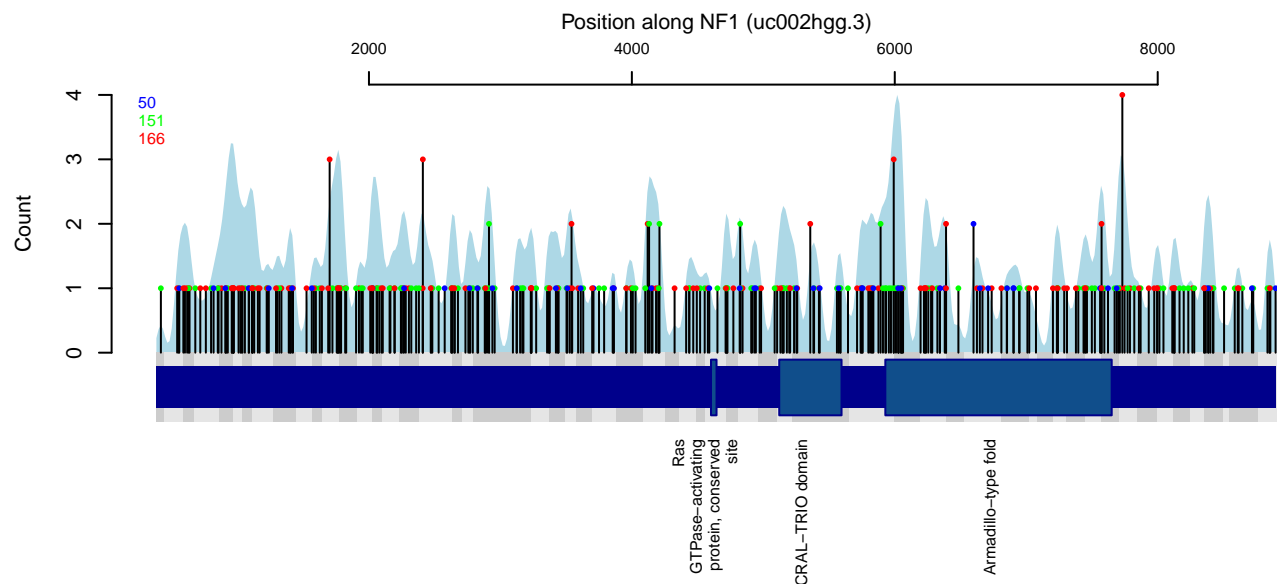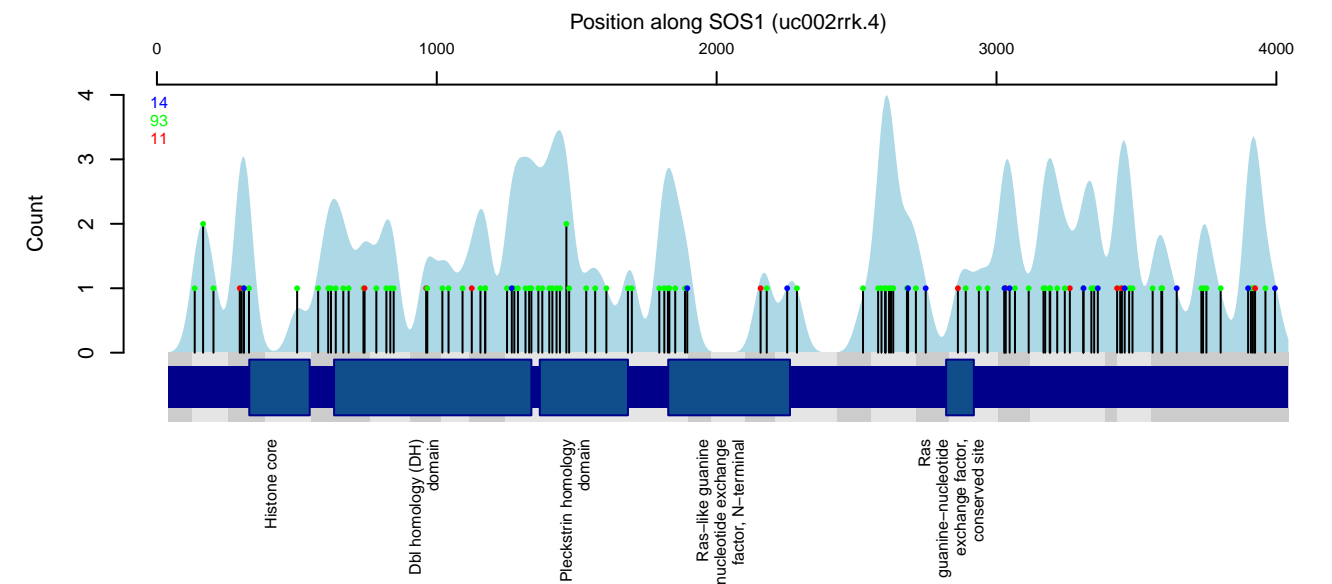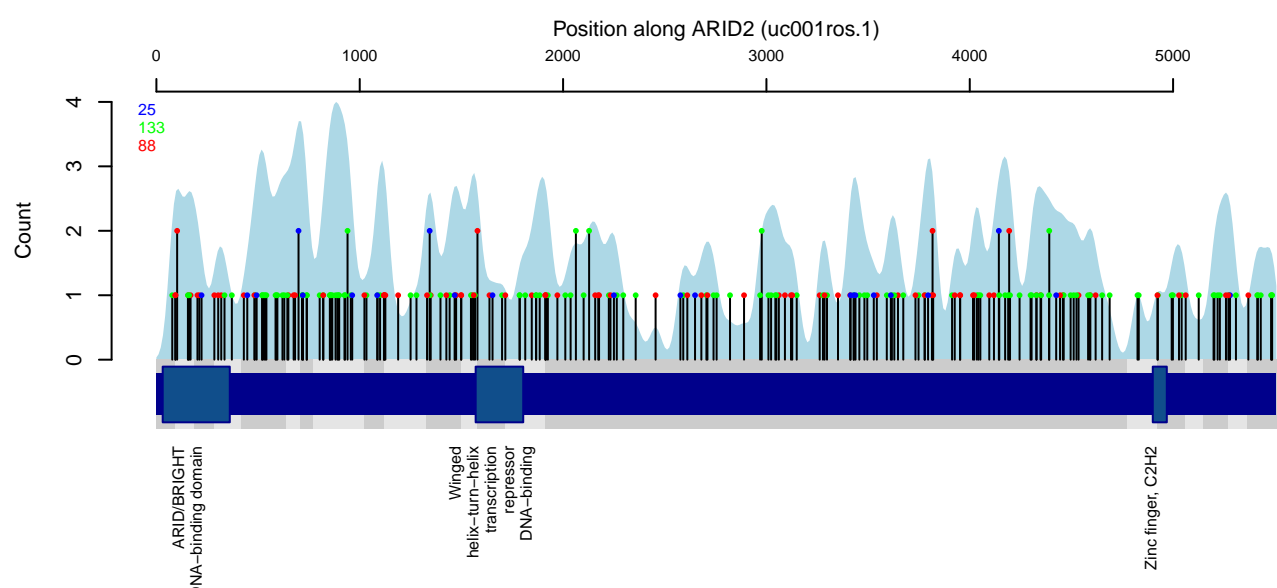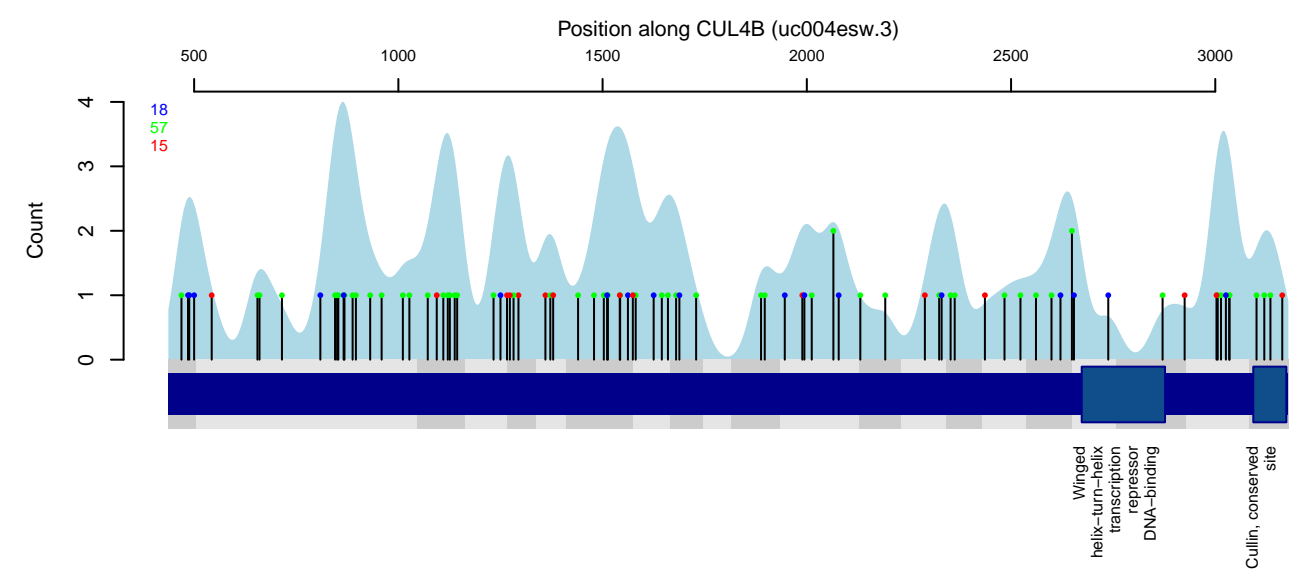

Data S5C, cont...

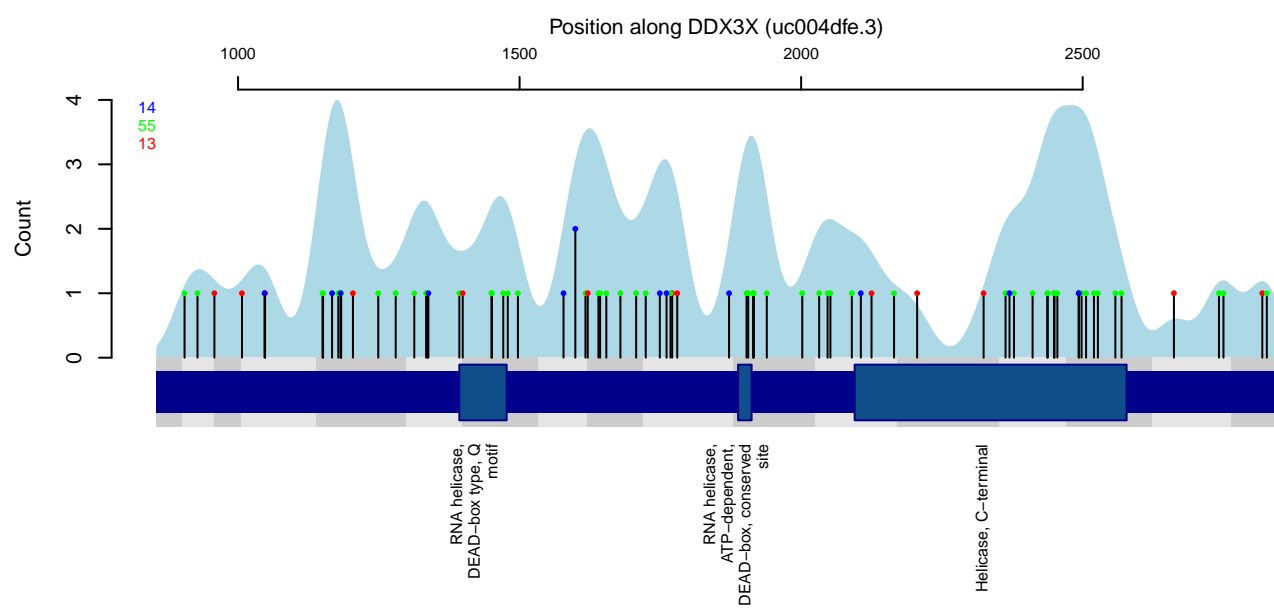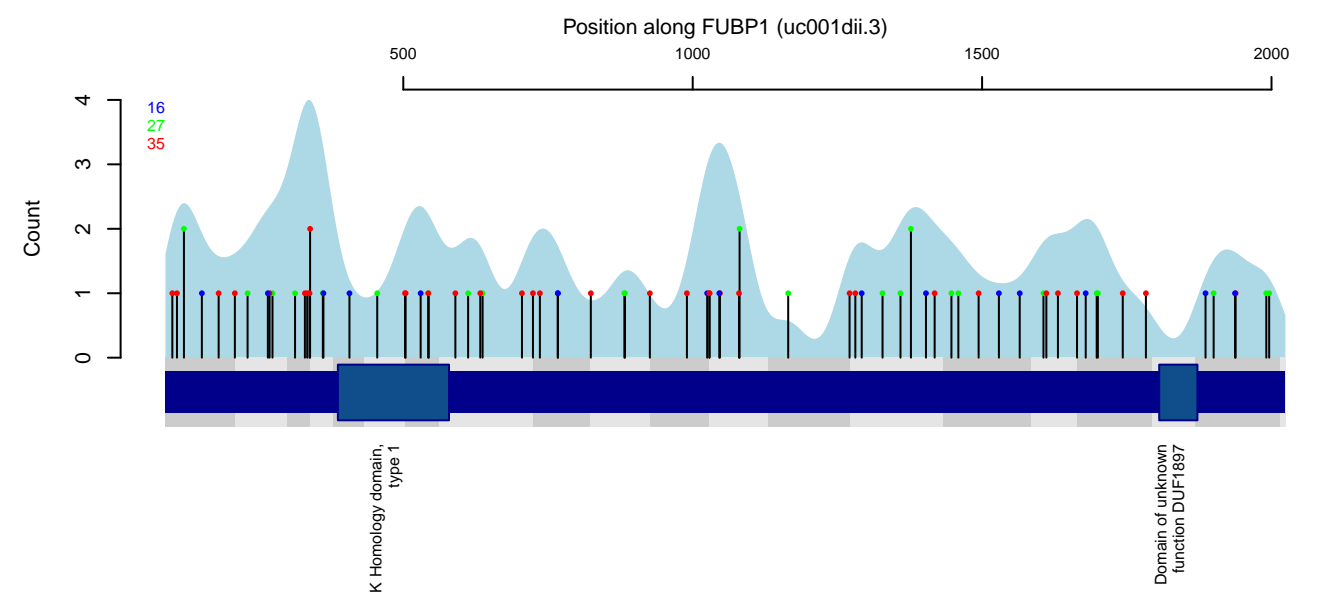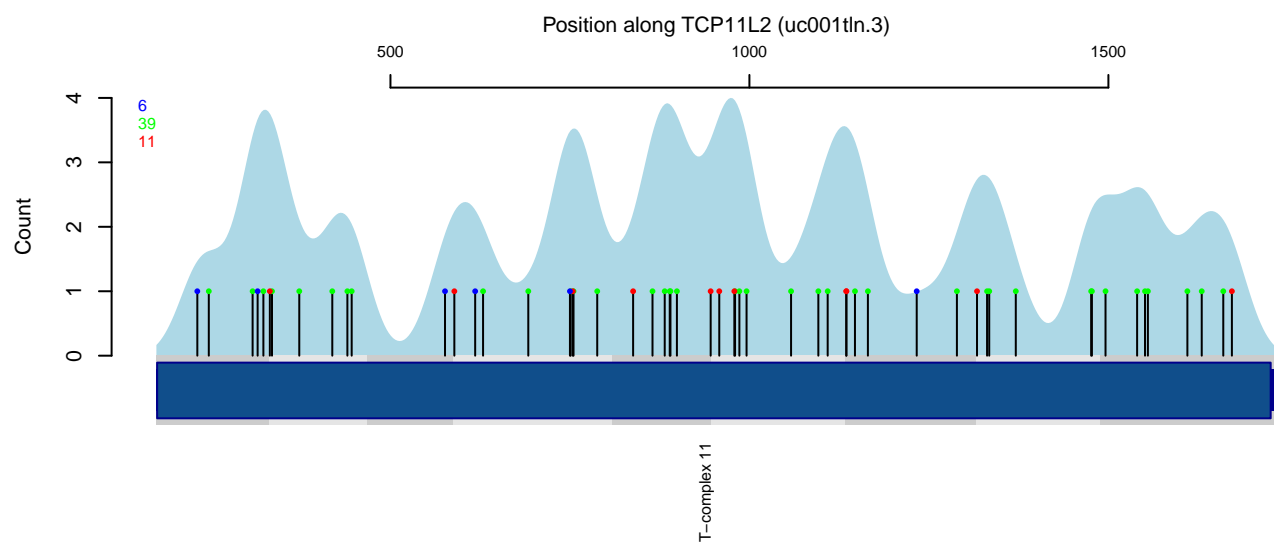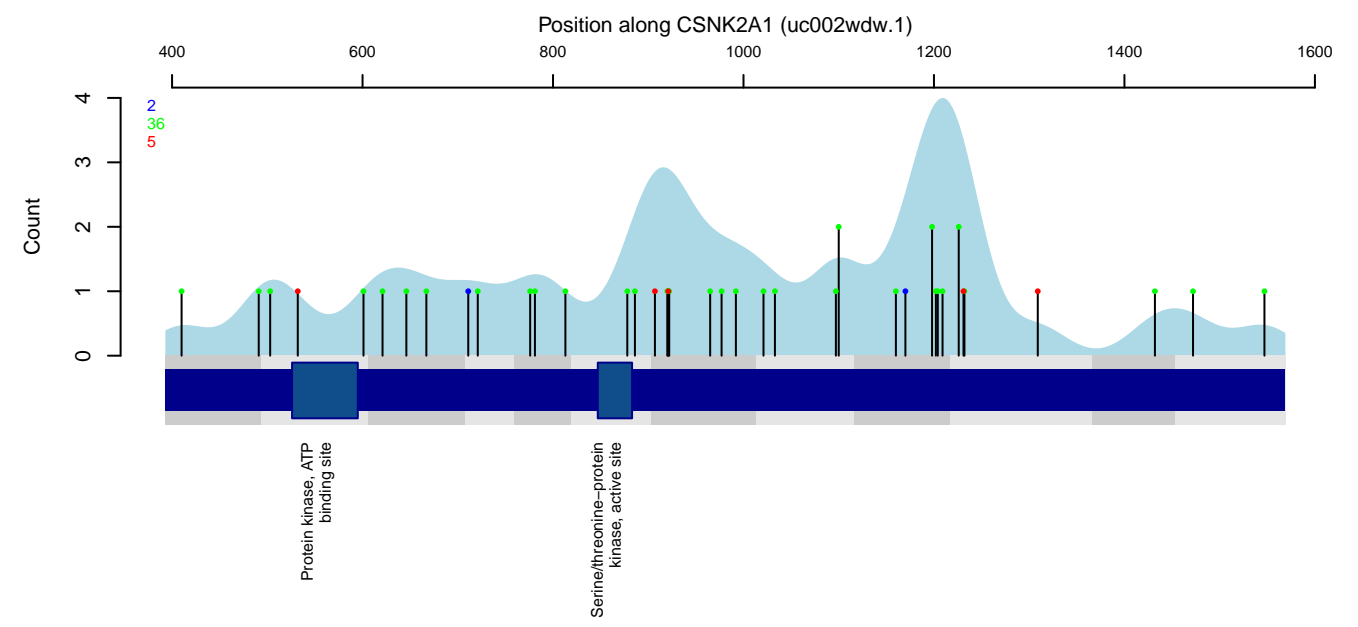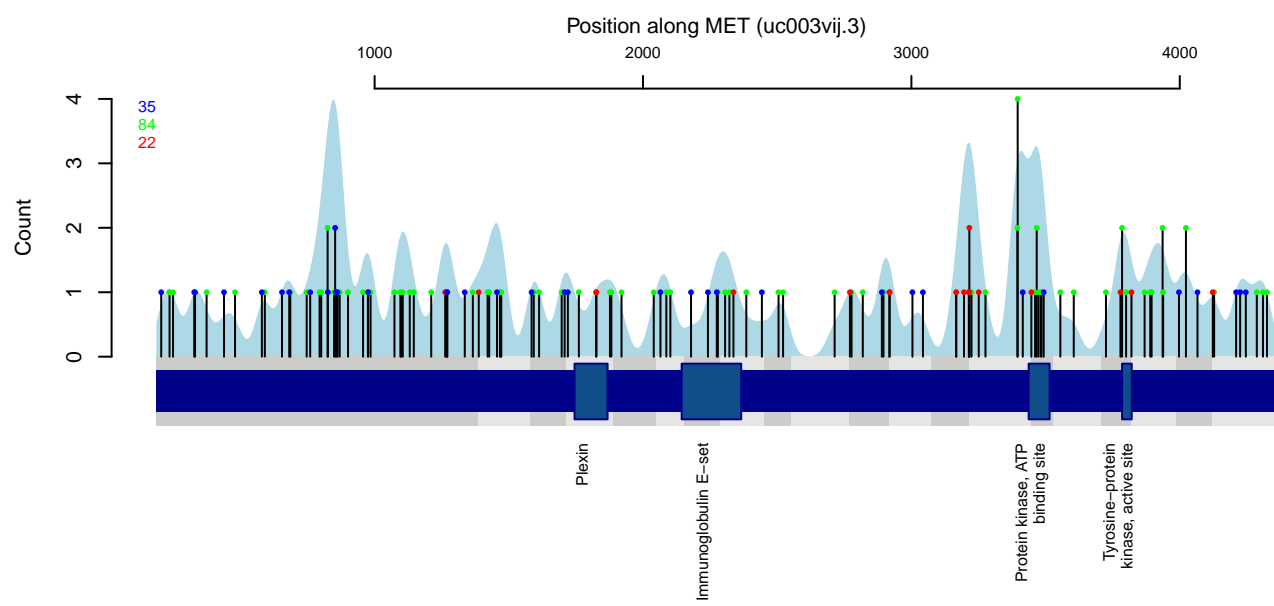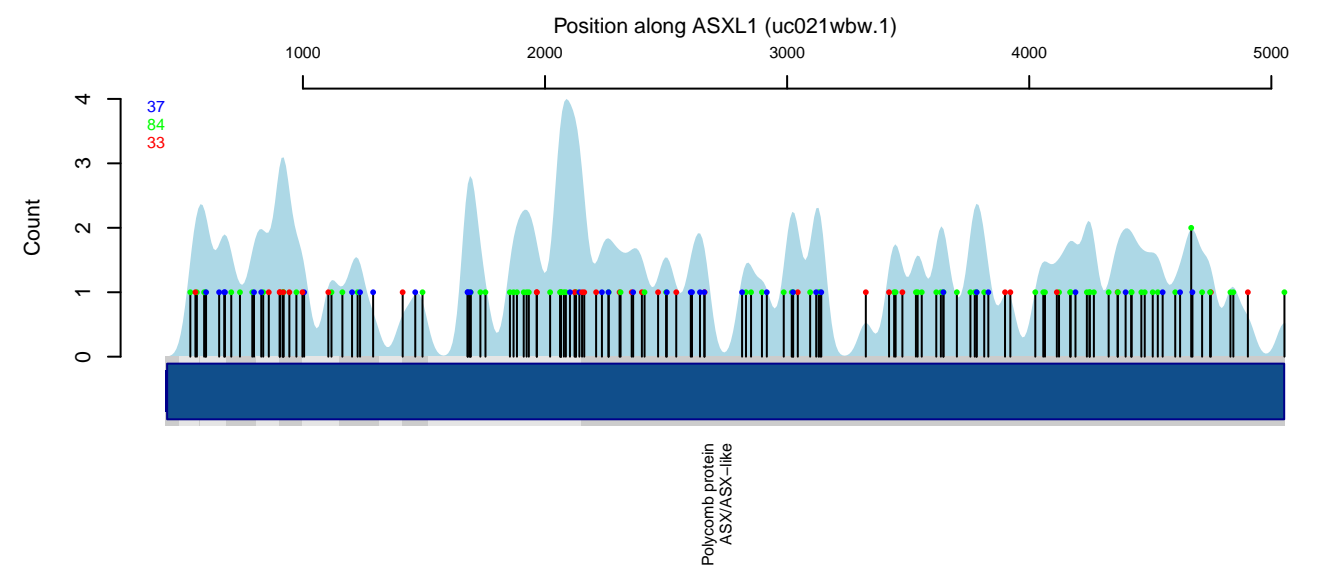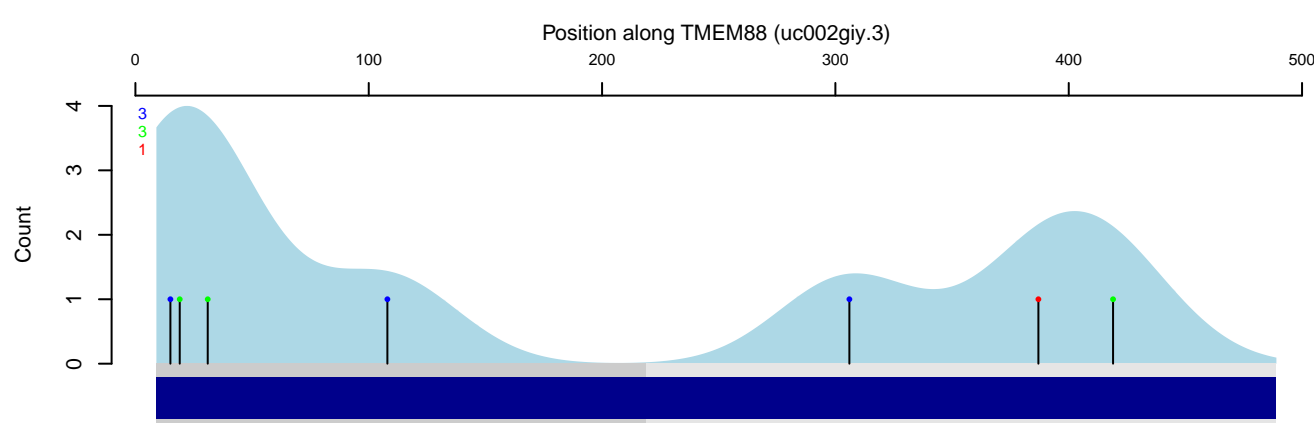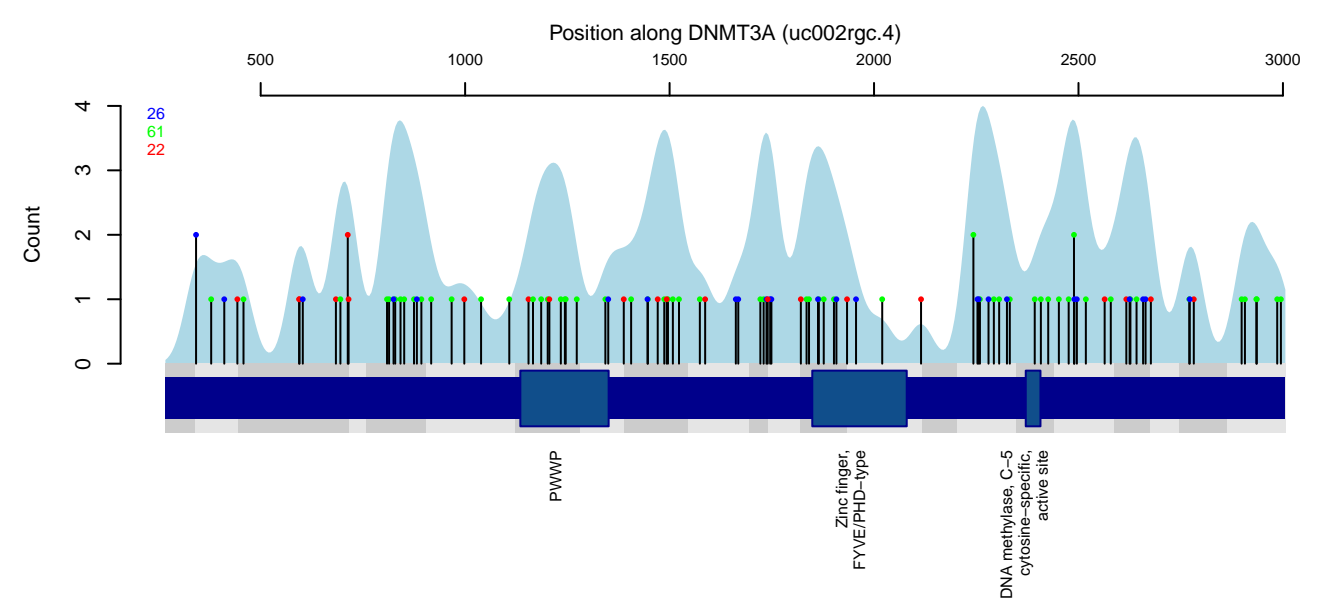

Data S5C, cont...

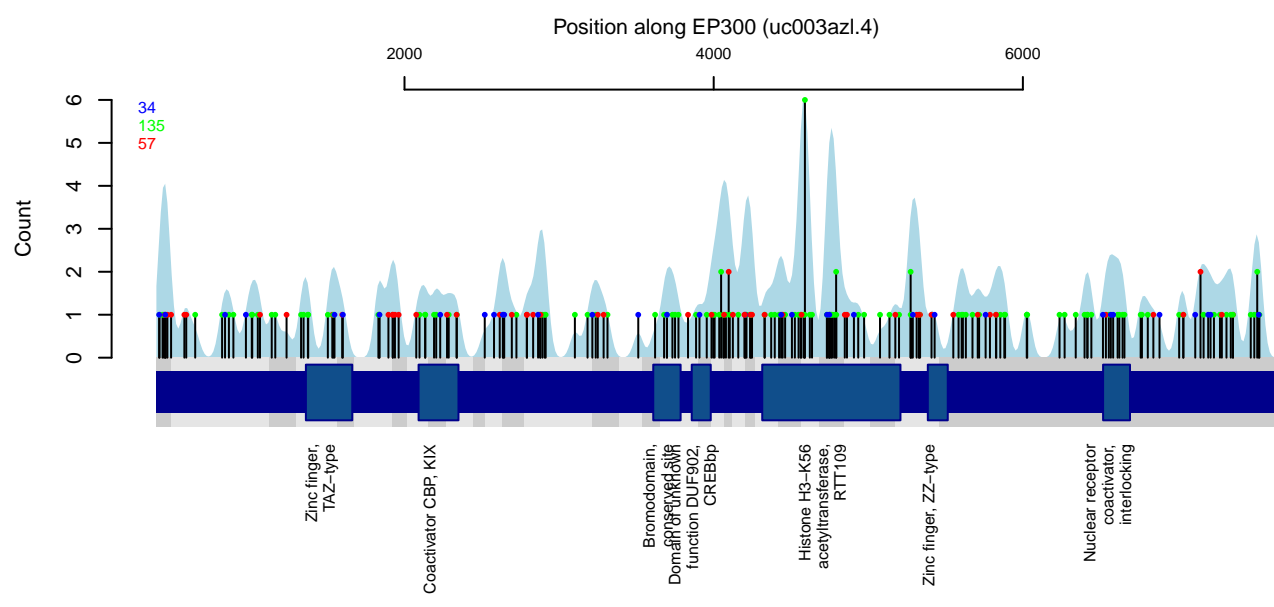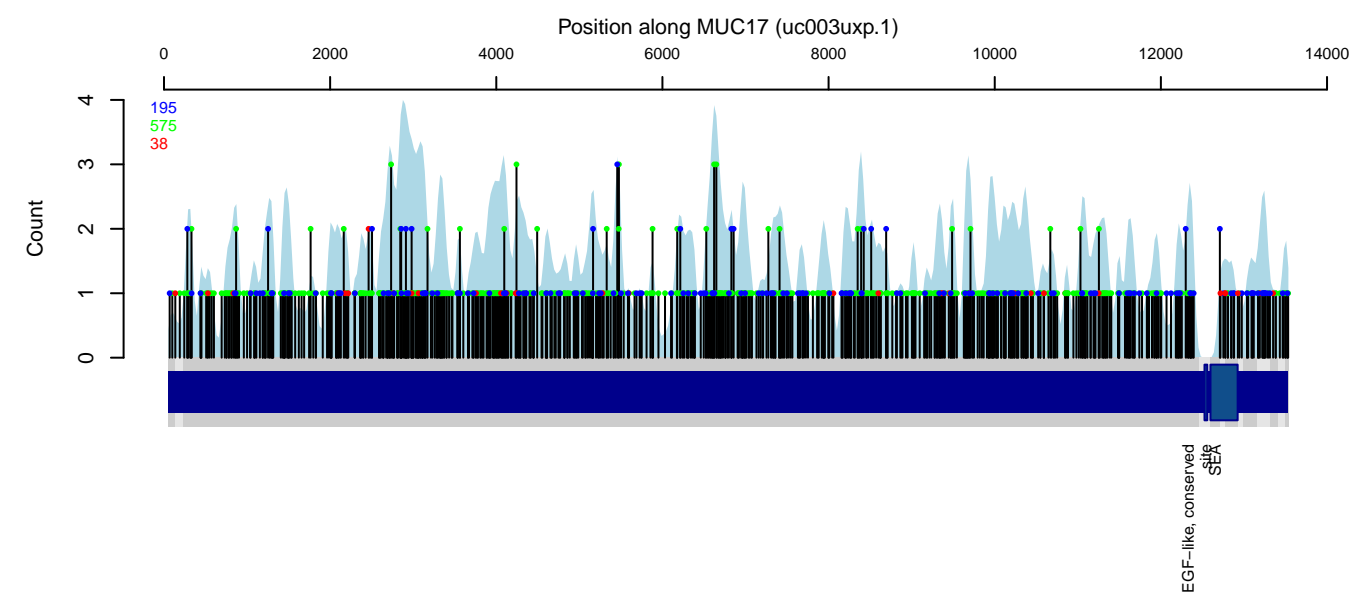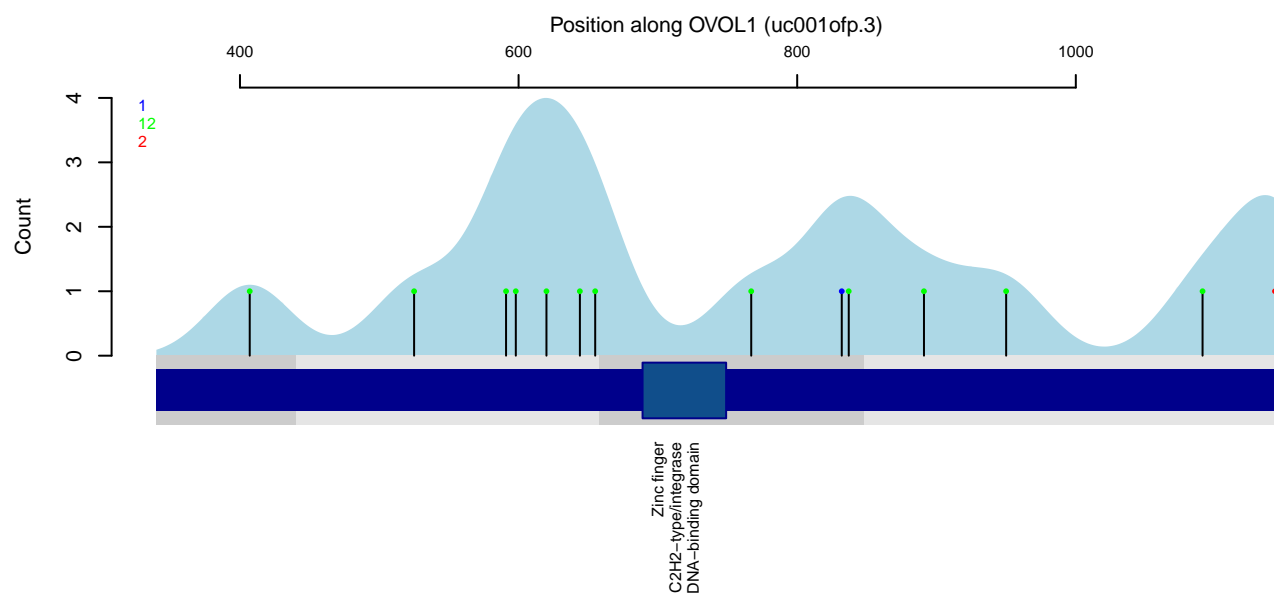

Supplement: NIHMS717941-supplement-DataS5.pdf [file NIHMS717941-supplement-DataS5.pdf]
