# Supplementary material
Source: PubMed Central journal article supplement (PMC4856474)

# Data S1A

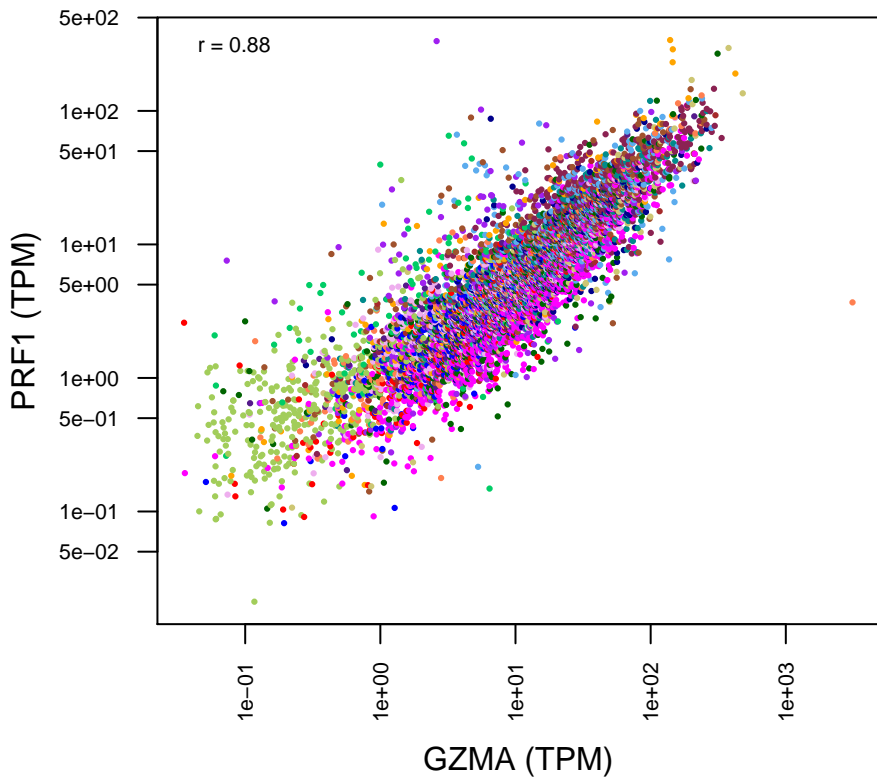

# Data S1B

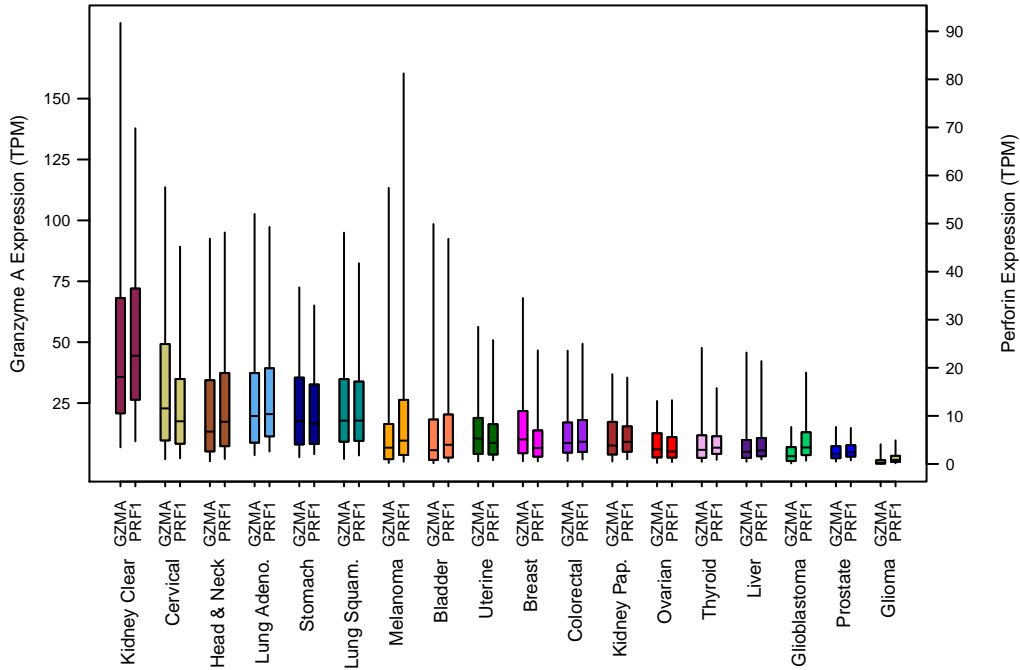

# Data S1C

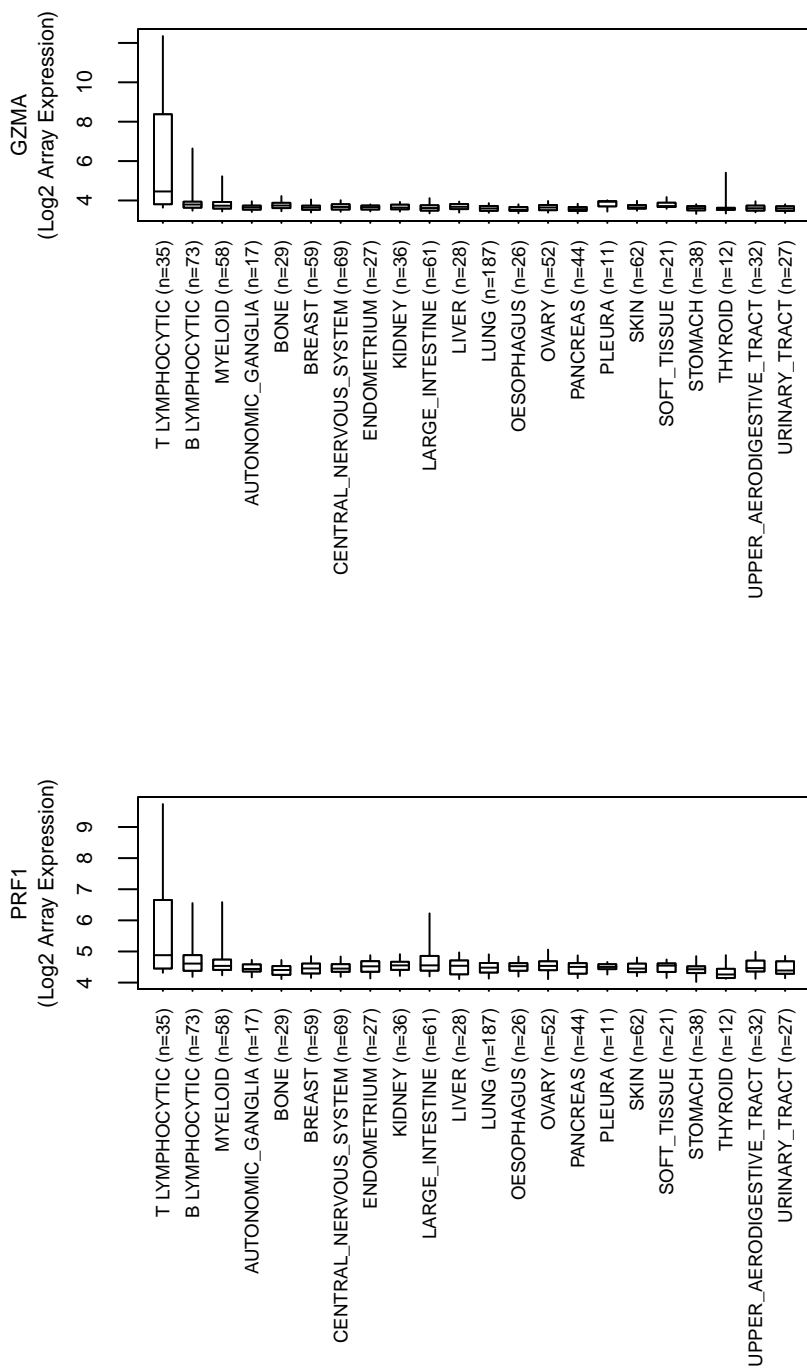

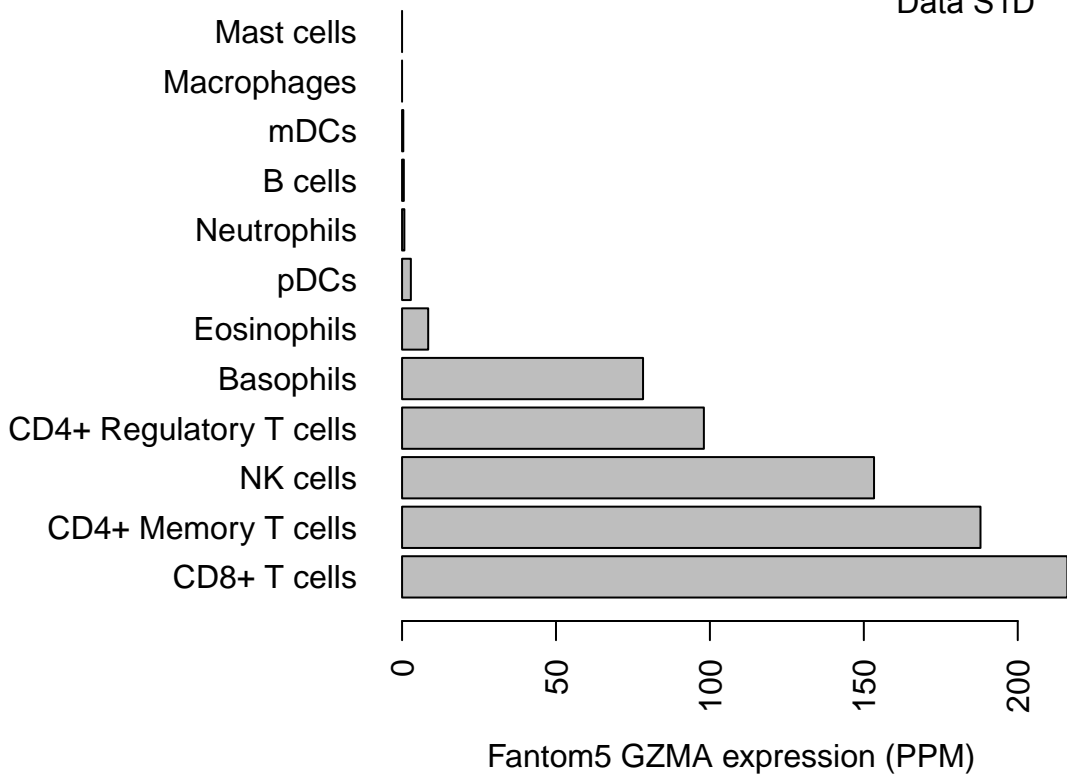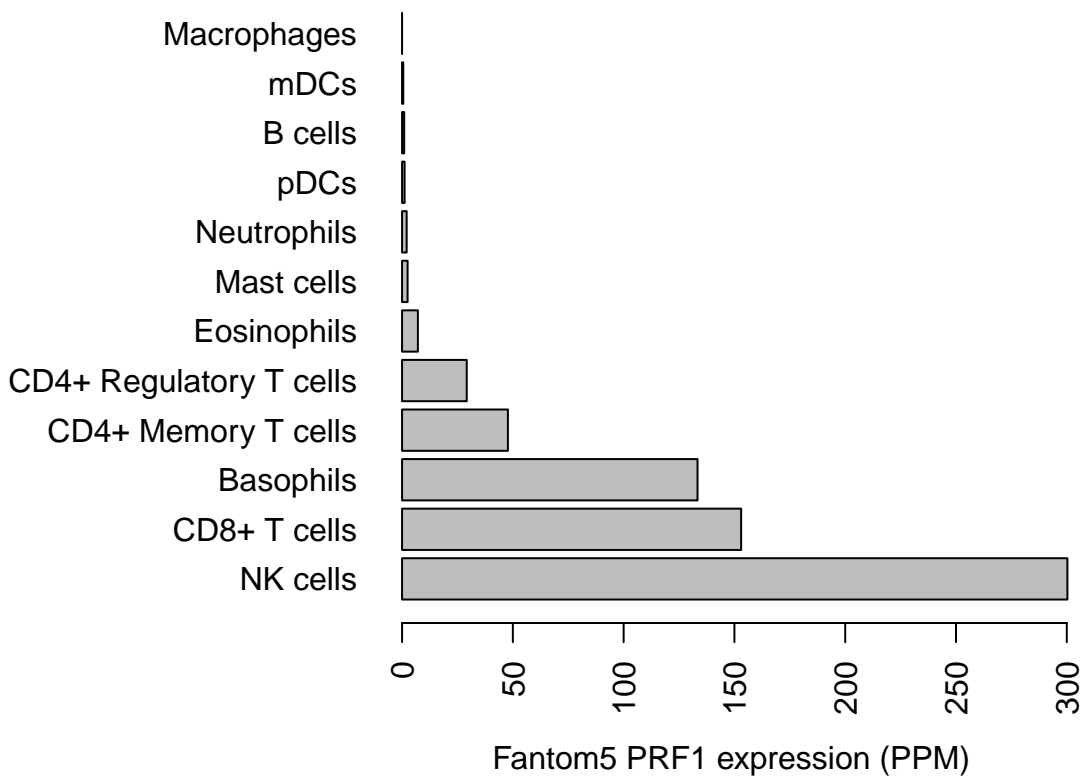

# Data S1E

Cytolytic Activity: GZMA, PRF1 log-average expression (TPM)

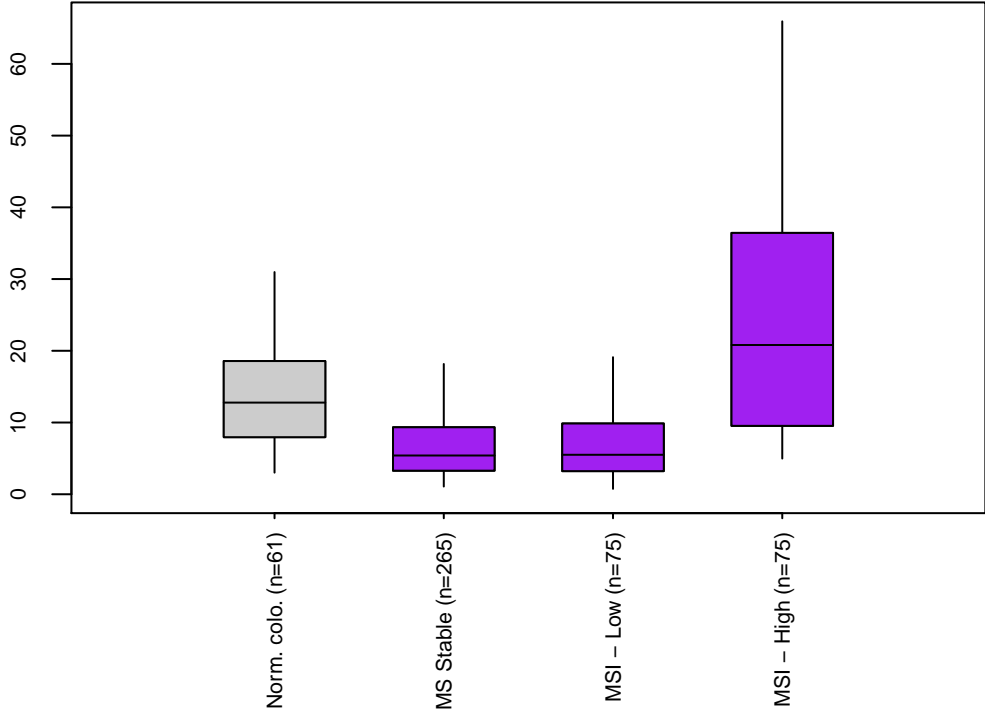

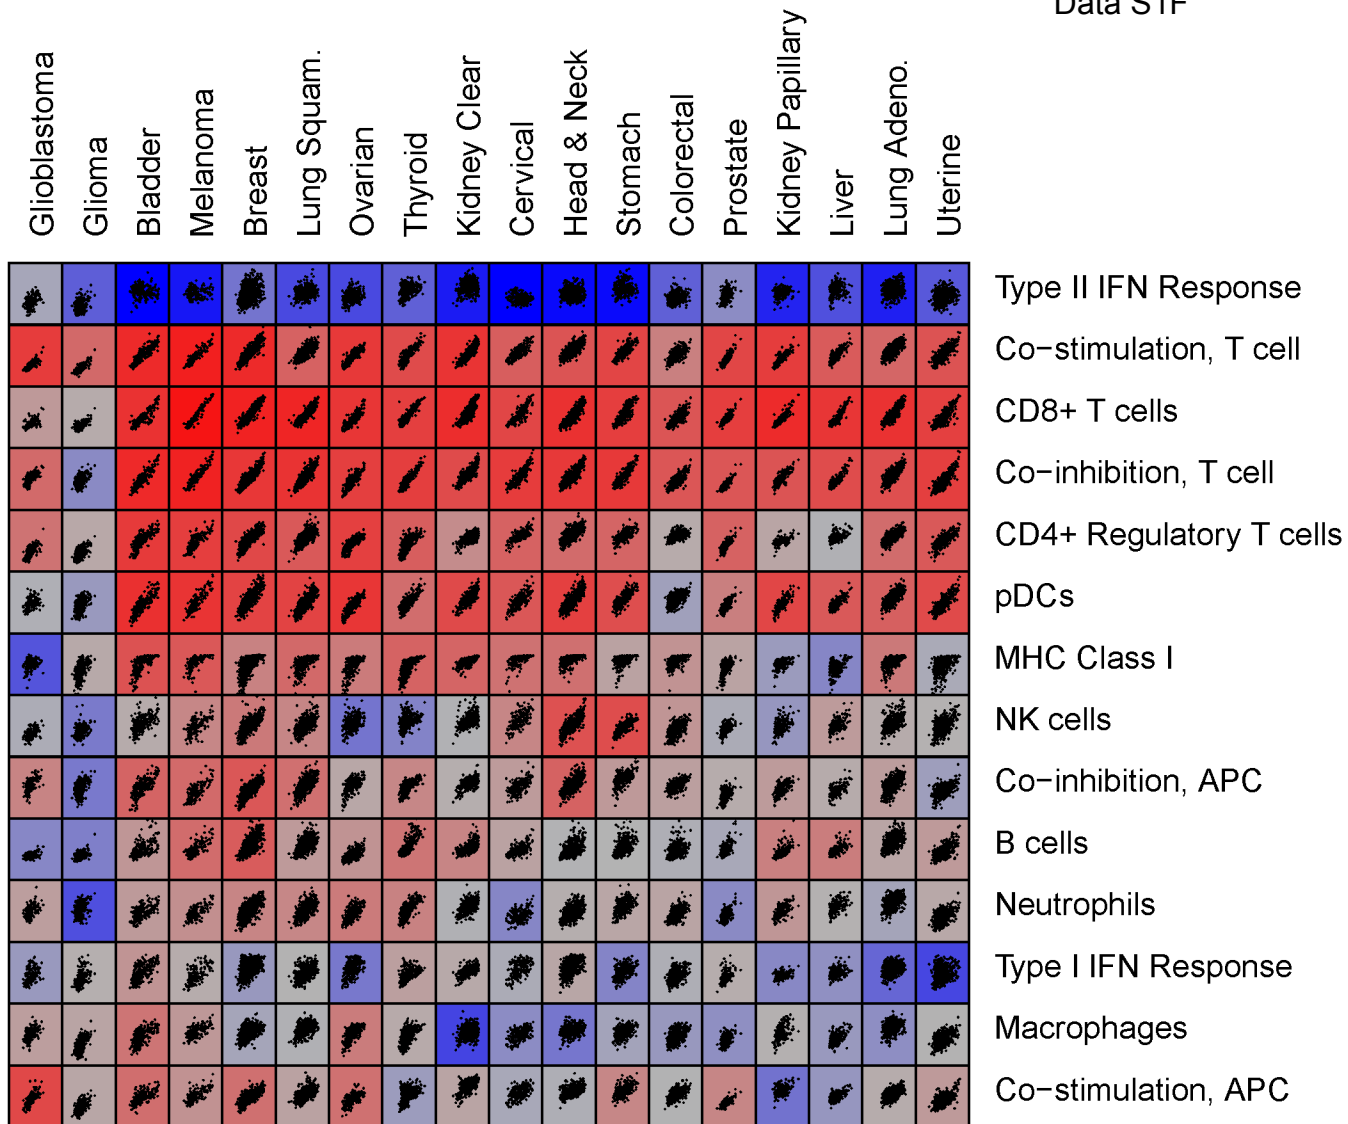

correlation with CYT

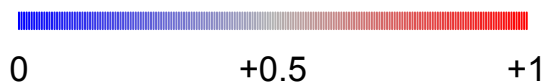

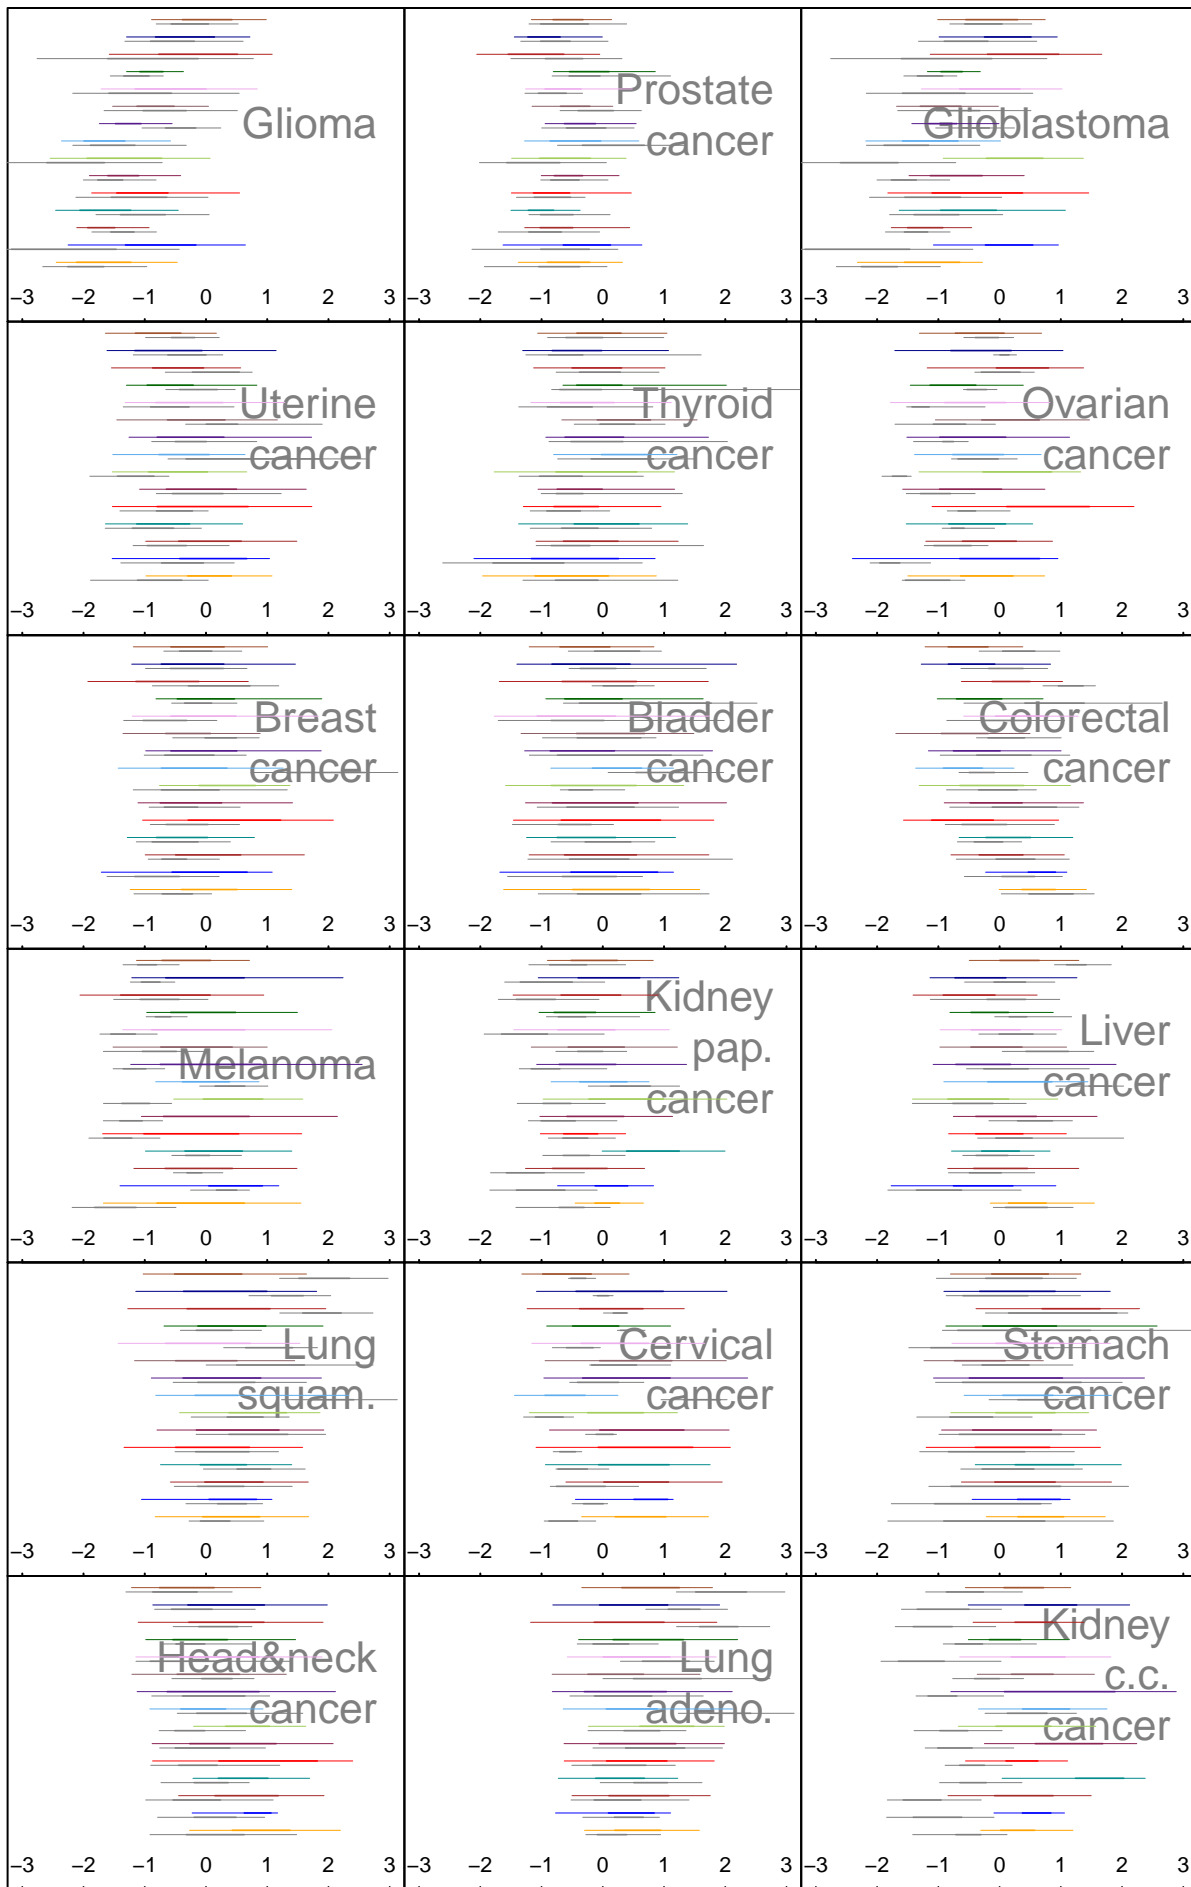

- Neutrophils
- Co-inhibition, T cell
- Co-inhibition, APC
- B cells
- pDCs
- NK cells
- CD8+ T cells
- Type II IFN Response
- Macrophages
- Cytolytic Activity
- Type I IFN Reponse
- Co-stimulation, APC
- Co-stimulation, T cell
- MHC Class I
- CD4+ Regulatory T cells
- Normal Ctrl.

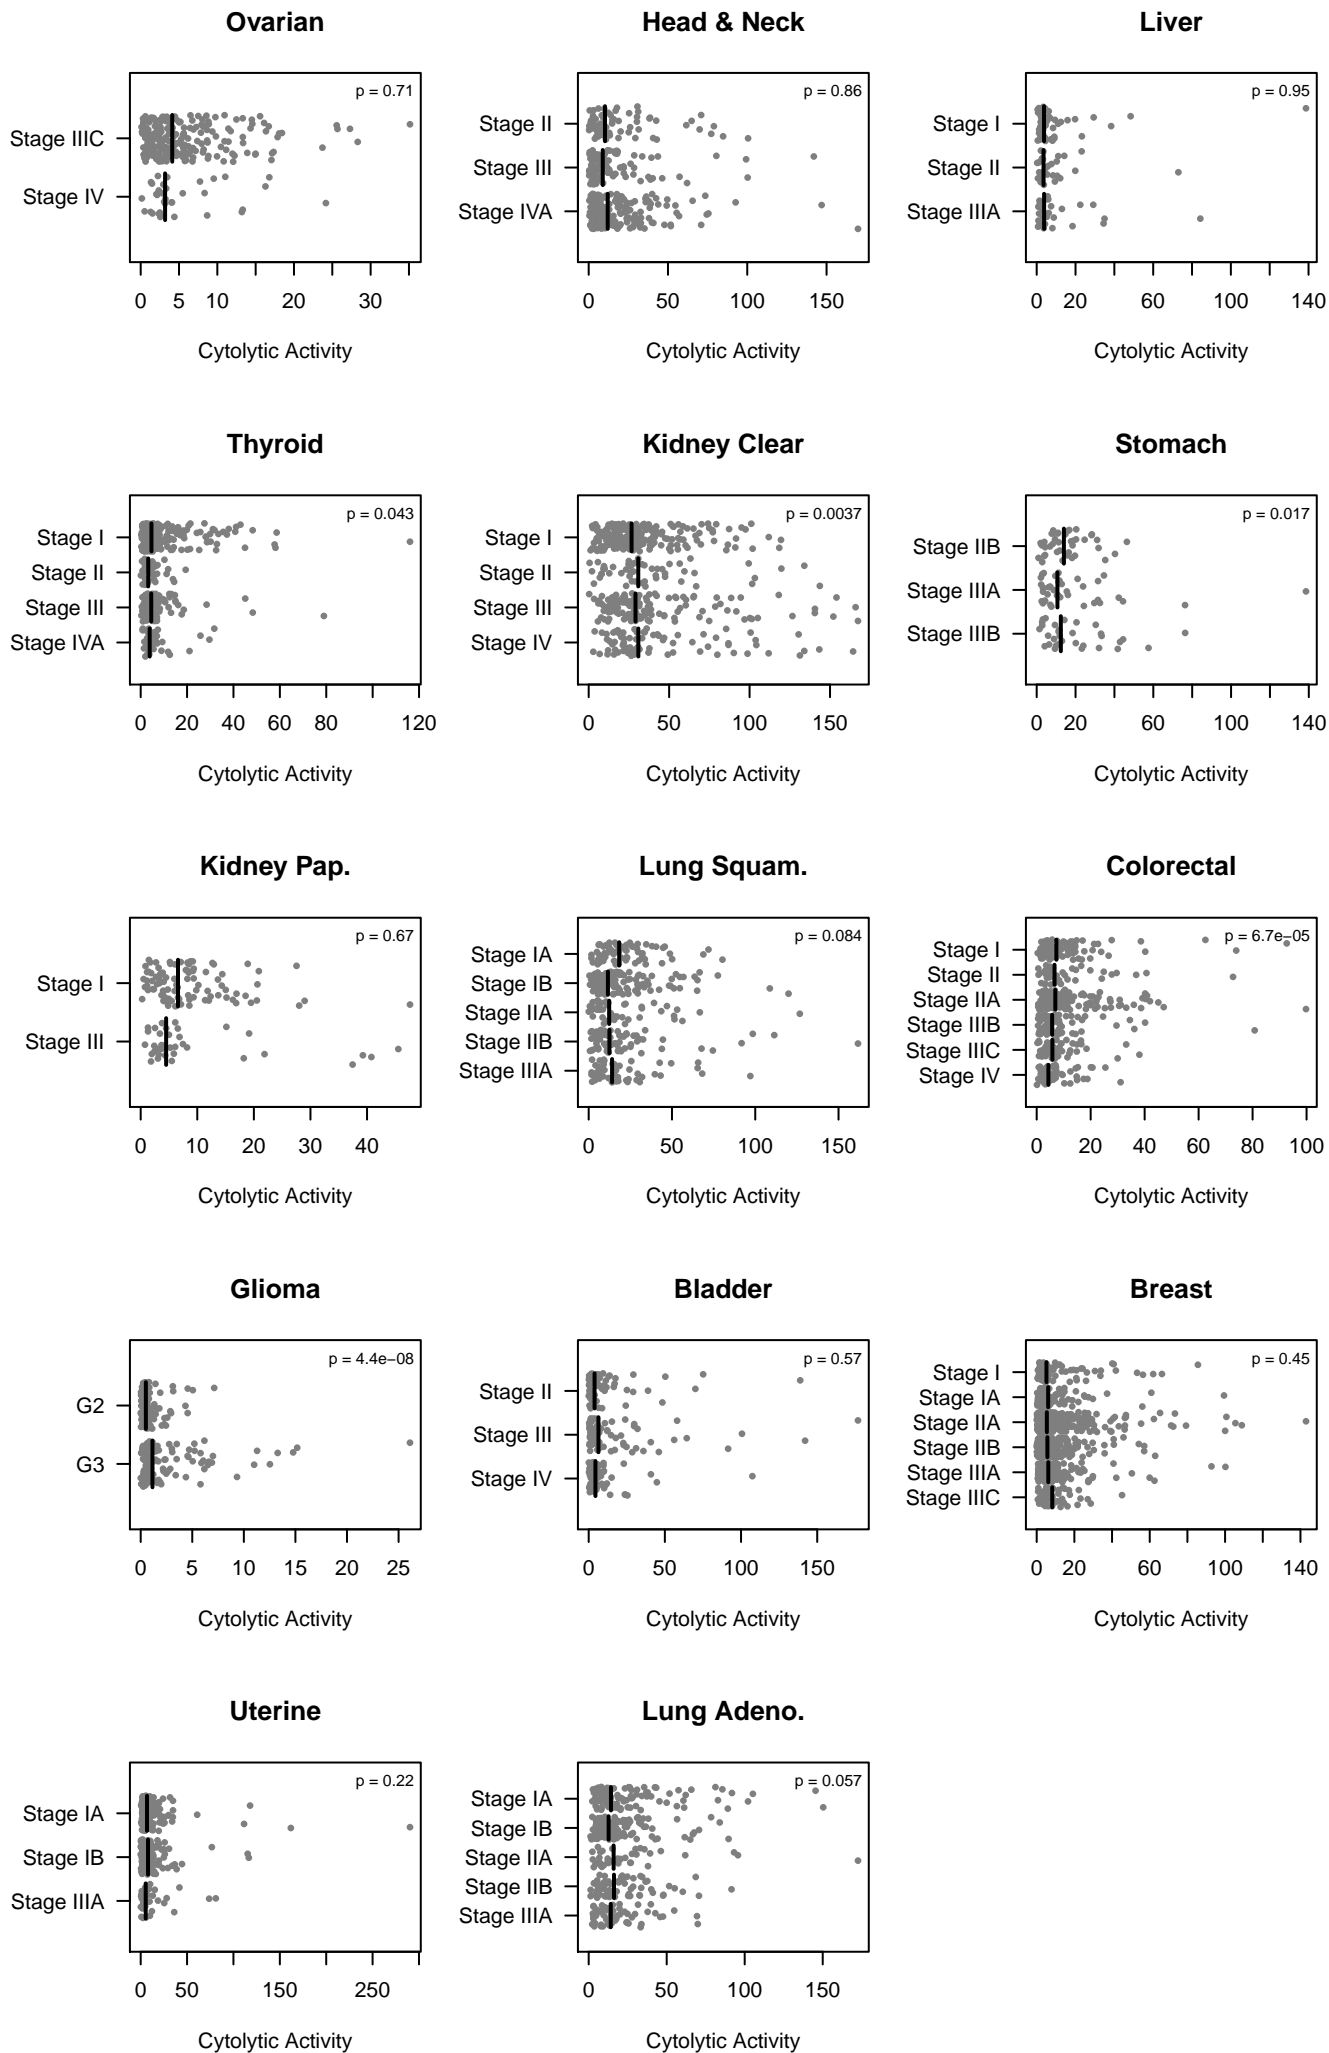



# Data S11

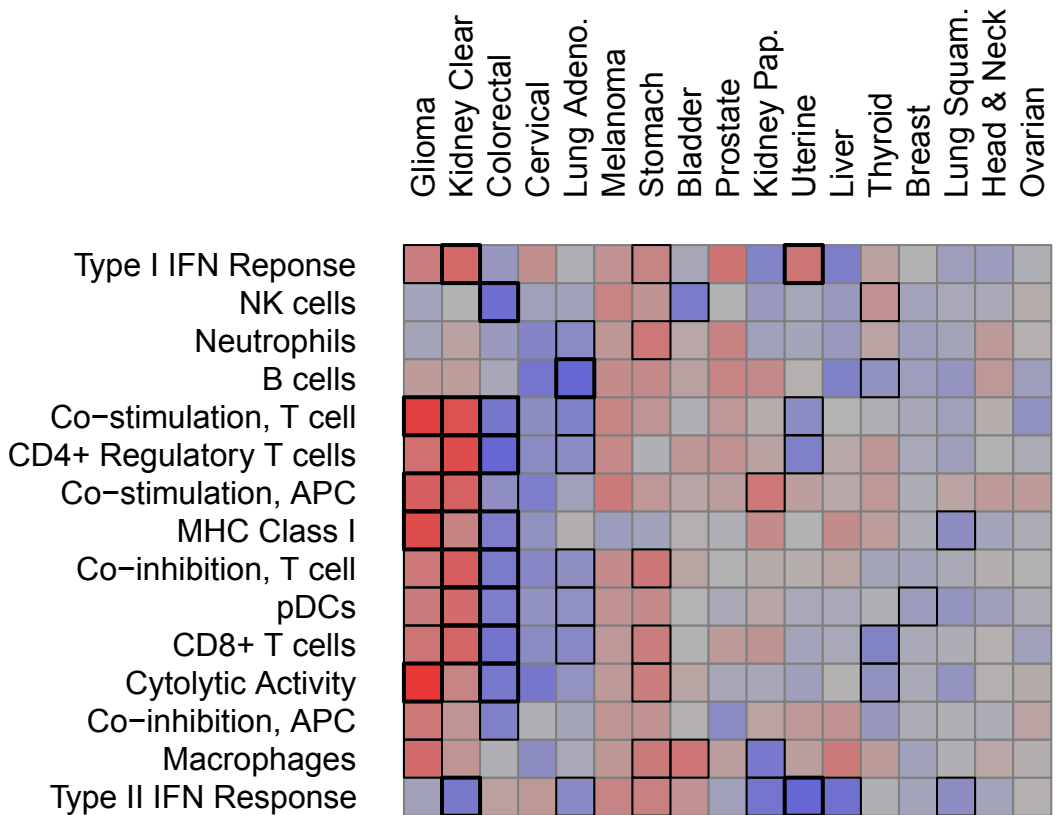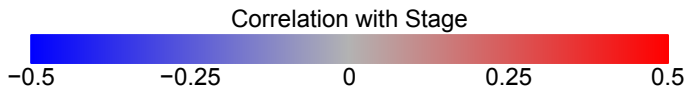

□ p < 0.05

□ p < 0.0005

# Data S1J

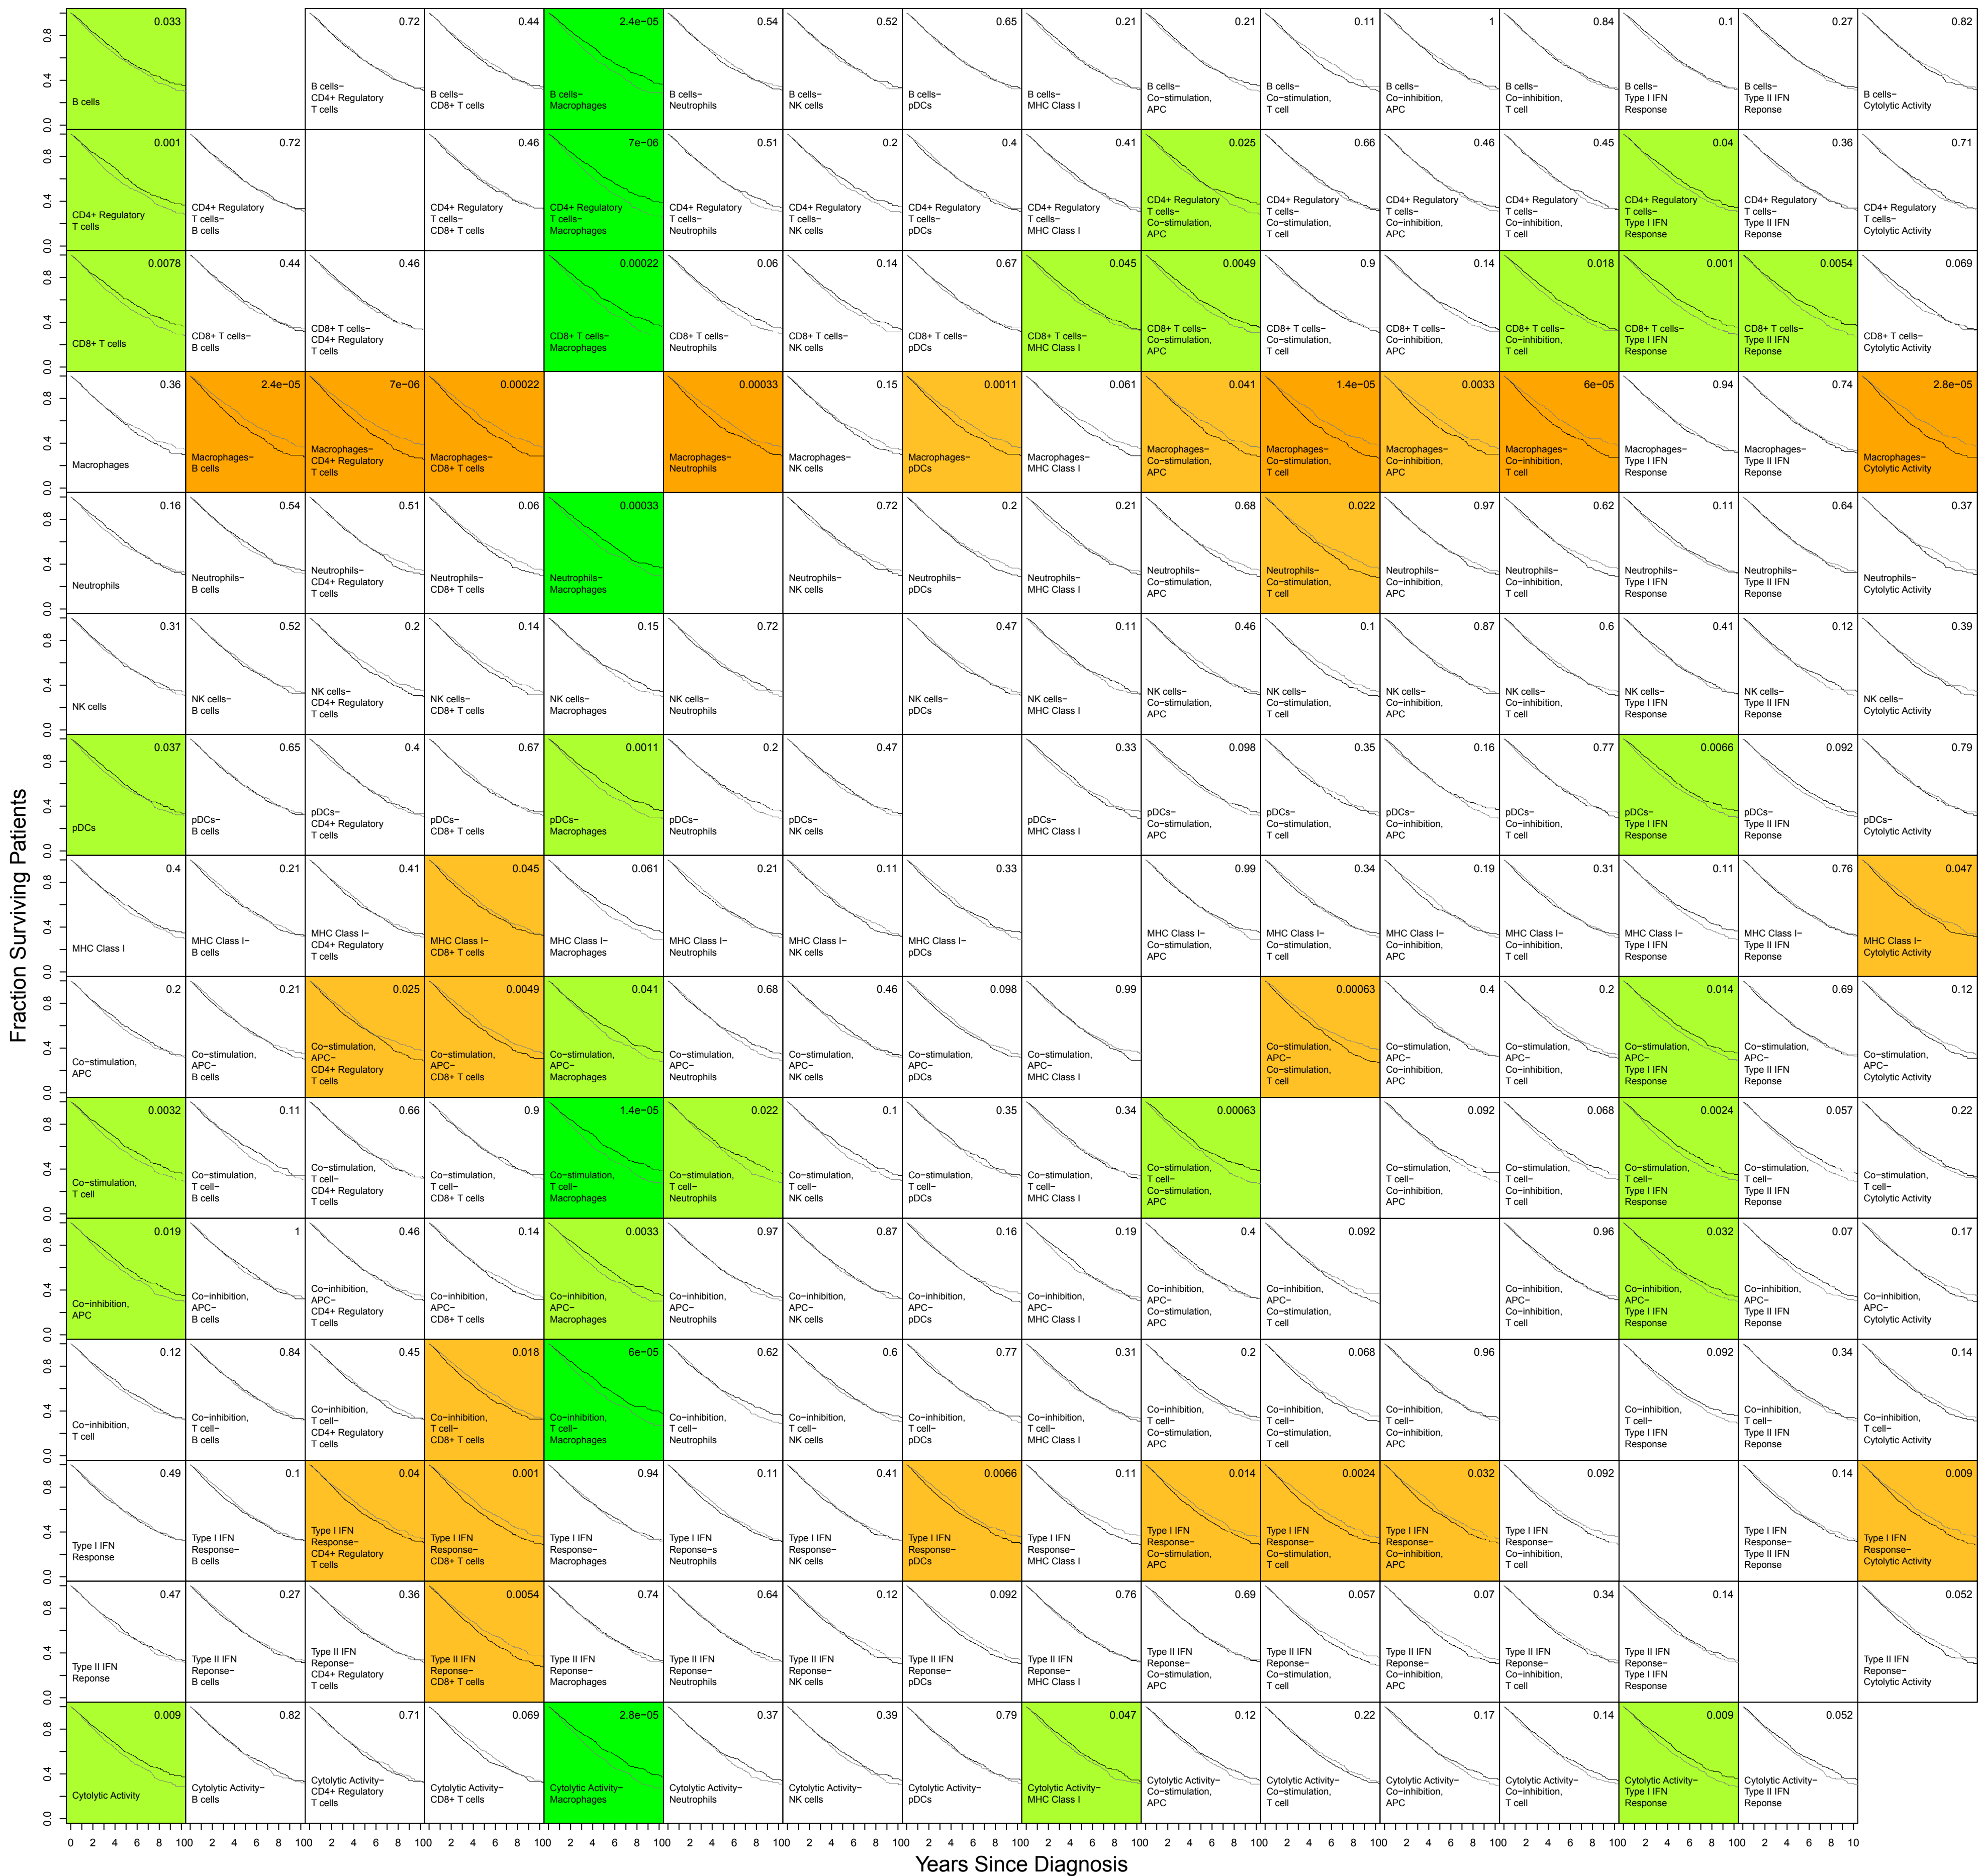

Supplement: NIHMS717941-supplement-DataS1.pdf [file NIHMS717941-supplement-DataS1.pdf]
