# Supplementary material
Source: PubMed Central journal article supplement (PMC4856474)
Supplement: NIHMS717941-supplement-DataS2.pdf [file NIHMS717941-supplement-DataS2.pdf]

## EBV



Depth of Reads Mapped Pan-Cancer



Position in GenBank KC207813

# HBV



## HCV



Depth of Reads Mapped Pan-Cancer



## HPV



Depth of Reads Mapped Pan-Cancer



Position in GenBank HQ644299

## Kaposi Sarcoma Virus



Depth of Reads Mapped Pan-Cancer



## BK polyoma virus



Depth of Reads Mapped Pan-Cancer



## Merkel cell polyoma virus



Depth of Reads Mapped Pan-Cancer





Data S2C



p < 0.05

p < 0.0005



# Data S2E

Type of Mutation

Mutation Context for each 4x4 Grid



High-CYT Samples (top 25%)

Low-CYT Samples (bottom 25%)

Arithmetic Difference





High-CYT Samples (top 25%)

Low-CYT Samples (bottom 25%)

Arithmetic Difference



High-CYT Samples (top 25%)

Low-CYT Samples (bottom 25%)

Arithmetic Difference
