# Supplementary material
Source: PubMed Central journal article supplement (PMC4856474)

# Data S3A

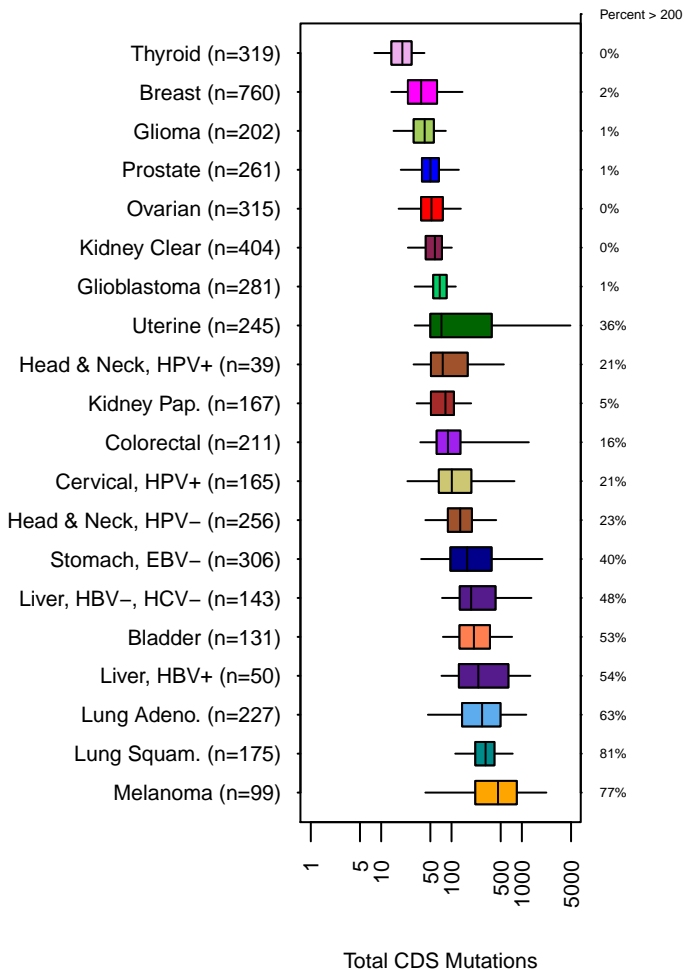

# Data S3B

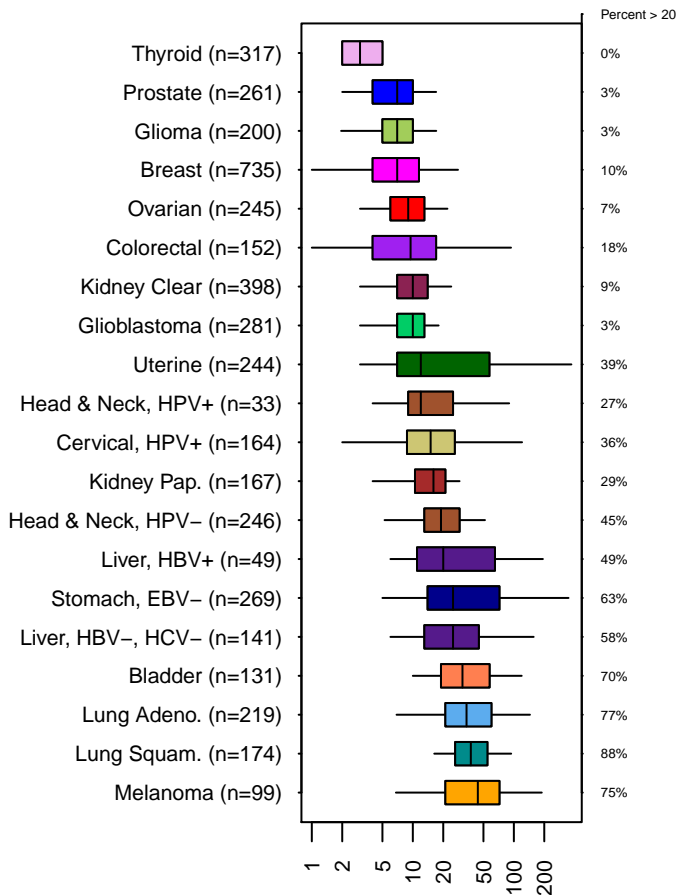

Mutations Yielding Predicted HLA Binders

# Data S3C

## Lung Squamous Cell Carcinoma

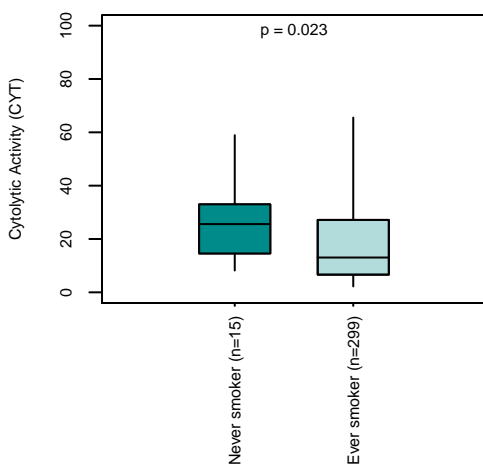

## Lung Adenocarcinoma

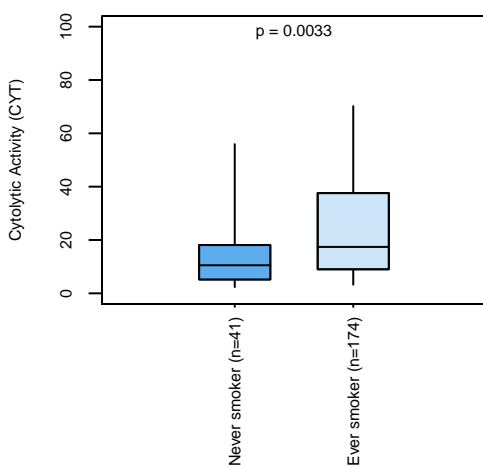

## Head and Neck Cancer

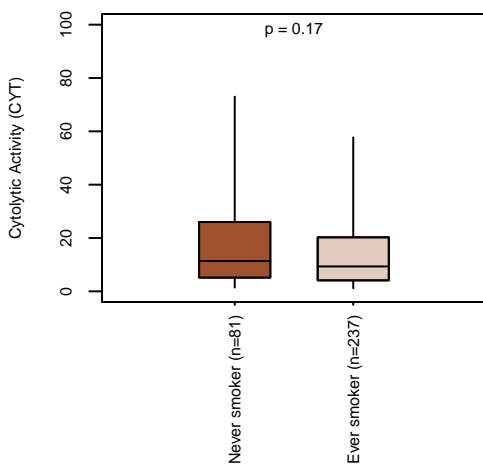

# Data S3D

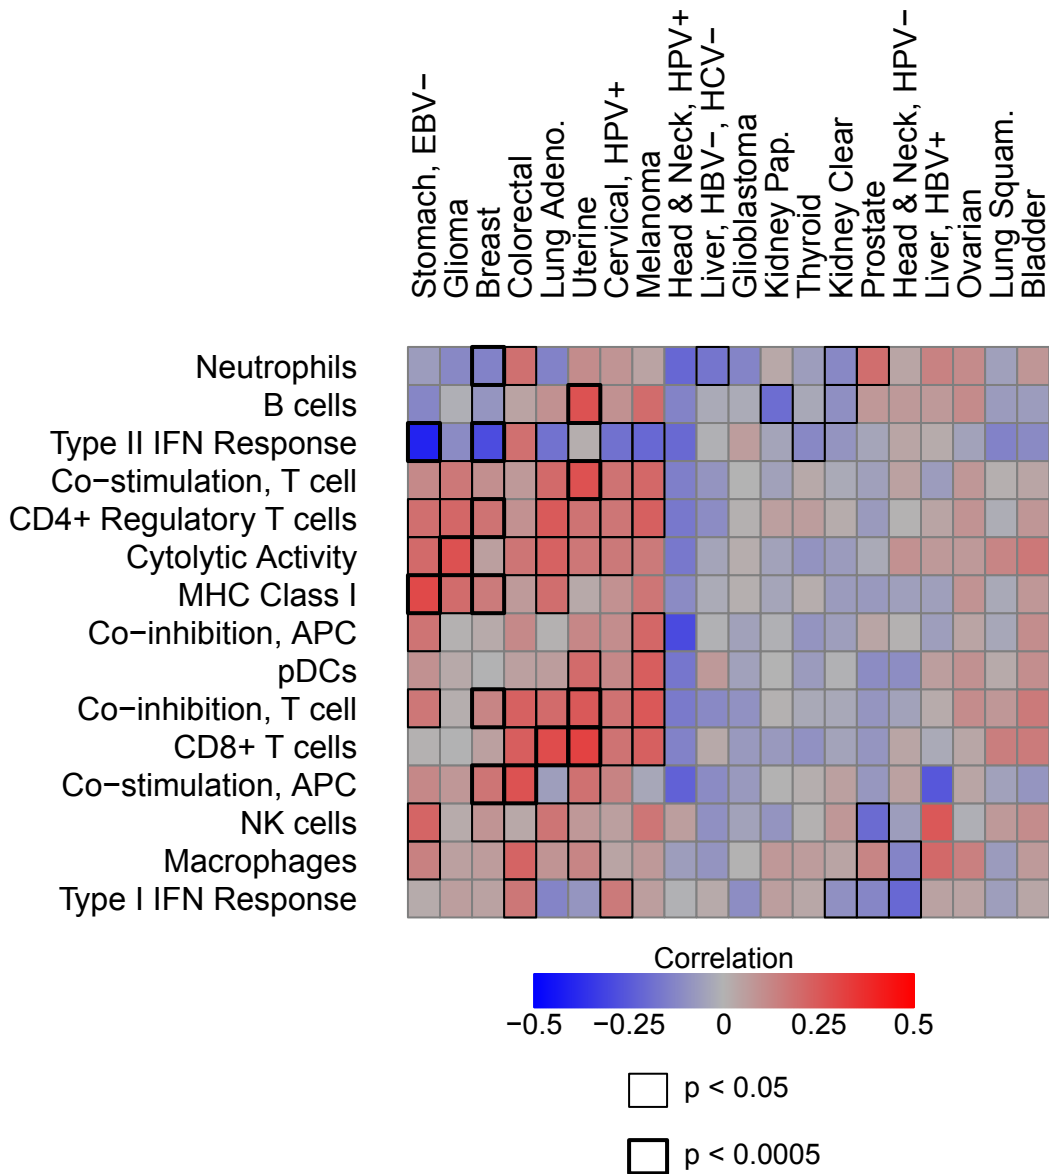

Data S3E

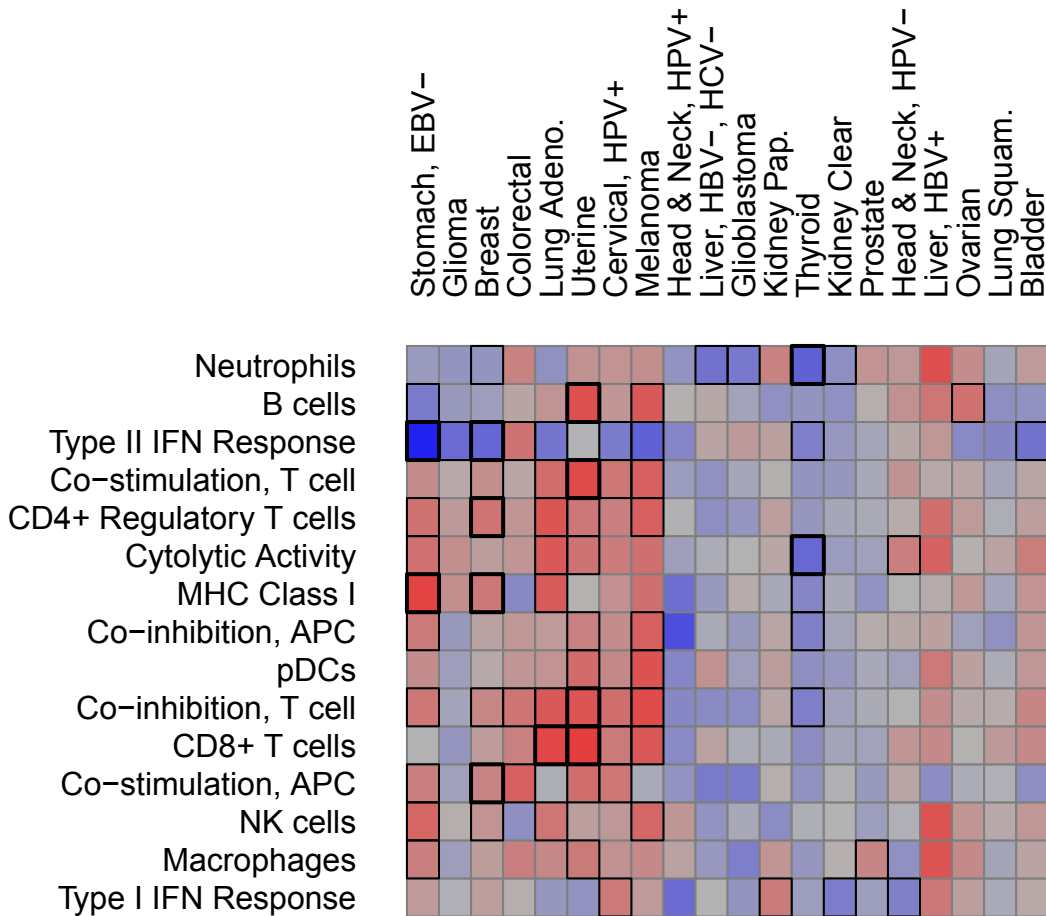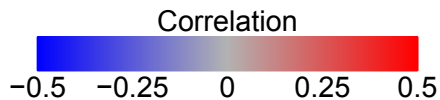

□ p < 0.05

□ p < 0.0005

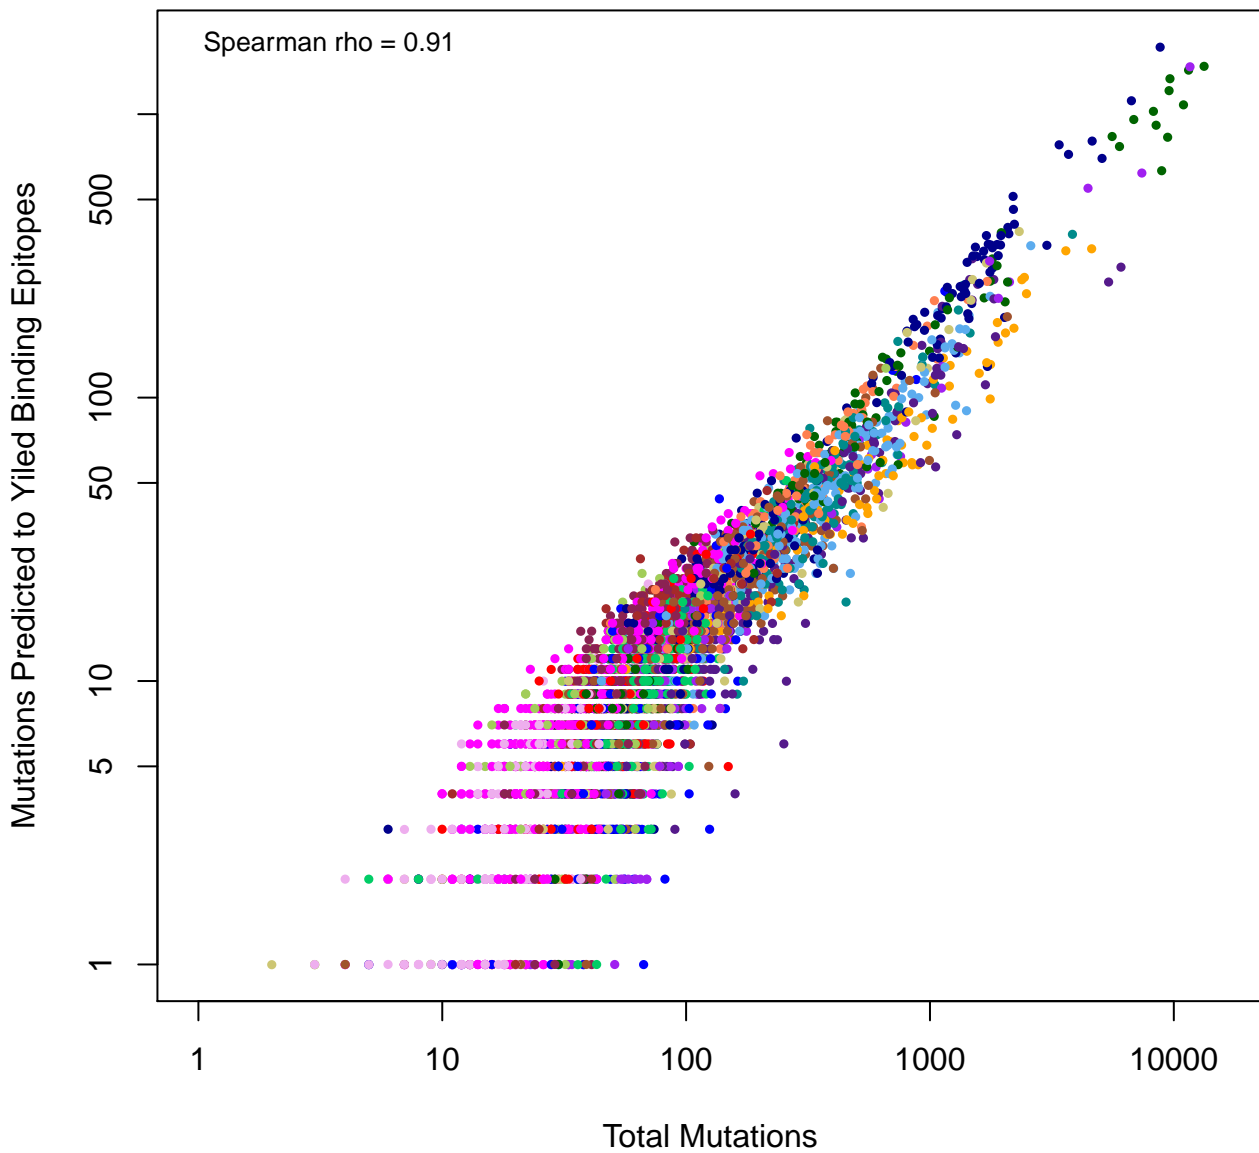

Supplement: NIHMS717941-supplement-DataS3.pdf [file NIHMS717941-supplement-DataS3.pdf]
