# Supplementary material
Source: PubMed Central journal article supplement (PMC4856474)

# Data S6A

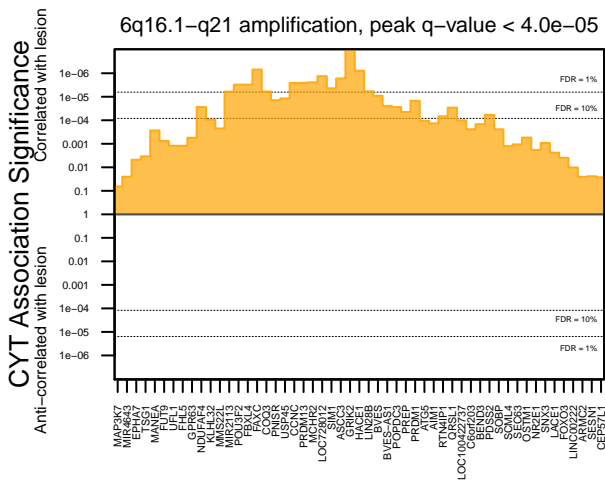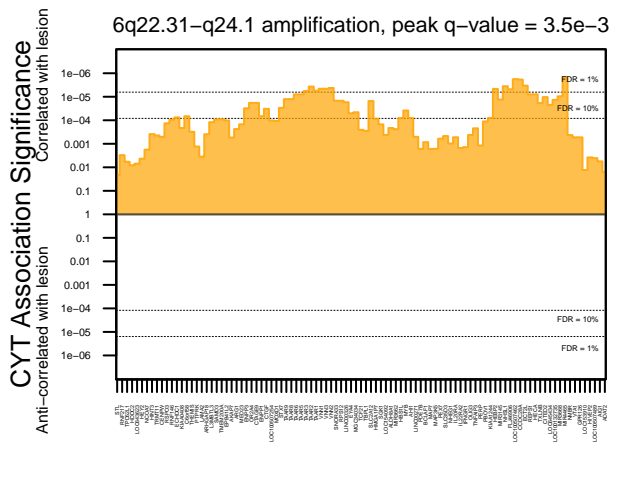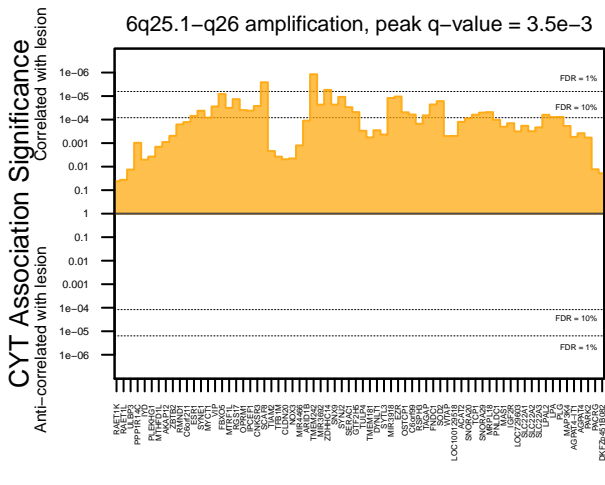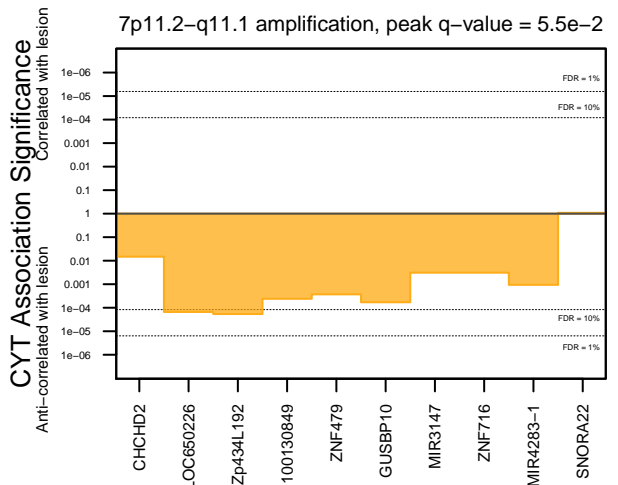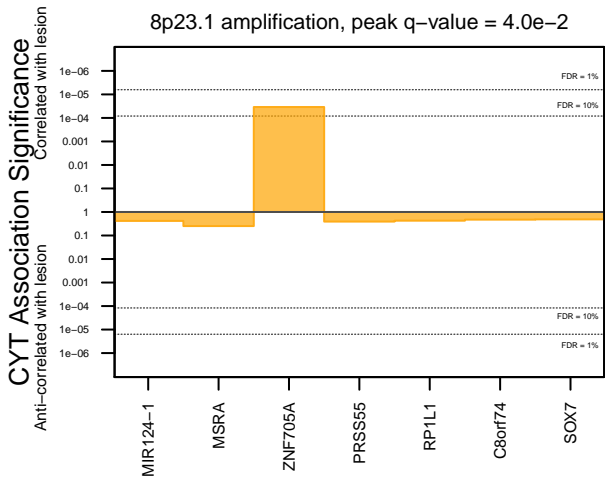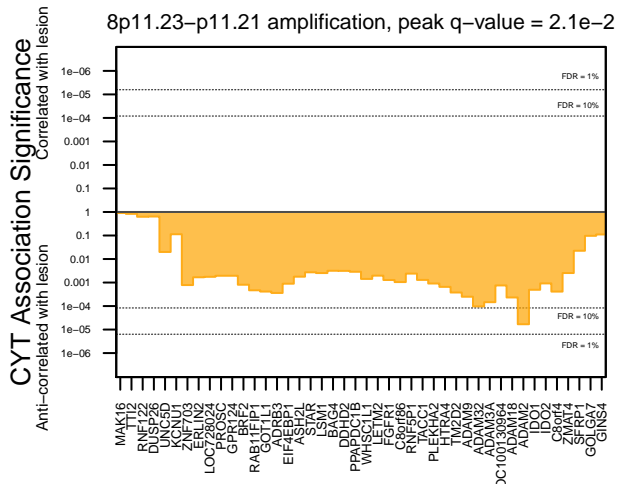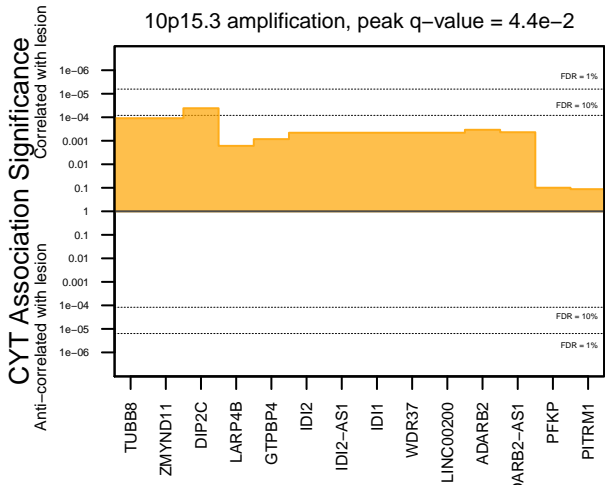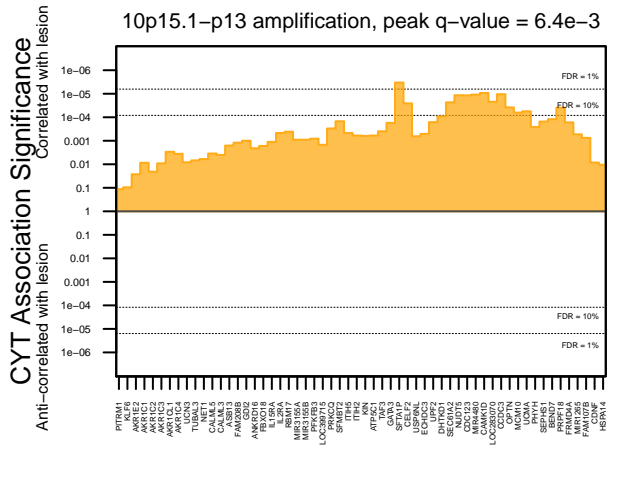

# Data S6A, cont...

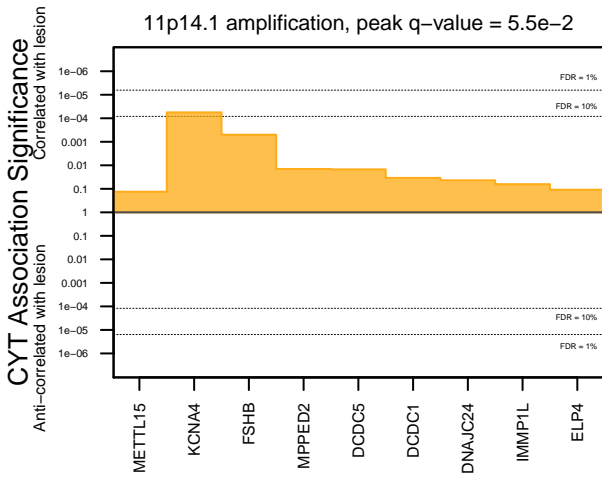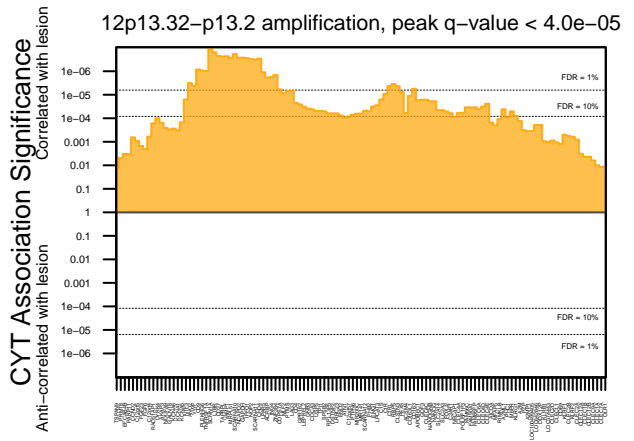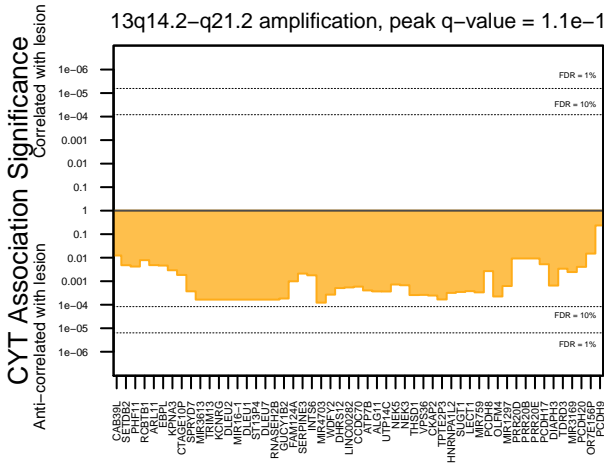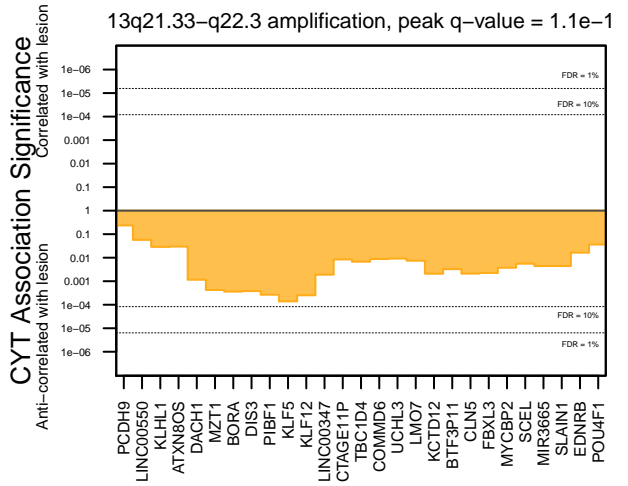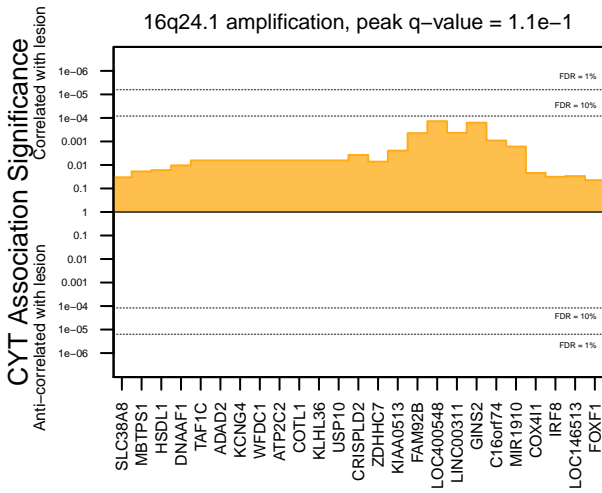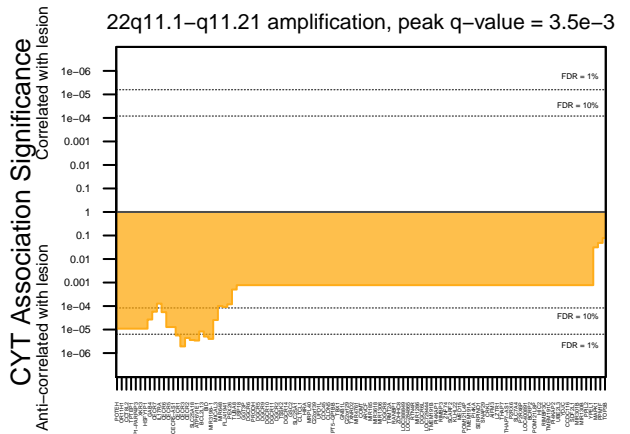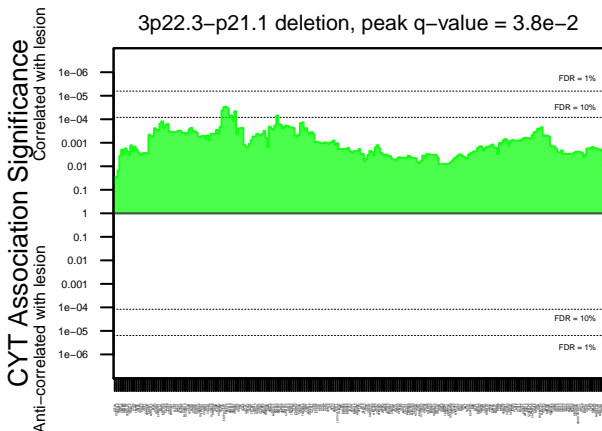

Supplement: NIHMS717941-supplement-DataS6.pdf [file NIHMS717941-supplement-DataS6.pdf]

# Data S7

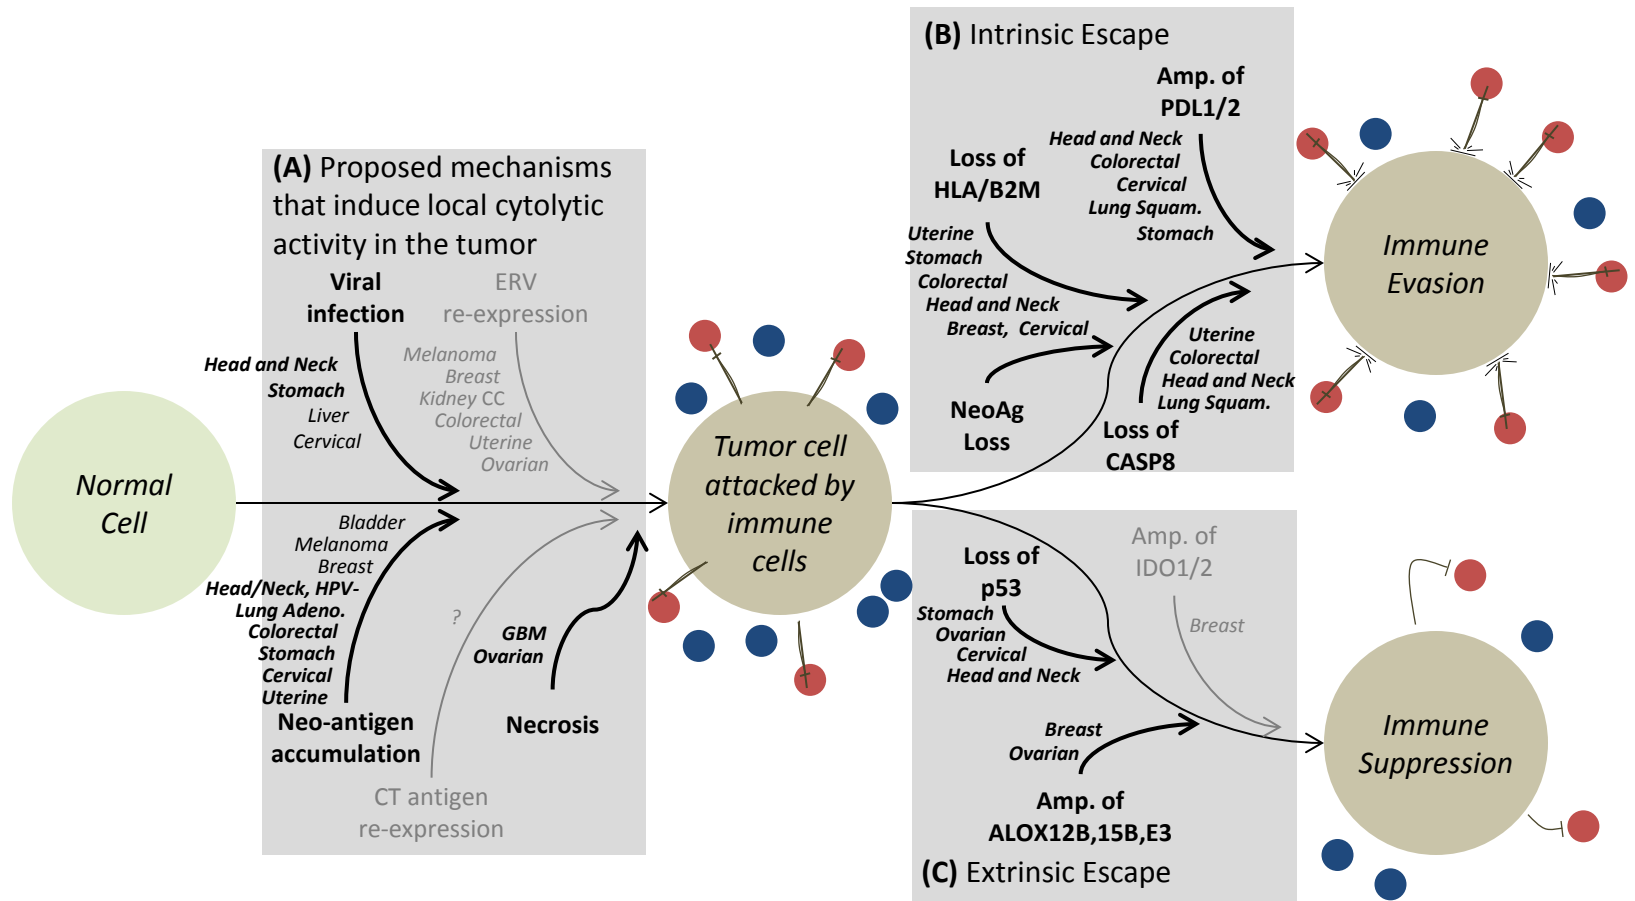

Supplement: NIHMS717941-supplement-DataS7.pdf [file NIHMS717941-supplement-DataS7.pdf]
